# Supplementary material for: Associations of mid-pregnancy HbA1c with gestational diabetes and risk of adverse pregnancy outcomes in high-risk Taiwanese women
Source: PLoS One. 2017 May 15;12(5):e0177563. doi: 10.1371/journal.pone.0177563 (PMC5432166; doi:10.1371/journal.pone.0177563)
Supplement: S1 File — (XLS) [file pone.0177563.s002.xls]

## Sheet: data
HbA1c category	HbA1c category as a continuous scale	Caesarean section	Caesarean section by idication	Prolonged labor	Shoulder dystocia	Preterm delivery (<37 weeks)	Third- or fourth-degree perineal laceration	Postpartum hemorrhage	Gestational hypertension or preeclampsia	Apgar score <7 at 1 minute	Apgar score <7 at 5 minute	Low birth weight (<2,500 g)	Macrosomia (>4,000 g)	Intrauterine fetal death	Admission to the NICU	Maternal age	BMI at delivery	Nulliparous status	delivery year
5.0-5.4	3	1	0	0	0	0	0	0	0	>=7	>=7	0	0	0	0	35.9	25.8054	0	2011
5.5-5.9	4	1	0	0	0	0	0	0	0	>=7	>=7	0	0	0	0	29.8	24.9324	1	2012
5.0-5.4	3	0	0	0	0	0	0	0	0	>=7	>=7	0	0	0	0	36.7	29.0114	0	2013
5.5-5.9	4	0	0	0	0	0	0	0	0	>=7	>=7	0	0	0	0	28.5	38.856	0	2013
4.5-4.9	2	0	0	0	0	0	0	0	0	>=7	>=7	0	0	0	0	26.7	25.6369	1	2011
5.0-5.4	3	1	0	0	0	0	0	0	0	>=7	>=7	0	0	0	0	31	26.0051	1	2012
4.5-4.9	2	0	0	0	0	0	0	0	0	>=7	>=7	0	0	0	1	20.5	23.7253	1	2007
5.5-5.9	4	1	0	0	0	0	0	0	0	>=7	>=7	0	0	0	0	34.1	27.3399	0	2006
4.5-4.9	2	0	0	0	0	0	0	0	0	>=7	>=7	0	0	0	0	33.5	28.3678	1	2013
5.0-5.4	3	0	0	0	0	0	0	0	0	>=7	>=7	0	0	0	0	33.2	19.563	0	2010
5.5-5.9	4	1	0	0	0	0	0	0	0	>=7	>=7	0	0	0	0	25.1	34.1406	1	2013
5.5-5.9	4	0	0	0	0	0	0	0	0	>=7	>=7	0	0	0	0	30.9	25.9472	1	2011
5.0-5.4	3	0	0	1	0	0	0	0	0	>=7	>=7	0	0	0	0	32	24.5747	0	2012
5.0-5.4	3	1	1	1	0	0	0	0	0	>=7	>=7	0	0	0	0	24.3	34.709	1	2013
5.0-5.4	3	0	0	0	0	0	0	0	0	>=7	>=7	0	0	0	0	30.5	25.6745	0	2007
5.0-5.4	3	0	0	0	0	0	0	0	0	>=7	>=7	0	0	0	0	28.5	36.391	1	2011
5.0-5.4	3	0	0	0	0	0	0	0	0	>=7	>=7	1	0	0	0	24.8	25.4777	1	2013
5.0-5.4	3	0	0	1	0	0	0	0	0	>=7	>=7	0	0	0	0	22.3	21.4536	0	2011
4.5-4.9	2	1	0	0	0	0	0	0	0	>=7	>=7	0	0	0	0	22.8	28.1969	1	2012
5.5-5.9	4	1	0	0	0	0	0	0	0	>=7	>=7	0	0	0	0	36.9	28.4352	0	2006
5.5-5.9	4	0	0	0	0	0	0	0	0	>=7	>=7	0	0	0	0	31.5	32.0073	1	2011
5.0-5.4	3	0	0	1	0	0	0	0	0	>=7	>=7	0	0	0	1	35	28.125	0	2010
5.0-5.4	3	1	1	1	0	0	0	0	0	>=7	>=7	0	0	0	0	29.3	27.2222	1	2010
5.5-5.9	4	0	0	1	0	0	0	0	0	>=7	>=7	1	0	0	0	22.4	20.3894	1	2009
5.0-5.4	3	0	0	0	0	0	0	0	0	>=7	>=7	0	0	0	0	30.5	25.124	0	2009
5.0-5.4	3	0	0	0	0	0	0	0	0	>=7	>=7	0	0	0	0	29.1	25.0781	1	2013
5.5-5.9	4	0	0	0	0	0	0	0	0	>=7	>=7	0	0	0	0	19.9	23.0469	0	2008
5.0-5.4	3	0	0	1	0	0	0	0	0	>=7	>=7	0	0	0	0	21.6	22.2656	0	2010
6.0-6.4	5	1	0	0	0	0	0	0	0	>=7	>=7	0	0	0	0	18.7	31.7969	0	2008
5.5-5.9	4	1	0	0	0	0	0	0	0	>=7	>=7	0	0	0	0	22.6	29.7339	0	2012
5.5-5.9	4	1	0	0	0	0	0	0	0	>=7	>=7	0	0	0	0	41.7	30.4076	0	2006
5.5-5.9	4	1	0	0	0	0	0	0	1	>=7	>=7	1	0	0	0	39.6		0	2009
5.0-5.4	3	1	1	1	0	0	0	0	0	>=7	>=7	0	0	0	0	34.6	26.3465	1	2011
5.0-5.4	3	0	0	1	0	0	0	0	0	>=7	>=7	0	0	0	0	35.3	31.4062	0	2007
5.5-5.9	4	0	0	0	0	0	0	0	0	>=7	>=7	1	0	0	1	32.7	24.4473	1	2013
5.5-5.9	4	0	0	0	0	0	0	0	0	>=7	>=7	0	0	0	1	31.6	29.9631	0	2009
5.5-5.9	4	1	0	0	0	1	0	0	0	>=7	>=7	1	0	0	0	34.3	22.5827	1	2012
5.0-5.4	3	0	0	0	0	0	0	0	0	>=7	>=7	0	0	0	0	35	20.5499	1	2010
5.0-5.4	3	0	0	0	0	0	0	0	0	>=7	>=7	0	0	0	0	39.8	22.0604	0	2008
5.5-5.9	4	0	0	0	0	0	0	0	0	>=7	>=7	0	0	0	0	30.2	23.6244	0	2009
5.0-5.4	3	1	0	0	0	0	0	0	0	>=7	>=7	0	0	0	0	34.9	29.5684	0	2007
5.5-5.9	4	1	0	0	0	1	0	0	0	>=7	>=7	0	0	0	1	35.2	27.0312	1	2007
5.5-5.9	4	1	0	0	0	0	0	0	0	>=7	>=7	0	0	0	0	39.4	27.4066	0	2011
5.5-5.9	4	1	0	0	0	0	0	0	0	>=7	>=7	0	0	0	1	36.9	25.58	1	2007
6.0-6.4	5	1	1	1	0	0	0	0	0	>=7	>=7	0	0	0	0	36	26.9788	1	2010
6.0-6.4	5	0	0	0	0	0	0	0	0	>=7	>=7	0	0	0	0	38.9	35.4564	0	2010
5.0-5.4	3	0	0	1	0	1	0	0	0	>=7	>=7	0	0	0	1	20.8	25.5391	1	2013
5.5-5.9	4	0	0	0	0	0	0	0	0	>=7	>=7	0	0	0	0	28.7	30.5469	0	2012
5.5-5.9	4	0	0	0	0	0	0	0	0	>=7	>=7	0	0	0	0	35.2	28.6501	1	2008
5.0-5.4	3	0	0	0	0	0	0	0	0	>=7	>=7	0	0	0	0	34.9	30.672	0	2007
4.5-4.9	2	1	1	1	0	0	0	0	0	>=7	>=7	0	0	0	0	39.4	25.5568	1	2010
5.5-5.9	4	1	0	0	0	0	0	0	0	>=7	>=7	0	0	0	0	37.1	27.852	0	2010
5.5-5.9	4	0	0	0	0	0	0	0	0	>=7	>=7	0	0	0	0	36.1	40.0467	0	2012
5.5-5.9	4	0	0	0	0	0	0	0	1	>=7	>=7	0	0	0	1	20.5	32.764	1	2013
5.5-5.9	4	1	0	0	0	1	0	0	0	>=7	>=7	0	0	0	1	38.6	27.1816	1	2010
5.5-5.9	4	1	0	0	0	0	0	0	0	>=7	>=7	0	0	0	0	38.3	27.0312	0	2011
5.0-5.4	3	1	0	0	0	0	0	0	0	>=7	>=7	0	0	0	0	37.8	25.6821	1	2012
6.0-6.4	5	0	0	0	0	0	0	0	0	>=7	>=7	0	0	0	0	35.8	29.0667	0	2010
1.<4.5	1	0	0	0	0	0	0	0	0	>=7	>=7	0	0	0	0	32.3	25.5111	0	2008
6.0-6.4	5	1	0	0	0	1	0	0	0	<7	<7	0	0	0	1	35.3	30.1562	1	2009
5.0-5.4	3	1	0	0	0	0	0	0	0	>=7	>=7	0	0	0	0	27.8		0	2006
4.5-4.9	2	0	0	0	0	0	0	0	0	>=7	>=7	0	0	0	0	29.6	26.3463	1	2007
4.5-4.9	2	1	0	0	0	0	0	0	0	>=7	>=7	0	0	0	0	27	27.7671	1	2008
5.0-5.4	3	1	0	0	0	0	0	0	0	>=7	>=7	0	0	0	0	35.1	29.8029	0	2007
5.5-5.9	4	1	0	0	0	0	0	0	0	>=7	>=7	0	0	0	0	41	25	1	2008
5.5-5.9	4	1	1	1	0	0	0	1	0	>=7	>=7	0	0	0	0	39.3	25	0	2011
6.0-6.4	5	0	0	0	0	0	0	0	0	>=7	>=7	0	0	0	0	34	34.049	0	2009
5.5-5.9	4	0	0	0	0	0	0	0	0	>=7	>=7	0	0	0	0	38.4	25.3906	1	2010
5.0-5.4	3	1	0	0	0	0	0	0	0	>=7	>=7	0	0	0	0	30.5	27.5901	1	2010
5.0-5.4	3	1	0	0	0	0	0	0	0	>=7	>=7	0	0	0	0	33.1	25.5811	0	2013
5.0-5.4	3	1	0	0	0	0	0	0	0	>=7	>=7	0	0	0	0	32.6	25.5363	1	2011
6.0-6.4	5	1	0	0	0	0	0	0	0	>=7	>=7	0	0	0	0	39.7	30.8185	0	2013
5.0-5.4	3	1	0	0	0	0	0	0	0	>=7	>=7	0	0	0	0	27.4	27.9421	1	2011
5.0-5.4	3	1	0	0	0	0	0	0	0	>=7	>=7	0	0	0	0	41.1	29.668	0	2012
5.0-5.4	3	1	0	0	0	0	0	0	0	>=7	>=7	0	0	0	0	39.4	33.0679	0	2008
4.5-4.9	2	1	0	0	0	0	0	0	0	>=7	>=7	0	0	0	0	33.2	25.6373	0	2012
5.5-5.9	4	1	0	0	0	0	0	0	0	>=7	>=7	0	0	0	0	37.1	24.0385	0	2006
5.5-5.9	4	0	0	0	0	0	0	0	0	>=7	>=7	0	0	0	0	29.5	36.2109	0	2009
5.5-5.9	4	0	0	0	0	0	0	0	0	>=7	>=7	0	0	0	0	34	21.0962	0	2007
5.5-5.9	4	0	0	0	0	0	0	0	0	>=7	>=7	0	0	0	0	31.3	28.7614	1	2010
5.0-5.4	3	1	1	1	0	0	0	0	0	>=7	>=7	0	0	0	0	27.8	25.6312	1	2007
5.0-5.4	3	0	0	0	0	0	0	0	0	>=7	>=7	0	0	0	0	33.4	27.5087	0	2011
5.5-5.9	4	1	0	0	0	0	0	0	0	>=7	>=7	0	0	0	0	35.1	37.1135	0	2007
5.0-5.4	3	1	0	0	0	0	0	0	0	>=7	>=7	0	0	0	0	31.8	21.5645	1	2010
4.5-4.9	2	1	0	0	0	0	0	0	0	>=7	>=7	0	0	0	0	34	24.841	0	2012
5.0-5.4	3	0	0	0	0	0	0	0	0	>=7	>=7	0	0	0	0	25	29.2421	1	2007
5.5-5.9	4	0	0	0	0	0	0	0	0	>=7	>=7	0	0	0	0	35.2	24	0	2008
5.5-5.9	4	0	0	0	0	0	0	0	0	>=7	>=7	1	0	0	0	32.2	28.8338	1	2012
4.5-4.9	2	0	0	0	0	0	0	0	0	>=7	>=7	0	0	0	0	25.2	28.99	1	2012
5.5-5.9	4	0	0	0	0	0	0	0	1	>=7	>=7	0	0	0	0	18.7	23.0593	1	2011
4.5-4.9	2	0	0	0	0	0	0	0	0	>=7	>=7	0	0	0	0	33.2	29.1363	1	2006
5.0-5.4	3	0	0	1	0	0	0	0	0	>=7	>=7	0	0	0	0	23.7	24.1948	0	2013
5.0-5.4	3	1	1	1	0	0	0	0	0	>=7	>=7	0	0	0	0	30.2	30.2436	1	2008
4.5-4.9	2	0	0	0	0	0	0	0	0	>=7	>=7	0	0	0	0	35.6	24.0129	1	2011
5.5-5.9	4	0	0	0	0	1	0	0	0	>=7	>=7	0	0	0	0	33.2	32.7449	0	2009
5.5-5.9	4	1	0	0	0	1	0	0	0	>=7	>=7	0	0	0	0	33.9	28.3168	1	2010
5.5-5.9	4	1	0	0	0	0	0	0	0	>=7	>=7	0	0	0	0	34.9	26.5966	0	2013
5.0-5.4	3	1	1	1	0	0	0	0	0	>=7	>=7	0	0	0	0	34	22.5827	1	2011
5.5-5.9	4	0	0	0	0	0	0	1	0	>=7	>=7	0	0	0	0	35.7	27.5781	1	2011
6.0-6.4	5	1	0	0	0	1	0	0	1	>=7	>=7	0	0	0	0	29.9	54.9128	1	2012
5.5-5.9	4	1	0	0	0	0	0	0	0	>=7	>=7	0	0	0	0	41.2	38.9928	0	2008
5.0-5.4	3	0	0	1	0	0	0	0	0	>=7	>=7	0	0	0	0	34.2	35.9245	0	2013
5.5-5.9	4	0	0	0	0	0	0	0	0	>=7	>=7	0	0	0	0	34.7	27.852	0	2008
5.0-5.4	3	0	0	0	0	0	0	0	0	>=7	>=7	0	0	0	0	27.3	27.5482	0	2007
5.5-5.9	4	0	0	0	0	0	0	0	1	>=7	>=7	1	0	0	0	37.3	28.6328	0	2008
5.5-5.9	4	1	0	0	0	0	0	0	0	>=7	>=7	0	0	0	0	38.9	25.1486	0	2011
5.0-5.4	3	0	0	0	0	0	0	0	0	>=7	>=7	0	0	0	0	35.6	27.8159	1	2011
5.0-5.4	3	1	1	1	0	0	0	0	0	>=7	>=7	0	0	0	0	41.4	25.7117	1	2006
5.0-5.4	3	1	0	0	0	0	0	0	0	>=7	>=7	1	0	0	0	34	25.5588	0	2008
4.5-4.9	2	0	0	1	0	0	0	0	0	>=7	>=7	1	0	0	0	31.6	27.0135	0	2012
5.0-5.4	3	0	0	1	0	1	0	0	0	>=7	>=7	0	0	0	0	28.6	24.1635	1	2008
4.5-4.9	2	1	1	1	0	0	0	0	0	>=7	>=7	0	0	0	0	36.3	25.307	1	2013
5.5-5.9	4	0	0	0	0	0	0	0	0	>=7	>=7	0	0	0	0	25.4	24.6953	0	2010
5.5-5.9	4	1	1	1	0	0	0	0	0	>=7	>=7	0	0	0	0	33	29.1363	1	2009
5.5-5.9	4	0	0	0	0	0	0	0	0	>=7	>=7	0	1	0	0	28.5	27.5873	1	2011
4.5-4.9	2	0	0	0	0	0	0	0	0	>=7	>=7	0	0	0	0	33.8	25.7901	0	2012
5.5-5.9	4	0	0	0	0	0	0	0	0	>=7	>=7	0	0	0	0	35.7	32.8	0	2011
5.0-5.4	3	0	0	1	0	0	0	0	0	>=7	>=7	1	0	0	0	31.7	25.6889	1	2012
5.0-5.4	3	0	0	0	0	0	0	0	0	>=7	>=7	0	0	0	0	36.2	36.8783	1	2013
5.5-5.9	4	1	0	0	0	0	0	0	0	>=7	>=7	0	0	0	0	29.9	26.6347	0	2009
5.0-5.4	3	0	0	0	0	0	0	0	0	>=7	>=7	0	0	0	0	39.3	33.9646	0	2013
6.0-6.4	5	1	0	0	0	0	0	0	1	>=7	>=7	0	0	0	0	34.3	32.3884	0	2013
5.0-5.4	3	1	0	0	0	0	0	0	0	>=7	>=7	0	0	0	0	41.6	26.0375	1	2012
5.0-5.4	3	1	0	0	0	0	0	0	0	>=7	>=7	0	0	0	0	31.6	28.4711	0	2008
6.0-6.4	5	1	0	0	0	0	0	0	1	>=7	>=7	0	0	0	0	25.9	32.9708	0	2008
5.5-5.9	4	1	0	0	0	0	0	0	1	>=7	>=7	0	0	0	0	28.6	32.6659	0	2011
5.0-5.4	3	0	0	0	0	0	0	0	0	>=7	>=7	0	0	0	0	35.9	26.1749	0	2009
5.0-5.4	3	1	0	0	0	0	0	0	0	>=7	>=7	0	0	0	0	36	24.5319	1	2007
5.5-5.9	4	0	0	0	0	0	0	0	0	>=7	>=7	0	0	0	0	36.1	33.7925	0	2009
5.5-5.9	4	1	0	0	0	0	0	0	0	>=7	>=7	0	0	0	0	33.1	26.0776	0	2008
4.5-4.9	2	0	0	0	0	0	0	0	0	>=7	>=7	0	0	0	0	37	22.3133	1	2012
6.0-6.4	5	1	1	1	0	0	0	0	1	>=7	>=7	0	0	0	0	28	37.9539	1	2007
5.5-5.9	4	1	0	0	0	0	0	0	0	>=7	>=7	0	0	0	0	32.5	34.2222	0	2007
5.5-5.9	4	1	0	0	0	0	0	0	0	>=7	>=7	0	0	0	0	39.3	28.8754	1	2012
5.0-5.4	3	0	0	0	0	1	0	0	0	>=7	>=7	0	0	0	0	31.9	33.7149	1	2007
4.5-4.9	2	0	0	0	0	0	0	0	0	>=7	>=7	0	0	0	0	33.9	23.5613	0	2009
5.0-5.4	3	0	0	0	0	0	0	0	0	>=7	>=7	0	0	0	0	35.4	28.8581	1	2011
6.5-6.9	6	1	0	0	0	0	0	0	0	>=7	>=7	0	0	0	0	31.3	35.3386	1	2012
6.0-6.4	5	1	0	0	0	0	0	0	0	>=7	>=7	0	0	0	0	36.9	25.8773	1	2012
5.5-5.9	4	1	0	0	0	0	0	0	0	>=7	>=7	0	0	0	0	32.8	29.3333	1	2010
5.5-5.9	4	0	0	0	0	0	0	0	0	>=7	>=7	0	0	0	0	36.8	35.9375	0	2008
5.5-5.9	4	0	0	0	0	0	0	0	0	>=7	>=7	0	0	0	0	35.1	25.64	0	2011
5.5-5.9	4	0	0	0	0	0	0	0	0	>=7	>=7	0	0	0	0	34.9	24.974	1	2010
5.0-5.4	3	0	0	0	0	0	0	0	0	>=7	>=7	0	0	0	0	24.5	28.0082	1	2009
5.5-5.9	4	0	0	0	0	0	0	0	0	>=7	>=7	0	0	0	0	31.4	22.0158	0	2008
5.0-5.4	3	0	0	0	0	0	0	0	0	>=7	>=7	0	0	0	0	35.5	30.2545	1	2013
5.5-5.9	4	1	0	0	0	0	0	0	0	>=7	>=7	0	0	0	0	34.1	27.1816	0	2007
5.0-5.4	3	0	0	0	0	0	0	0	0	>=7	>=7	0	0	0	0	34.5	29.2446	1	2010
5.5-5.9	4	0	0	0	0	0	0	0	0	>=7	>=7	0	0	0	0	38	23.1834	0	2011
5.0-5.4	3	1	0	0	0	0	0	0	0	>=7	>=7	0	0	0	0	28.7	26.545	0	2006
5.0-5.4	3	1	1	1	0	0	0	0	0	>=7	>=7	0	0	0	0	25	25.7964	1	2012
5.0-5.4	3	1	0	0	0	0	0	0	0	>=7	>=7	0	0	0	0	31.6	24.7768	0	2009
5.0-5.4	3	0	0	0	0	0	0	0	0	>=7	>=7	0	0	0	0	31	27.2633	0	2007
5.0-5.4	3	0	0	0	0	0	0	0	0	>=7	>=7	0	0	0	0	35.4	30.9275	0	2012
5.5-5.9	4	0	0	0	0	0	0	0	1	>=7	>=7	0	0	0	0	41.3	28.0026	0	2011
5.0-5.4	3	1	1	1	0	0	0	0	0	>=7	>=7	0	0	0	0	20.9	32.0499	1	2011
5.0-5.4	3	1	0	0	0	0	0	0	0	>=7	>=7	0	1	0	0	24	33.2935	1	2007
5.0-5.4	3	1	0	0	0	0	0	0	0	>=7	>=7	0	0	0	0	29.8	25.1851	0	2010
5.0-5.4	3	1	0	0	0	0	0	0	0	>=7	>=7	0	0	0	0	32.9	24.423	0	2013
5.0-5.4	3	0	0	0	0	0	0	0	0	>=7	>=7	0	0	0	0	28.5	31.6856	0	2011
5.0-5.4	3	0	0	0	0	0	0	0	0	>=7	>=7	0	0	0	0	31.5	28.6215	0	2011
5.0-5.4	3	0	0	0	0	0	0	0	0	>=7	>=7	0	0	0	0	34.5	25.8372	0	2011
5.0-5.4	3	0	0	0	0	0	0	0	0	>=7	>=7	0	0	0	0	21.7	24.2424	0	2010
4.5-4.9	2	0	0	0	0	0	0	0	0	>=7	>=7	0	0	0	0	24.4	24.6875	0	2012
5.5-5.9	4	0	0	0	0	0	0	0	0	>=7	>=7	0	0	0	0	40.5	24.8235	0	2013
5.5-5.9	4	0	0	0	0	0	0	0	0	>=7	>=7	0	0	0	0	28.1	28.441	0	2007
4.5-4.9	2	0	0	0	0	0	0	0	0	>=7	>=7	0	0	0	0	25.8	25.6369	1	2007
5.5-5.9	4	0	0	0	0	0	0	0	0	>=7	>=7	0	0	0	0	36.2	25.8478	0	2012
5.0-5.4	3	0	0	0	0	0	0	0	0	>=7	>=7	1	0	0	1	35.6	24.0796	1	2012
5.5-5.9	4	0	0	1	0	0	0	0	0	>=7	>=7	0	0	0	0	38.1	26.4889	0	2012
5.5-5.9	4	0	0	0	0	0	0	0	0	>=7	>=7	0	0	0	0	39.8	31.7226	0	2013
5.5-5.9	4	0	0	0	1	0	1	0	0	>=7	>=7	0	0	0	0	40.3	27.5306	0	2012
5.0-5.4	3	1	1	0	0	0	0	0	0	>=7	>=7	0	0	0	0	35.3	26.2626	0	2012
4.5-4.9	2	0	0	0	0	0	0	0	0	>=7	>=7	0	0	0	0	32.5	24.8437	0	2008
1.<4.5	1	0	0	0	0	0	1	0	0	>=7	>=7	0	0	0	0	35.5	22.4082	1	2010
5.5-5.9	4	1	0	0	0	0	0	0	0	>=7	>=7	0	0	0	0	36.4	23.634	0	2010
4.5-4.9	2	1	0	0	0	0	0	0	0	>=7	>=7	0	0	0	0	33.4	26.3702	1	2007
5.0-5.4	3	0	0	0	0	0	0	0	0	>=7	>=7	0	0	0	0	35.3	25.7964	0	2010
5.0-5.4	3	0	0	0	0	0	0	0	0	>=7	>=7	0	0	0	0	28.8	29.4531	1	2008
6.0-6.4	5	0	0	0	0	0	0	0	0	>=7	>=7	0	0	0	0	30.7	28.6501	0	2008
5.0-5.4	3	0	0	0	0	1	0	0	0	>=7	>=7	1	0	0	0	33	26.358	0	2007
5.0-5.4	3	1	0	0	0	0	0	0	0	>=7	>=7	0	0	0	0	32.4	33.2752	0	2013
5.5-5.9	4	1	0	0	0	0	0	0	0	>=7	>=7	0	0	0	0	42.3	28.8415	0	2011
5.5-5.9	4	1	0	0	0	0	0	0	0	>=7	>=7	0	0	0	0	27.4	22.6562	0	2006
6.0-6.4	5	0	0	0	0	1	0	0	0	>=7	>=7	1	0	0	1	30.2	29.9556	0	2011
5.0-5.4	3	0	0	0	0	0	0	0	0	>=7	>=7	0	0	0	0	30.2	25.6382	0	2008
5.5-5.9	4	0	0	1	0	0	0	0	0	>=7	>=7	0	0	0	0	33.3	31.8025	0	2007
5.0-5.4	3	0	0	0	0	0	0	0	0	>=7	>=7	0	0	0	0	29	38.494	0	2007
5.0-5.4	3	0	0	0	0	0	0	0	0	>=7	>=7	0	0	0	0	31.1	23.564	0	2009
5.0-5.4	3	1	0	0	0	0	0	0	0	>=7	>=7	0	0	0	0	38.3	29.2421	0	2006
5.0-5.4	3	0	0	0	0	0	0	0	0	>=7	>=7	0	0	0	0	31.7	24.9135	0	2010
5.0-5.4	3	1	0	0	0	1	0	0	0	>=7	>=7	1	0	0	1	22.5	21.3586	0	2008
5.0-5.4	3	0	0	0	0	1	0	0	0	>=7	>=7	0	0	0	0	35.8	27.1203	0	2011
4.5-4.9	2	0	0	0	0	0	0	0	0	>=7	>=7	0	0	0	0	28.2	28.2622	1	2012
4.5-4.9	2	0	0	0	0	0	0	0	0	>=7	>=7	0	0	0	0	25	21.1446	1	2007
4.5-4.9	2	0	0	0	0	0	0	0	0	>=7	>=7	0	0	0	0	33.8	24.7409	0	2013
5.5-5.9	4	1	0	0	0	0	0	0	0	>=7	>=7	0	0	0	0	34.1	31.0154	0	2009
5.0-5.4	3	1	0	0	0	1	0	0	0	>=7	>=7	0	0	0	0	39.1	26.6582	0	2009
5.0-5.4	3	0	0	0	0	0	0	0	0	>=7	>=7	0	0	0	1	33.2	24.996	0	2007
5.0-5.4	3	0	0	0	0	0	0	0	0	>=7	>=7	0	0	0	0	33.5	24.539	0	2006
5.5-5.9	4	1	1	0	0	0	0	0	0	>=7	>=7	0	1	0	0	30.6	29.5109	1	2009
5.0-5.4	3	1	0	0	0	0	0	0	0	>=7	>=7	0	0	0	0	29.1	30.1838	1	2012
5.0-5.4	3	1	0	0	0	0	0	0	0	>=7	>=7	0	0	0	0	33.2	30.5309	0	2009
5.5-5.9	4	1	0	0	0	0	0	0	0	>=7	>=7	0	0	0	0	30.7	32.0513	1	2012
5.0-5.4	3	1	1	1	0	0	0	0	0	>=7	>=7	0	0	0	0	32.5	28.6667	1	2011
5.5-5.9	4	1	0	0	0	0	0	0	0	>=7	>=7	0	0	0	0	33	30.0433	0	2012
5.0-5.4	3	1	0	0	0	0	0	0	0	>=7	>=7	0	0	0	0	24	32.764	1	2013
5.0-5.4	3	0	0	0	0	0	0	0	0	>=7	>=7	0	0	0	0	29.5	22.3437	1	2008
5.5-5.9	4	1	0	0	0	0	0	0	0	>=7	>=7	0	0	0	0	33.2	24.7475	0	2008
5.5-5.9	4	1	0	0	0	1	0	0	0	<7	>=7	1	0	0	1	36	29.2257	0	2012
5.5-5.9	4	0	0	1	0	0	0	0	0	>=7	>=7	0	0	0	0	25.1	24.1415	1	2009
5.0-5.4	3	0	0	0	0	0	0	0	0	>=7	>=7	0	0	0	0	35.7	27.1046	0	2010
4.5-4.9	2	0	0	0	0	0	0	0	0	>=7	>=7	0	0	0	0	39.3	21.3111	0	2013
6.0-6.4	5	0	0	0	0	0	0	0	0	>=7	>=7	0	0	0	0	26.9	28.8889	0	2007
5.0-5.4	3	1	0	0	0	0	0	0	0	>=7	>=7	0	0	0	0	31.2	28.5032	1	2010
5.5-5.9	4	0	0	0	0	0	0	0	0	>=7	>=7	0	0	0	0	21.2	24.0346	1	2010
5.0-5.4	3	0	0	0	0	0	0	0	0	>=7	>=7	0	0	0	0	35.3	27.76	0	2010
5.0-5.4	3	0	0	0	0	0	0	0	0	>=7	>=7	0	0	0	0	23.5	28.3594	0	2009
5.0-5.4	3	0	0	0	0	0	0	0	0	>=7	>=7	0	0	0	0	38.4	31.4102	0	2008
5.0-5.4	3	0	0	0	0	0	0	0	0	>=7	>=7	0	0	0	0	31.6	26.8441	0	2013
5.0-5.4	3	0	0	0	0	0	0	0	0	>=7	>=7	0	0	0	0	25.4	29.4107	0	2011
5.0-5.4	3	0	0	0	0	0	0	0	0	>=7	>=7	0	0	0	0	34.5	24.2079	0	2013
4.5-4.9	2	1	0	0	0	0	0	0	0	>=7	>=7	0	0	0	0	32.5	23.4591	0	2013
5.5-5.9	4	1	0	0	0	0	0	0	0	<7	>=7	0	0	0	1	36	35.1742	0	2012
5.5-5.9	4	0	0	0	0	0	0	0	0	>=7	>=7	0	0	0	0	27.7	32.8906	0	2007
5.0-5.4	3	1	1	1	0	0	0	0	0	>=7	>=7	0	0	0	0	28.1	25.8773	1	2008
5.5-5.9	4	0	0	0	0	0	0	0	0	>=7	>=7	0	0	0	0	27.6	36.1988	1	2009
5.5-5.9	4	1	1	1	0	0	0	0	0	>=7	>=7	0	0	0	0	36	28.0823	1	2010
5.5-5.9	4	0	0	0	0	0	0	0	0	>=7	>=7	0	0	0	0	23.5	26.0375	1	2010
5.5-5.9	4	0	0	0	0	0	0	0	0	>=7	>=7	0	0	0	0	37	27.2392	0	2010
5.0-5.4	3	0	0	0	0	0	0	0	0	>=7	>=7	0	0	0	0	36.2	24.8075	1	2011
5.0-5.4	3	0	0	0	0	0	0	0	0	>=7	>=7	0	0	0	0	35.2	25.0519	1	2009
5.0-5.4	3	0	0	1	0	0	0	0	0	>=7	>=7	0	0	0	0	35.3	25.4687	0	2011
5.5-5.9	4	0	0	0	0	0	0	0	0	>=7	>=7	0	0	0	0	34.2	28.3594	1	2009
5.5-5.9	4	0	0	0	0	0	0	0	0	>=7	>=7	0	0	0	0	35.9	27.5781	0	2011
6.0-6.4	5	1	1	1	0	0	0	0	0	>=7	>=7	0	0	0	0	29.6	29.2969	1	2011
5.0-5.4	3	1	1	1	0	0	0	0	1	>=7	>=7	0	0	0	0	29.9	25.2363	1	2006
5.0-5.4	3	1	0	0	0	1	0	0	0	>=7	>=7	1	0	0	1	36.7	21.0937	1	2013
5.0-5.4	3	0	0	0	0	0	0	0	1	>=7	>=7	1	0	0	0	30	26.5347	0	2012
6.0-6.4	5	1	0	0	0	1	0	0	0	>=7	>=7	0	0	0	1	35.1	32.1484	0	2007
5.5-5.9	4	1	0	0	0	0	0	0	0	>=7	>=7	0	0	0	0	31.2	36.0519	1	2007
6.0-6.4	5	1	0	0	0	0	0	0	0	>=7	>=7	0	0	0	0	32.6	36.813	0	2009
5.0-5.4	3	1	0	0	0	0	0	0	0	>=7	>=7	0	0	0	0	27.2	29.6427	1	2011
5.0-5.4	3	0	0	0	0	0	0	0	0	>=7	>=7	0	0	0	0	28.6	22.8125	1	2007
5.5-5.9	4	1	1	0	0	0	0	0	0	>=7	>=7	0	1	0	0	37.3	26.7094	0	2009
4.5-4.9	2	1	0	0	0	0	0	0	0	>=7	>=7	0	0	0	0	26.3	26.2222	0	2011
5.0-5.4	3	0	0	0	0	0	0	0	0	>=7	>=7	0	0	0	0	37.1	31.6346	1	2006
5.0-5.4	3	0	0	1	0	0	0	0	0	>=7	>=7	0	0	0	0	38.7	32.4219	0	2008
6.0-6.4	5	1	0	0	0	0	0	0	0	>=7	>=7	0	1	0	0	37.1	27.4762	0	2013
5.0-5.4	3	0	0	0	0	0	1	0	0	>=7	>=7	0	0	0	0	29.9	22.4323	1	2008
5.5-5.9	4	1	0	0	0	0	0	0	0	>=7	>=7	0	1	0	0	29.3	29.7521	0	2007
5.0-5.4	3	0	0	0	0	0	0	0	0	>=7	>=7	0	0	0	0	27.4	25.9701	1	2007
5.0-5.4	3	0	0	0	0	0	0	0	0	>=7	>=7	0	0	0	0	29.3	25.5588	1	2009
4.5-4.9	2	0	0	0	0	0	0	0	0	>=7	>=7	0	0	0	0	31.2	22.8329	0	2011
5.5-5.9	4	0	0	0	0	0	0	0	0	>=7	>=7	0	0	0	0	34.7	23.5807	1	2009
5.0-5.4	3	0	0	0	0	0	0	0	0	>=7	>=7	1	0	0	0	33.7	28.4008	1	2009
5.0-5.4	3	0	0	0	0	0	0	0	0	>=7	>=7	0	0	0	0	26.1	26.6991	0	2007
5.0-5.4	3	0	0	0	0	0	0	0	0	>=7	>=7	0	0	0	0	30.9	26.2227	1	2012
5.5-5.9	4	1	0	0	0	0	0	0	0	>=7	>=7	0	0	0	0	35.9	24.5954	0	2012
5.0-5.4	3	0	0	0	0	0	0	0	0	>=7	>=7	0	0	0	1	29.9	31.6444	1	2009
5.5-5.9	4	0	0	0	0	0	0	0	0	>=7	>=7	0	0	0	0	35.4	27.8702	1	2007
5.0-5.4	3	0	0	0	0	0	0	0	0	>=7	>=7	0	0	0	0	38.8	23.6874	0	2013
5.0-5.4	3	0	0	0	0	0	0	0	0	>=7	>=7	0	0	0	0	28.3	24.3893	1	2009
5.5-5.9	4	1	0	0	0	0	0	0	0	>=7	>=7	0	0	0	0	36	26.3465	1	2010
6.0-6.4	5	1	0	0	0	0	0	0	0	>=7	>=7	0	0	0	0	36.5	31.245	0	2010
5.5-5.9	4	1	0	0	0	0	0	0	0	>=7	>=7	0	0	0	0	35.4	36.8481	0	2011
>=7	7	0	0	0	0	1	0	0	0	>=7	>=7	1	0	0	0	36.6	23.557	1	2013
5.5-5.9	4	1	0	0	0	0	0	0	0	>=7	>=7	0	1	0	0	38.9	35.3906	0	2011
5.5-5.9	4	1	0	0	0	1	0	0	0	<7	>=7	1	0	0	1	32.8	29.1363	0	2011
5.0-5.4	3	0	0	0	0	0	0	0	0	>=7	>=7	0	0	0	0	36.4	23.9152	0	2006
1.<4.5	1	0	0	0	0	0	0	0	0	>=7	>=7	0	0	0	0	29.1	21.0772	1	2013
5.0-5.4	3	1	1	1	0	0	0	0	0	>=7	>=7	0	0	0	0	29.1	28.6818	1	2008
6.5-6.9	6	0	0	0	0	1	0	0	1	>=7	>=7	0	0	0	1	25.3	39.0448	1	2006
5.0-5.4	3	1	1	1	0	0	0	0	1	>=7	>=7	0	0	0	0	30	27.7651	1	2007
5.0-5.4	3	0	0	0	0	0	1	0	1	>=7	>=7	1	0	0	0	31.3	23.8061	1	2011
5.5-5.9	4	0	0	1	0	0	0	0	0	>=7	>=7	0	0	0	0	34	27.5873	1	2012
5.0-5.4	3	1	0	0	0	0	0	0	0	>=7	>=7	0	0	0	0	34	28.3447	0	2010
4.5-4.9	2	0	0	0	0	0	0	0	0	>=7	>=7	0	0	0	0	25	24.9219	1	2006
5.5-5.9	4	0	0	0	0	0	0	0	1	>=7	>=7	0	1	0	0	18.9	29.6908	1	2013
5.0-5.4	3	1	0	0	0	0	0	0	0	>=7	>=7	0	0	0	0	32.7	31.3672	1	2009
6.0-6.4	5	0	0	0	0	0	0	0	0	>=7	>=7	0	0	0	0	36.8	27.3439	1	2010
5.5-5.9	4	0	0	0	0	0	0	0	0	>=7	>=7	0	0	0	0	38.2	26.2985	0	2011
5.0-5.4	3	0	0	0	0	1	1	0	0	>=7	>=7	0	0	0	0	29.4	26.6389	0	2006
5.0-5.4	3	0	0	1	0	0	0	0	0	>=7	>=7	0	0	0	0	39.6	26.5021	0	2009
4.5-4.9	2	0	0	0	0	0	0	0	0	>=7	>=7	0	0	0	0	33	21.3841	0	2013
5.0-5.4	3	1	0	0	0	0	0	0	0	>=7	>=7	0	0	0	0	31.6	33.5937	1	2010
5.5-5.9	4	0	0	0	0	0	0	0	0	>=7	>=7	0	0	0	0	40.1	28.9062	0	2010
5.0-5.4	3	1	0	0	0	0	0	0	0	>=7	>=7	0	0	0	0	36.5	21.3726	0	2013
5.0-5.4	3	0	0	0	0	0	0	0	0	>=7	>=7	0	0	0	0	33.5	22.0948	1	2012
5.5-5.9	4	0	0	0	0	0	0	0	0	>=7	>=7	0	0	0	0	34	23.3399	1	2006
5.5-5.9	4	0	0	1	0	0	0	0	0	>=7	>=7	0	0	0	0	36.3	24.2439	0	2009
5.5-5.9	4	1	0	0	0	0	0	0	0	>=7	>=7	0	0	0	1	35.5	24.5333	0	2006
5.5-5.9	4	1	0	0	0	0	0	0	0	>=7	>=7	0	0	0	0	32.4	32.93	0	2011
5.5-5.9	4	1	0	0	0	0	0	0	0	>=7	>=7	0	0	0	0	29.1	26.7759	0	2006
4.5-4.9	2	0	0	0	0	0	0	0	0	>=7	>=7	0	0	0	0	20.4	29.2101	1	2010
5.0-5.4	3	0	0	0	0	0	0	0	0	>=7	>=7	0	0	0	0	21.9	32.2464	0	2012
5.5-5.9	4	1	0	0	0	0	0	0	0	>=7	>=7	0	0	0	0	38.9	27.1816	0	2007
5.0-5.4	3	0	0	0	0	0	0	0	0	>=7	>=7	0	0	0	0	29.4	22.1003	1	2010
5.5-5.9	4	0	0	0	0	0	0	0	0	>=7	>=7	0	0	0	0	24.7	23.634	0	2011
6.5-6.9	6	1	1	0	0	0	0	0	0	>=7	>=7	0	1	0	0	25.9	28.7356	1	2009
5.0-5.4	3	0	0	0	0	0	0	0	0	>=7	>=7	0	0	0	0	29.8	29.7211	1	2012
5.0-5.4	3	0	0	0	0	0	0	0	0	>=7	>=7	0	0	0	1	28.7	28.2709	1	2012
5.5-5.9	4	0	0	0	0	1	0	0	0	>=7	>=7	1	0	0	1	34.8	26.3111	0	2008
5.0-5.4	3	0	0	1	0	0	0	0	0	>=7	>=7	0	0	0	0	33.2	25	0	2007
5.5-5.9	4	1	0	0	0	1	0	0	0	>=7	>=7	1	0	0	1	30.5	33.2671	0	2009
5.0-5.4	3	0	0	0	0	1	0	0	0	>=7	>=7	0	0	0	0	35.8	22.4197	0	2010
6.0-6.4	5	1	0	0	0	0	0	0	1	>=7	>=7	0	0	0	0	42.5	29.4758	0	2012
5.0-5.4	3	0	0	0	0	0	0	1	0	>=7	>=7	0	0	0	0	37.4	23.634	0	2009
4.5-4.9	2	1	0	0	0	0	0	0	0	>=7	>=7	0	0	0	0	35	27.0993	0	2011
5.0-5.4	3	0	0	0	0	0	0	0	0	>=7	>=7	0	0	0	0	27.7	23.5078	1	2008
5.0-5.4	3	1	0	0	0	0	0	0	0	>=7	>=7	0	0	0	0	33	31.6263	0	2008
5.0-5.4	3	1	0	0	0	0	0	0	0	>=7	>=7	0	0	0	0	32.9	30.4076	0	2011
5.0-5.4	3	0	0	0	0	0	0	0	0	>=7	>=7	0	0	0	0	33.7	28.125	0	2012
5.5-5.9	4	0	0	0	0	0	0	0	0	>=7	>=7	0	0	0	0	28.9	23.4484	1	2010
5.5-5.9	4	0	0	0	0	0	1	0	0	>=7	>=7	1	0	0	0	29.2	21.6311	1	2013
1.<4.5	1	0	0	0	0	1	0	0	0	>=7	>=7	1	0	0	1	36.7	25.5469	0	2012
5.0-5.4	3	1	0	0	0	0	0	0	0	>=7	>=7	0	0	0	0	22.7	24.1635	1	2012
5.0-5.4	3	1	0	0	0	0	0	0	0	>=7	>=7	0	0	0	0	34.5	28.0404	0	2011
5.0-5.4	3	1	0	0	0	0	0	0	0	>=7	>=7	0	0	0	0	30.9	23.9352	0	2011
5.0-5.4	3	0	0	0	0	0	0	0	1	>=7	>=7	1	0	0	1	28.7	36.8531	1	2011
5.5-5.9	4	1	0	0	0	0	0	0	0	>=7	>=7	0	0	0	0	33	26.1427	1	2009
5.5-5.9	4	1	0	0	0	0	0	0	0	>=7	>=7	0	0	0	0	34.9	27.7008	0	2010
5.5-5.9	4	1	1	1	0	0	0	0	0	>=7	>=7	0	0	0	0	30.8	28.9694	1	2013
5.5-5.9	4	0	0	0	0	1	0	0	0	>=7	>=7	1	0	0	1	32.3	25	1	2010
5.5-5.9	4	1	0	0	0	0	0	0	0	>=7	>=7	0	0	0	0	39.1	26.2891	0	2011
5.5-5.9	4	0	0	0	0	0	1	0	0	>=7	>=7	0	0	0	0	43.7	24.1288	1	2012
5.5-5.9	4	0	0	0	0	0	0	0	0	>=7	>=7	0	0	0	0	35.4	28.0102	0	2012
5.5-5.9	4	0	0	0	0	1	0	0	0	>=7	>=7	0	0	0	0	34.6	21.9076	0	2007
5.0-5.4	3	0	0	0	0	0	0	0	0	>=7	>=7	0	0	0	0	26.4	27.2544	1	2011
4.5-4.9	2	1	0	0	0	1	0	0	0	>=7	>=7	1	0	0	0	33.7	23.7943	0	2011
5.5-5.9	4	1	0	0	0	0	0	0	0	>=7	>=7	0	0	0	0	32.7	26.4314	1	2008
5.0-5.4	3	0	0	0	0	0	0	0	0	>=7	>=7	0	0	0	0	25.3	26.3147	1	2012
5.5-5.9	4	1	0	0	0	0	0	0	0	>=7	>=7	0	0	0	0	35.1	34.1749	0	2011
5.0-5.4	3	0	0	0	0	0	0	0	0	>=7	>=7	0	0	0	0	32.7	25.5296	0	2008
5.5-5.9	4	1	0	0	0	0	0	0	0	>=7	>=7	0	0	0	0	44.4	32.8824	0	2011
4.5-4.9	2	1	0	0	0	0	0	0	0	>=7	>=7	0	0	0	0	33.9	28.4375	1	2013
5.5-5.9	4	0	0	0	0	0	0	0	0	>=7	>=7	0	0	0	0	32.3	25.0399	1	2009
5.5-5.9	4	0	0	0	0	0	0	0	0	>=7	>=7	0	0	0	0	35.8	23.6246	0	2013
5.5-5.9	4	0	0	0	0	0	0	0	0	>=7	>=7	0	0	0	0	26	22.8624	0	2007
5.5-5.9	4	1	0	0	0	0	0	0	0	>=7	>=7	0	0	0	0	35.9	27.7441	1	2011
4.5-4.9	2	1	0	0	0	0	0	0	0	>=7	>=7	0	0	0	0	28.5	25.7971	1	2012
5.0-5.4	3	0	0	0	0	0	0	0	0	>=7	>=7	0	0	0	0	29.7	32.1875	1	2006
>=7	7	1	0	0	0	0	0	0	0	>=7	>=7	0	1	0	1	33.9	41.381	0	2008
5.5-5.9	4	0	0	0	0	0	0	0	0	>=7	>=7	0	0	0	0	36.6	26.1674	0	2009
5.0-5.4	3	0	0	0	0	0	0	0	0	>=7	>=7	0	0	0	0	37.3	33.0876	0	2013
6.0-6.4	5	0	0	0	0	0	0	0	0	>=7	>=7	0	0	0	0	29.3	29.2421	0	2010
4.5-4.9	2	1	0	0	0	0	0	0	0	>=7	>=7	0	0	0	0	35	24.5826	0	2013
5.0-5.4	3	1	0	0	0	0	0	0	0	>=7	>=7	0	0	0	0	34.1	27.2653	0	2013
5.5-5.9	4	0	0	1	0	0	0	0	0	>=7	>=7	0	0	0	0	26.9	28.2807	0	2011
5.5-5.9	4	0	0	0	0	0	1	0	1	>=7	>=7	0	0	0	0	25.9	34.0237	1	2006
5.5-5.9	4	0	0	0	0	0	0	0	0	>=7	>=7	0	0	0	0	27	32.9274	0	2007
5.5-5.9	4	0	0	0	0	0	0	0	0	>=7	>=7	0	0	0	0	31.4	29.6833	1	2012
5.0-5.4	3	1	0	0	0	1	0	0	0	>=7	>=7	0	0	0	1	40.1	26.2227	0	2011
6.0-6.4	5	0	0	0	0	0	0	0	0	>=7	>=7	0	0	0	0	40.8	27.1158	0	2009
6.0-6.4	5	0	0	0	0	1	0	0	0	>=7	>=7	0	0	0	0	31.7	28.8754	0	2009
5.5-5.9	4	0	0	0	0	0	0	0	0	>=7	>=7	0	0	0	0	26	27.079	0	2011
5.5-5.9	4	0	0	0	0	0	0	0	0	>=7	>=7	0	0	0	0	28.7	24.6904	1	2008
5.5-5.9	4	0	0	1	0	0	0	0	0	>=7	>=7	0	0	0	0	31.9	26.1564	0	2011
6.0-6.4	5	0	0	0	0	0	0	0	0	>=7	>=7	0	0	0	0	32.2	32.2064	0	2011
5.5-5.9	4	0	0	0	0	0	0	0	0	>=7	>=7	0	0	0	0	33.4	25.7117	1	2011
5.0-5.4	3	0	0	0	0	0	0	0	0	>=7	>=7	0	0	0	0	24.4	25.6319	0	2013
5.5-5.9	4	1	1	1	0	0	0	0	0	>=7	>=7	0	0	0	0	34.6	24.8389	0	2009
1.<4.5	1	1	1	1	0	0	0	0	0	>=7	>=7	0	0	0	0	29.1	27.3439	1	2007
4.5-4.9	2	0	0	1	0	0	0	0	0	>=7	>=7	0	0	0	0	32	23.8054	0	2011
5.0-5.4	3	0	0	0	0	0	0	0	0	>=7	>=7	0	0	0	0	31.2	31.3801	1	2009
5.0-5.4	3	0	0	0	0	1	0	0	0	>=7	>=7	0	0	0	0	34.7	26.0561	0	2011
5.0-5.4	3	1	0	0	0	0	0	0	0	>=7	>=7	0	0	0	0	28.7	31.3007	1	2012
5.5-5.9	4	1	0	0	0	0	0	0	0	>=7	>=7	0	0	0	0	34.5	26.3702	0	2007
5.0-5.4	3	1	0	0	0	0	0	0	0	>=7	>=7	0	0	0	0	33.1	19.2969	0	2011
5.5-5.9	4	1	0	0	0	0	0	0	0	>=7	>=7	0	0	0	0	38.1	36.6749	0	2013
5.0-5.4	3	1	0	0	0	0	0	0	0	>=7	>=7	0	0	0	0	28	24.3865	1	2008
6.0-6.4	5	1	0	0	0	0	0	0	0	>=7	>=7	0	0	0	1	27.6	31.6406	1	2008
5.5-5.9	4	0	0	0	0	0	0	0	0	>=7	>=7	0	0	0	0	29.7	28.3203	1	2006
5.5-5.9	4	0	0	0	0	0	0	0	0	>=7	>=7	0	0	0	0	33.6	27.024	0	2011
4.5-4.9	2	0	0	0	0	0	0	0	0	>=7	>=7	0	0	0	0	26	24.0205	0	2007
5.0-5.4	3	1	0	0	0	0	0	0	0	>=7	>=7	1	0	0	0	35.2	22.9531	1	2012
1.<4.5	1	0	0	0	0	0	0	0	0	>=7	>=7	1	0	0	0	44.8	24.7443	0	2011
5.5-5.9	4	1	0	0	0	1	0	0	0	<7	>=7	0	0	0	1	35.5	31.1846	0	2006
5.5-5.9	4	0	0	0	0	0	0	0	0	>=7	>=7	0	0	0	0	35.2	29.2969	0	2010
5.0-5.4	3	1	0	0	0	0	0	0	0	>=7	>=7	1	0	0	0	37.9	23.3377	0	2012
5.0-5.4	3	0	0	0	0	0	0	0	0	>=7	>=7	0	0	0	0	28.4	30.572	0	2007
5.5-5.9	4	0	0	0	0	0	0	0	0	>=7	>=7	0	0	0	0	33.3	24.7906	1	2010
5.0-5.4	3	1	0	0	0	0	0	0	0	>=7	>=7	0	0	0	0	32.9	32.4661	0	2011
5.5-5.9	4	0	0	0	0	1	0	0	0	>=7	>=7	0	0	0	1	39.4	29.5955	0	2012
5.5-5.9	4	0	0	0	0	0	0	0	0	>=7	>=7	0	0	0	0	28.8	27.7979	1	2012
5.0-5.4	3	0	0	0	0	0	0	0	0	>=7	>=7	0	0	0	0	26.1	26.6965	1	2006
5.0-5.4	3	0	0	0	0	0	1	0	0	>=7	>=7	0	0	0	0	30.5	25.9107	0	2011
5.0-5.4	3	0	0	0	0	1	0	0	0	>=7	>=7	0	0	0	0	36.7	30.4687	0	2011
5.5-5.9	4	0	0	0	1	0	0	0	0	>=7	>=7	0	0	0	0	30.4	29.5083	1	2011
6.0-6.4	5	0	0	0	0	1	0	1	1	>=7	>=7	0	0	0	0	32.7	37.6172	1	2010
5.0-5.4	3	0	0	0	0	0	0	0	0	>=7	>=7	0	0	0	0	33	23.4236	1	2012
5.5-5.9	4	0	0	0	0	0	0	0	0	>=7	>=7	0	0	0	0	33.1	27.9421	0	2009
5.5-5.9	4	0	0	0	0	0	0	0	0	>=7	>=7	1	0	0	0	26.1	27.7333	1	2012
5.0-5.4	3	0	0	0	0	0	0	0	0	>=7	>=7	0	0	0	0	30.3	25.9375	0	2010
5.0-5.4	3	0	0	0	0	0	0	0	0	>=7	>=7	0	0	0	0	32.5	23.6719	0	2007
4.5-4.9	2	0	0	0	0	1	0	0	0	>=7	>=7	0	0	0	0	32	25.3444	0	2013
4.5-4.9	2	0	0	0	0	0	0	0	0	>=7	>=7	0	0	0	0	30.5	22.0948	0	2012
5.0-5.4	3	1	0	0	0	0	0	0	0	>=7	>=7	0	0	0	0	31.6	30.0215	0	2007
5.5-5.9	4	1	0	0	0	0	0	0	0	>=7	>=7	0	0	0	0	31.2	34.664	0	2011
5.5-5.9	4	0	0	0	0	0	0	0	1	>=7	>=7	0	0	0	0	29.5	28.8015	0	2009
4.5-4.9	2	0	0	0	0	0	0	0	0	>=7	>=7	0	0	0	0	31.8	25.4767	0	2012
5.5-5.9	4	1	0	0	0	0	0	0	0	>=7	>=7	0	0	0	0	43.5	24.6094	0	2006
4.5-4.9	2	0	0	0	0	0	1	0	0	>=7	>=7	0	0	0	0	36.4	22.9624	0	2009
5.0-5.4	3	0	0	0	0	0	0	0	0	>=7	>=7	0	0	0	0	27.8	30.7737	1	2010
6.0-6.4	5	0	0	0	0	0	0	0	0	>=7	>=7	0	0	0	0	24.9	30.8642	0	2013
5.0-5.4	3	0	0	0	0	0	0	0	0	>=7	>=7	0	0	0	0	19.9	22.4059	1	2010
4.5-4.9	2	0	0	0	0	0	0	0	0	>=7	>=7	0	0	0	0	27.4	26.7187	1	2007
5.5-5.9	4	1	0	0	0	0	0	0	0	>=7	>=7	0	0	0	0	30.5	25.4864	1	2012
4.5-4.9	2	1	0	0	0	0	0	0	0	>=7	>=7	0	0	0	0	27.4	24.6133	0	2007
5.0-5.4	3	0	0	0	0	0	0	1	0	>=7	>=7	0	0	0	0	32.4	22.5	1	2006
4.5-4.9	2	0	0	0	0	0	0	0	0	>=7	>=7	0	0	0	0	37.5	22.3437	0	2011
6.0-6.4	5	0	0	0	0	1	0	0	0	>=7	>=7	0	0	0	1	36.4	30.8329	1	2010
6.5-6.9	6	0	0	0	0	0	0	0	0	>=7	>=7	0	0	0	0	38.4	31.198	0	2012
5.5-5.9	4	0	0	0	0	0	0	0	0	>=7	>=7	0	0	0	0	27.3	25.625	1	2013
5.0-5.4	3	0	0	0	0	0	0	0	0	>=7	>=7	0	0	0	0	30.5	25.8834	1	2011
5.0-5.4	3	0	0	0	0	0	0	0	0	>=7	>=7	0	0	0	0	33	28.8889	0	2012
5.0-5.4	3	0	0	0	0	0	0	0	0	>=7	>=7	0	0	0	1	34.1	28.4444	1	2008
5.5-5.9	4	0	0	0	0	0	0	0	0	>=7	>=7	0	0	0	0	32.4	24.841	0	2010
5.0-5.4	3	0	0	0	0	0	0	0	0	>=7	>=7	0	0	0	0	31	27.2392	1	2009
5.0-5.4	3	0	0	0	0	1	0	0	0	>=7	>=7	1	0	0	1	27.8	28.4196	1	2010
6.0-6.4	5	1	1	0	0	0	0	0	0	>=7	>=7	0	1	0	0	39.9	33.1843	0	2008
>=7	7	1	0	0	0	1	0	0	1	>=7	>=7	0	0	0	1	27.2	34.375	1	2011
5.0-5.4	3	1	0	0	0	0	0	0	0	>=7	>=7	0	1	0	0	31	32.4467	0	2008
5.0-5.4	3	0	0	0	0	0	0	0	0	>=7	>=7	0	0	0	0	30.5	31.3214	1	2012
5.0-5.4	3	0	0	0	0	0	0	0	0	>=7	>=7	0	0	0	0	27.9	31.0889	1	2007
5.0-5.4	3	1	0	0	0	0	0	0	0	>=7	>=7	0	0	0	0	39.5	32.4557	0	2008
5.0-5.4	3	0	0	0	0	0	0	0	0	>=7	>=7	0	0	0	0	28.4	21.4681	0	2013
4.5-4.9	2	0	0	0	0	0	0	0	0	>=7	>=7	0	0	0	0	31.9	27.9421	1	2007
1.<4.5	1	1	1	1	0	0	0	0	0	>=7	>=7	0	0	0	0	27.6	26.5625	0	2007
5.5-5.9	4	0	0	0	0	0	0	0	0	>=7	>=7	0	0	0	0	33.9	20.83	1	2010
5.0-5.4	3	0	0	0	0	0	0	0	0	>=7	>=7	0	0	0	0	33.6	25.9375	0	2010
5.0-5.4	3	1	0	0	0	0	0	0	0	>=7	>=7	0	0	0	0	33.3	27.0552	0	2012
5.5-5.9	4	1	0	0	0	0	0	0	0	>=7	>=7	0	0	0	0	29.4	32.4219	0	2010
5.5-5.9	4	1	0	0	0	1	0	0	0	>=7	>=7	0	0	0	0	30.8	29.4022	1	2011
5.0-5.4	3	1	0	0	0	1	0	0	0	>=7	>=7	0	0	0	1	37.3	25.3906	0	2007
5.0-5.4	3	0	0	0	0	1	0	0	0	>=7	>=7	0	0	0	0	30.1	33.0237	1	2008
5.5-5.9	4	1	0	0	0	1	0	0	1	<7	>=7	1	0	0	1	34.2	27.4656	1	2009
5.0-5.4	3	0	0	0	0	0	0	0	0	>=7	>=7	0	0	0	0	29.5	28.0404	1	2007
5.5-5.9	4	0	0	0	0	0	0	0	0	>=7	>=7	0	0	0	0	30.9	26.3702	0	2009
6.0-6.4	5	1	0	0	0	0	0	0	0	>=7	>=7	0	0	0	0	32	23.7109	0	2010
5.5-5.9	4	0	0	0	0	0	0	0	0	>=7	>=7	0	0	0	0	31.9	26.7229	0	2010
5.0-5.4	3	1	0	0	0	0	0	0	0	>=7	>=7	0	0	0	0	34.9	24.4745	1	2006
4.5-4.9	2	1	0	0	0	0	0	0	0	>=7	>=7	0	0	0	0	30.2	29.5121	0	2011
5.5-5.9	4	1	0	0	0	0	0	0	0	>=7	>=7	0	0	0	0	29.9	23.0148	1	2007
5.5-5.9	4	1	0	0	0	0	0	0	0	>=7	>=7	0	0	0	0	32.3	25.3772	0	2009
5.5-5.9	4	1	0	1	0	0	0	0	0	>=7	>=7	0	0	0	0	33.2	25.204	0	2007
5.5-5.9	4	0	0	0	0	0	0	0	0	<7	>=7	0	0	0	1	35.6	23.7253	0	2010
5.0-5.4	3	1	1	1	0	0	0	0	0	>=7	>=7	0	0	0	0	30.8	35.0765	1	2008
6.0-6.4	5	1	0	0	0	1	0	0	0	>=7	>=7	0	0	0	0	34.4	28.0234	0	2011
5.0-5.4	3	1	0	0	0	0	0	0	0	>=7	>=7	0	0	0	0	27.3	22.5466	0	2008
4.5-4.9	2	1	0	0	0	0	0	0	0	>=7	>=7	0	0	0	0	25.1	24.6904	1	2007
5.0-5.4	3	1	0	0	0	0	0	0	0	>=7	>=7	0	0	0	0	26.3	22.71	0	2008
5.0-5.4	3	1	0	0	0	0	0	0	0	>=7	>=7	0	0	0	0	35.2	20.3244	0	2007
5.0-5.4	3	0	0	0	0	0	0	0	0	>=7	>=7	0	0	0	0	33.9	24.8442	0	2008
5.0-5.4	3	1	1	1	0	0	0	0	0	>=7	>=7	0	0	0	0	29	24.0079	1	2006
5.0-5.4	3	0	0	0	0	0	0	0	0	>=7	>=7	0	0	0	0	32	24.3107	0	2012
5.5-5.9	4	0	0	0	0	0	0	0	0	>=7	>=7	0	0	0	0	32.4	24.093	1	2006
5.5-5.9	4	0	0	0	0	0	0	0	0	>=7	>=7	0	0	0	0	30	26.4381	0	2011
6.0-6.4	5	1	0	0	0	0	0	0	0	>=7	>=7	0	0	0	0	35.3	27.2062	0	2008
5.0-5.4	3	0	0	0	0	0	0	0	0	>=7	>=7	0	0	0	0	31.1	22.5575	1	2008
5.5-5.9	4	0	0	0	0	0	0	0	0	>=7	>=7	0	0	0	1	41.1	22.1442	0	2012
5.0-5.4	3	0	0	0	0	0	0	0	0	>=7	>=7	0	0	0	0	31.3	26.7916	0	2011
5.0-5.4	3	0	0	0	0	0	0	0	0	>=7	>=7	0	0	0	1	33.4	26.3396	0	2013
5.5-5.9	4	0	0	0	0	0	0	1	0	>=7	>=7	0	0	0	0	32.6	27.3047	0	2009
5.0-5.4	3	0	0	0	0	0	0	0	0	>=7	>=7	0	0	0	0	34.5	26.9531	0	2011
5.5-5.9	4	0	0	0	0	1	0	0	0	>=7	>=7	0	0	0	0	31.4	25.6312	0	2009
5.0-5.4	3	1	1	1	0	0	0	0	0	>=7	>=7	0	0	0	1	23.2	28.441	1	2007
5.0-5.4	3	0	0	0	0	1	0	0	0	>=7	>=7	1	0	0	1	29.9	25.9375	1	2008
5.0-5.4	3	0	0	0	0	0	0	0	0	>=7	>=7	0	0	0	0	34.6	26.5625	0	2012
5.0-5.4	3	0	0	0	0	0	1	0	0	>=7	>=7	0	0	0	0	27.9	23.3343	1	2008
1.<4.5	1	0	0	1	0	0	0	0	0	>=7	>=7	0	0	0	0	38	29.4531	0	2012
5.0-5.4	3	1	1	1	0	0	0	0	0	>=7	>=7	0	0	0	0	25	30.3233	1	2012
5.5-5.9	4	0	0	0	0	0	0	0	0	>=7	>=7	0	0	0	0	31.3	26.5095	0	2009
4.5-4.9	2	0	0	0	0	0	0	0	0	>=7	>=7	0	0	0	0	36	26.497	1	2011
5.5-5.9	4	1	0	0	0	0	0	0	0	>=7	>=7	0	0	0	0	34.9	28.7553	1	2010
4.5-4.9	2	1	1	1	0	0	0	0	0	>=7	>=7	0	0	0	0	30.1	26.4024	1	2012
6.0-6.4	5	1	0	0	0	0	0	0	0	>=7	>=7	0	0	0	0	34.5	27.6379	1	2011
5.0-5.4	3	1	0	0	0	0	0	0	0	>=7	>=7	0	0	0	0	33.9	43.6599	0	2006
5.0-5.4	3	1	0	0	0	0	0	0	0	>=7	>=7	0	0	0	0	30.4	28.9303	0	2012
5.5-5.9	4	0	0	0	0	0	0	0	0	>=7	>=7	1	0	0	1	37.9	21.7969	1	2012
5.5-5.9	4	0	0	0	0	0	0	0	0	>=7	>=7	0	0	0	0	28.7	33.544	0	2008
5.0-5.4	3	0	0	0	0	0	0	0	0	>=7	>=7	0	0	0	0	31.4	26.4381	0	2012
5.5-5.9	4	0	0	1	0	0	0	0	1	>=7	>=7	0	0	0	0	30	31.25	0	2013
6.0-6.4	5	1	0	0	0	0	0	0	0	>=7	>=7	0	0	0	0	38.7	25.5937	1	2009
5.0-5.4	3	0	0	0	0	0	0	0	0	>=7	>=7	0	0	0	0	29	26.3668	1	2007
5.0-5.4	3	0	0	0	0	0	0	0	0	>=7	>=7	0	0	0	0	33.6	27.6995	0	2011
5.0-5.4	3	0	0	0	0	0	0	0	0	>=7	>=7	0	0	0	0	30.8	22.9421	1	2012
5.5-5.9	4	1	0	0	0	0	0	0	0	>=7	>=7	0	0	0	0	33.1	25.8834	0	2010
5.5-5.9	4	0	0	0	0	0	0	0	0	>=7	>=7	1	0	0	0	28.4	28.5665	1	2008
5.0-5.4	3	0	0	0	0	0	0	0	0	>=7	>=7	0	0	0	0	23.1	28.7396	1	2010
5.0-5.4	3	0	0	0	0	1	0	0	0	>=7	>=7	0	0	0	0	24.9	23.8417	0	2012
5.5-5.9	4	0	0	0	0	0	0	0	0	>=7	>=7	0	0	0	0	28	33.5937	1	2011
5.0-5.4	3	0	0	0	0	0	0	0	0	>=7	>=7	0	0	0	0	30.3	31.7187	0	2013
5.0-5.4	3	1	0	0	0	0	0	0	0	>=7	>=7	0	0	0	0	28.1	24.974	0	2007
4.5-4.9	2	0	0	0	0	0	0	0	0	>=7	>=7	0	0	0	0	27.5	21.2853	1	2011
4.5-4.9	2	0	0	0	0	0	0	0	0	<7	>=7	1	0	0	1	30.6	23.9188	0	2012
5.0-5.4	3	0	0	0	0	0	0	0	0	>=7	>=7	0	0	0	0	30.4	24.1795	1	2009
4.5-4.9	2	0	0	1	0	0	0	0	0	>=7	>=7	0	0	0	0	32.6	24.3418	0	2011
5.0-5.4	3	0	0	0	0	0	0	0	0	>=7	>=7	0	0	0	0	34	26.0584	0	2010
5.5-5.9	4	0	0	1	0	0	0	0	0	>=7	>=7	0	0	0	0	31.9	26.9274	0	2011
4.5-4.9	2	1	1	1	0	0	0	0	0	>=7	>=7	0	0	0	1	30.4	29.5036	1	2013
5.5-5.9	4	1	0	0	0	0	0	0	0	>=7	>=7	0	0	0	0	24	31.6456	0	2009
5.0-5.4	3	1	1	1	0	0	0	0	0	>=7	>=7	0	0	0	0	29.3	30.695	1	2012
5.5-5.9	4	1	0	0	0	0	0	0	0	>=7	>=7	0	0	0	0	28.1	26.1977	0	2006
5.5-5.9	4	0	0	0	0	0	0	0	0	>=7	>=7	0	0	0	0	33.3	23.1849	1	2009
6.5-6.9	6	0	0	0	0	1	0	0	0	>=7	>=7	1	0	0	1	30.6	36.9822	1	2010
5.0-5.4	3	0	0	0	0	0	0	0	0	>=7	>=7	0	0	0	0	28.2	25.0464	1	2010
5.0-5.4	3	0	0	1	0	0	0	0	0	>=7	>=7	0	0	0	0	29.8	23.9334	0	2012
5.5-5.9	4	0	0	0	0	0	0	0	0	>=7	>=7	0	0	0	0	25.8	26.4024	1	2010
5.5-5.9	4	0	0	0	0	0	0	0	0	>=7	>=7	0	0	0	0	30.7	29.2421	0	2008
5.0-5.4	3	0	0	1	0	0	0	0	0	>=7	>=7	0	0	0	0	30.1	31.0848	1	2011
5.5-5.9	4	1	0	0	0	1	0	0	0	>=7	>=7	0	0	0	0	37.1	28.1969	0	2011
5.5-5.9	4	1	0	0	0	0	0	0	0	>=7	>=7	0	0	0	0	36	31.2026	0	2007
5.0-5.4	3	0	0	1	0	0	0	0	0	>=7	>=7	0	0	0	0	34.6	26.4453	0	2009
5.5-5.9	4	0	0	0	0	0	0	0	0	>=7	>=7	0	0	0	0	30.1	26.2719	0	2009
5.0-5.4	3	1	0	0	0	0	0	0	0	>=7	>=7	0	0	0	0	36	31.1846	1	2010
5.5-5.9	4	0	0	0	0	0	0	0	0	>=7	>=7	0	0	0	0	31.6	29.983	0	2009
4.5-4.9	2	1	0	0	0	1	0	0	1	<7	>=7	1	0	0	1	40.4	26.4724	0	2013
6.5-6.9	6	1	0	0	0	0	0	0	1	>=7	>=7	0	0	0	0	37.8	42.7981	0	2012
5.5-5.9	4	1	0	0	0	0	0	0	0	>=7	>=7	0	0	0	0	36.3	31.2452	0	2011
5.0-5.4	3	0	0	0	0	0	0	0	0	>=7	>=7	0	0	0	0	32.8	26.7092	0	2013
5.0-5.4	3	1	1	1	0	0	0	0	0	>=7	>=7	0	0	0	0	35.9	26.3879	1	2012
5.5-5.9	4	0	0	0	0	0	0	0	0	>=7	>=7	0	0	0	0	34.6	24.0346	0	2009
4.5-4.9	2	0	0	1	0	0	1	0	0	>=7	>=7	0	0	0	0	33	23.833	1	2011
6.0-6.4	5	1	0	0	0	0	0	0	0	>=7	>=7	1	0	0	0	41.7	25.0761	1	2008
5.0-5.4	3	0	0	0	0	0	0	0	0	>=7	>=7	0	0	0	0	32.5	32.1263	1	2011
5.0-5.4	3	0	0	0	0	0	0	0	0	>=7	>=7	0	0	0	0	32.1	23.9545	1	2013
4.5-4.9	2	0	0	0	0	0	0	0	0	>=7	>=7	0	0	0	0	24.3	22.8659	1	2007
5.5-5.9	4	1	1	1	0	0	0	0	0	>=7	>=7	0	0	0	0	27.1	28.441	1	2006
6.0-6.4	5	1	1	1	0	0	0	0	1	>=7	>=7	0	0	0	0	30.3	28.0742	1	2008
5.0-5.4	3	0	0	0	0	0	0	0	0	>=7	>=7	0	0	0	0	28.8	25.7657	1	2009
5.5-5.9	4	1	0	0	0	0	0	0	0	>=7	>=7	0	0	0	0	34.5	29.0732	0	2008
5.5-5.9	4	0	0	0	0	0	0	0	0	>=7	>=7	0	0	0	0	31.2	25.6206	1	2009
5.0-5.4	3	0	0	0	0	0	0	0	0	>=7	>=7	0	0	0	0	32.1	24.9108	1	2011
5.0-5.4	3	0	0	0	0	0	1	0	0	>=7	>=7	0	0	0	0	25.3	24.4352	1	2012
5.5-5.9	4	1	0	0	0	0	0	0	0	>=7	>=7	0	0	0	0	32.9	24.0796	1	2008
5.0-5.4	3	0	0	0	0	1	0	0	0	>=7	>=7	1	0	0	0	30.2	30.854	1	2009
5.0-5.4	3	1	0	0	0	0	0	0	0	>=7	>=7	0	0	0	0	30.5	26.5565	1	2010
5.0-5.4	3	0	0	0	0	0	0	0	0	>=7	>=7	0	0	0	0	28.4	25.0331	1	2013
5.0-5.4	3	0	0	1	0	0	0	0	0	>=7	>=7	0	0	0	0	28.7	29.2969	0	2012
5.0-5.4	3	0	0	0	0	0	0	0	0	>=7	>=7	0	0	0	0	30	24.539	1	2009
5.0-5.4	3	0	0	0	0	0	0	0	0	>=7	>=7	0	0	0	0	32.5	23.3492	0	2012
5.0-5.4	3	0	0	0	0	0	0	0	0	>=7	>=7	0	0	0	1	28.6	24.762	0	2007
5.5-5.9	4	0	0	0	0	0	0	0	0	>=7	>=7	0	0	0	0	28.8	29.6094	0	2008
5.5-5.9	4	0	0	0	0	1	0	0	0	>=7	>=7	1	0	0	1	41.1	28.5156	1	2007
5.5-5.9	4	1	0	0	0	0	0	0	0	>=7	>=7	0	0	0	0	39.4	29.5159	0	2013
5.5-5.9	4	0	0	0	0	0	0	0	0	>=7	>=7	0	0	0	0	28.2	31.9691	1	2012
5.0-5.4	3	0	0	0	0	0	0	0	0	>=7	>=7	0	0	0	1	33.6	21.988	1	2013
5.0-5.4	3	0	0	0	0	0	0	0	0	>=7	>=7	0	0	0	0	32.9	25.4767	1	2009
5.5-5.9	4	0	0	0	0	0	0	0	0	>=7	>=7	0	0	0	0	26.7	29.3028	0	2007
4.5-4.9	2	0	0	0	0	0	0	0	0	>=7	>=7	0	0	0	0	40.2	22.6843	1	2011
6.0-6.4	5	0	0	0	0	0	0	0	0	>=7	>=7	0	0	0	0	33.7	24.6877	1	2007
4.5-4.9	2	0	0	1	0	0	0	0	0	>=7	>=7	0	0	0	0	29.6	23.1672	0	2012
5.0-5.4	3	0	0	0	0	0	0	0	0	>=7	>=7	0	0	0	0	31.3	23.125	1	2007
5.5-5.9	4	1	0	0	0	0	0	0	0	>=7	>=7	0	0	0	0	35.5	22.3537	0	2012
5.5-5.9	4	1	0	0	0	0	0	0	0	>=7	>=7	0	0	0	0	28.4	24.1406	1	2012
5.0-5.4	3	0	0	0	0	0	0	0	0	>=7	>=7	0	0	0	0	38.4	22.0181	1	2006
5.0-5.4	3	0	0	0	0	0	0	0	0	>=7	>=7	0	0	0	0	37.1	32.6953	0	2008
6.0-6.4	5	0	0	0	1	0	0	0	0	>=7	>=7	0	0	0	0	28.8	36.7865	1	2013
5.0-5.4	3	0	0	0	0	0	0	0	0	>=7	>=7	0	0	0	0	28.2	23.3885	1	2007
5.0-5.4	3	0	0	0	0	0	0	0	0	>=7	>=7	0	0	0	0	27.8	25.5588	1	2013
5.5-5.9	4	1	1	1	0	0	0	0	0	>=7	>=7	0	0	0	1	25.6	24.0346	1	2009
5.5-5.9	4	1	0	0	0	0	0	0	0	>=7	>=7	0	0	0	0	33.9	29.0418	0	2011
5.5-5.9	4	1	0	0	0	0	0	0	0	>=7	>=7	0	0	0	0	26.6	32.0461	1	2008
4.5-4.9	2	0	0	0	0	0	0	0	0	>=7	>=7	0	0	0	0	23	25.3966	1	2012
5.5-5.9	4	0	0	0	0	0	0	0	0	>=7	>=7	0	0	0	1	25.5	30.9404	1	2007
6.0-6.4	5	0	0	0	0	0	0	0	0	>=7	>=7	0	0	0	0	27.4	30.2545	0	2009
4.5-4.9	2	0	0	0	0	0	1	0	0	>=7	>=7	0	0	0	0	29.4	23.7007	1	2010
5.5-5.9	4	0	0	0	0	0	0	0	1	>=7	>=7	1	0	0	0	31.5	28.9282	1	2011
6.0-6.4	5	0	0	0	0	0	0	0	0	>=7	>=7	0	0	0	0	30.9	28.5665	0	2008
1.<4.5	1	0	0	0	0	0	0	0	0	>=7	>=7	0	0	0	0	33.6	25.2363	0	2012
5.0-5.4	3	1	0	0	0	0	0	0	0	>=7	>=7	0	0	0	0	37.7	27.7344	0	2007
6.0-6.4	5	1	0	0	0	0	0	0	0	>=7	>=7	0	0	0	0	35.1	26.7638	1	2009
5.0-5.4	3	0	0	0	0	0	0	0	0	>=7	>=7	0	0	0	0	30.1	29.7576	0	2008
5.0-5.4	3	0	0	0	0	0	0	0	0	>=7	>=7	0	0	0	0	25.1	24.841	1	2007
5.0-5.4	3	0	0	0	0	0	0	1	0	>=7	>=7	0	0	0	0	27.7	25.8953	1	2010
5.5-5.9	4	0	0	0	0	0	0	0	0	>=7	>=7	0	0	0	0	28.8		1	2010
5.5-5.9	4	1	0	0	0	0	0	0	0	>=7	>=7	0	0	0	0	40.1	25.3565	1	2012
5.5-5.9	4	0	0	0	0	0	0	0	0	>=7	>=7	0	0	0	0	35.8	24.2424	1	2009
5.5-5.9	4	1	0	0	0	0	0	0	1	>=7	>=7	1	0	0	1	33	26.8386	0	2009
5.0-5.4	3	0	0	0	0	0	0	0	0	>=7	>=7	0	0	0	0	34.2	22.3133	1	2013
5.5-5.9	4	0	0	0	0	0	0	0	0	>=7	>=7	0	0	0	1	35.3	30.3593	0	2007
4.5-4.9	2	0	0	0	0	0	0	0	0	>=7	>=7	1	0	0	0	28	25.6146	0	2011
5.5-5.9	4	1	0	0	0	1	0	0	0	>=7	>=7	1	0	0	1	36.7	25.9516	0	2008
5.0-5.4	3	0	0	1	0	0	0	0	0	>=7	>=7	0	0	0	0	34	25.3749	0	2012
5.0-5.4	3	1	0	1	0	0	0	0	0	>=7	>=7	0	0	0	0	31.9	26.3329	0	2011
5.5-5.9	4	0	0	0	0	0	1	0	1	>=7	>=7	0	0	0	0	34.4	32.2979	1	2009
5.5-5.9	4	1	0	0	0	0	0	0	0	>=7	>=7	0	0	0	0	30.6	33.3205	1	2011
5.5-5.9	4	0	0	0	0	0	0	0	0	>=7	>=7	0	0	0	0	39.7	27.6134	1	2012
5.5-5.9	4	1	1	1	0	0	0	0	0	>=7	>=7	0	0	0	0	27.3	30.1838	1	2008
5.0-5.4	3	0	0	0	0	0	0	0	0	>=7	>=7	1	0	0	0	33.4	28.1245	1	2008
5.5-5.9	4	0	0	0	0	0	0	0	0	>=7	>=7	0	0	0	0	34.9	28.7778	0	2009
5.5-5.9	4	0	0	0	0	0	0	0	0	>=7	>=7	0	0	0	0	26.6	25.3906	1	2008
5.5-5.9	4	0	0	1	0	0	0	0	0	>=7	>=7	0	0	0	0	31.7	20.7499	0	2008
5.0-5.4	3	1	0	0	0	1	0	0	0	>=7	>=7	0	0	0	0	29.5	31.4853	0	2012
4.5-4.9	2	0	0	0	0	0	0	0	0	>=7	>=7	1	0	0	0	24	30.4	1	2006
5.5-5.9	4	1	0	0	0	0	0	0	0	>=7	>=7	0	0	0	0	34	34.5638	0	2012
5.5-5.9	4	1	1	1	0	0	0	0	0	>=7	>=7	0	0	0	0	28.7	27.5111	1	2009
5.5-5.9	4	1	0	0	0	1	0	0	1	>=7	>=7	1	0	0	1	30.3	31.5582	1	2013
5.0-5.4	3	0	0	0	0	0	0	0	0	>=7	>=7	0	0	0	0	32.1	25.5469	0	2006
5.0-5.4	3	0	0	0	0	0	0	0	0	>=7	>=7	0	0	0	1	29.3	25.3966	1	2006
5.5-5.9	4	0	0	0	0	0	0	0	0	>=7	>=7	0	0	0	0	24.6	23.5613	1	2011
5.0-5.4	3	0	0	0	0	1	0	0	0	>=7	>=7	0	0	0	0	35.9	28.2797	1	2012
5.5-5.9	4	0	0	0	0	0	0	0	1	>=7	>=7	0	0	0	0	32.8	40.1219	1	2012
5.0-5.4	3	1	1	1	0	0	0	0	0	>=7	>=7	0	0	0	0	40	26.6114	1	2008
5.0-5.4	3	1	0	0	0	0	0	0	0	>=7	>=7	0	0	0	0	27.8	32.6255	1	2009
5.0-5.4	3	1	0	0	0	0	0	0	0	>=7	>=7	0	0	0	0	31	32.6006	0	2012
4.5-4.9	2	0	0	0	0	0	0	0	0	>=7	>=7	0	0	0	0	27.6	26.358	1	2008
5.0-5.4	3	1	0	0	0	0	0	0	0	>=7	>=7	0	0	0	0	34.2	22.9481	1	2007
5.0-5.4	3	0	0	0	0	0	0	0	0	>=7	>=7	0	0	0	0	19.1	26.6389	1	2013
5.0-5.4	3	1	0	0	0	0	0	0	0	>=7	>=7	0	0	0	0	29.7	24.5954	1	2011
5.5-5.9	4	1	0	0	0	0	0	0	0	>=7	>=7	0	0	0	0	41.7	31.1846	0	2012
5.5-5.9	4	0	0	0	0	0	0	0	0	>=7	>=7	0	0	0	0	24.1	25.2363	0	2006
4.5-4.9	2	0	0	0	0	0	0	0	0	>=7	>=7	0	0	0	0	31.4	26.1977	1	2010
5.5-5.9	4	0	0	0	0	0	0	0	0	>=7	>=7	0	0	0	0	34.3	26.2493	1	2012
5.0-5.4	3	1	0	0	0	0	0	0	0	>=7	>=7	0	0	0	0	35.9	28.0404	0	2010
5.0-5.4	3	1	0	0	0	0	0	0	1	>=7	>=7	0	0	0	0	38.1	33.1504	1	2011
5.0-5.4	3	0	0	0	0	1	0	0	0	>=7	>=7	0	0	0	1	35.2	30.4898	1	2007
5.0-5.4	3	0	0	0	0	0	0	0	0	>=7	>=7	0	0	0	0	37.4	33.6128	0	2009
5.0-5.4	3	0	0	0	0	0	0	0	0	>=7	>=7	0	0	0	0	31.4	27.7767	1	2008
5.5-5.9	4	1	0	0	0	0	0	0	0	>=7	>=7	0	0	0	0	32.1	26.2976	1	2011
5.0-5.4	3	1	0	0	0	0	0	0	0	>=7	>=7	0	0	0	0	33.6	24.266	1	2012
5.5-5.9	4	1	0	0	0	0	0	0	1	>=7	>=7	0	0	0	0	34.7	33.834	0	2008
6.0-6.4	5	0	0	0	0	0	0	0	0	>=7	>=7	0	0	0	0	26.2	28.0957	0	2007
5.0-5.4	3	1	0	0	0	0	0	0	0	>=7	>=7	0	0	0	0	38.8	30.2836	0	2006
5.0-5.4	3	0	0	0	0	0	0	0	0	>=7	>=7	0	0	0	0	27	23.1473	1	2009
5.5-5.9	4	0	0	0	0	0	0	0	0	>=7	>=7	0	0	0	0	38	23.4375	0	2008
5.0-5.4	3	1	0	0	0	0	0	0	0	>=7	>=7	0	0	0	0	34.4	29.0174	0	2013
4.5-4.9	2	0	0	0	0	0	0	0	0	>=7	>=7	0	0	0	0	38.1	27.8801	1	2011
5.5-5.9	4	0	0	0	0	0	0	0	0	>=7	>=7	0	0	0	0	29.6	26.3281	0	2009
5.0-5.4	3	0	0	0	0	0	0	0	0	>=7	>=7	0	0	0	0	31.1	24.375	0	2010
5.0-5.4	3	0	0	0	0	0	1	0	0	>=7	>=7	0	0	0	0	30.1	33.6839	1	2012
5.0-5.4	3	0	0	0	0	0	0	0	0	>=7	>=7	0	0	0	0	23.7	23.0469	1	2011
5.0-5.4	3	0	0	0	0	0	0	0	0	>=7	>=7	0	0	0	0	36.6	24.4473	1	2013
5.0-5.4	3	1	0	0	0	0	0	0	1	>=7	>=7	0	0	0	0	27.8	31.4052	1	2006
5.0-5.4	3	1	0	1	0	0	0	0	0	>=7	>=7	0	0	0	0	32.2	29.5083	0	2011
6.0-6.4	5	0	0	0	0	1	0	0	1	>=7	>=7	1	0	0	1	33.4	28.536	1	2007
>=7	7	1	0	0	0	0	0	0	0	>=7	>=7	0	0	0	0	35.9	27.3399	0	2010
5.0-5.4	3	1	1	1	0	0	0	0	0	>=7	>=7	0	0	0	0	35.8	26.5338	1	2011
4.5-4.9	2	1	0	0	0	0	0	0	0	>=7	>=7	0	0	0	0	38.1	28.3039	0	2013
5.0-5.4	3	0	0	0	0	0	0	0	0	>=7	>=7	0	0	0	0	31.5	28.4711	0	2008
5.0-5.4	3	0	0	0	0	0	0	0	0	>=7	>=7	0	0	0	0	35.2	24.3248	1	2010
5.5-5.9	4	0	0	0	0	0	0	0	0	>=7	>=7	0	0	0	0	25.5	30.2344	1	2011
5.5-5.9	4	0	0	0	0	0	0	0	1	>=7	>=7	1	0	0	1	27	29.9219	0	2012
5.5-5.9	4	1	0	0	0	1	0	0	1	>=7	>=7	0	0	0	0	31.4	26.5643	0	2012
4.5-4.9	2	0	0	0	0	0	0	0	0	>=7	>=7	0	0	0	0	26.6	20.202	1	2010
4.5-4.9	2	0	0	0	0	0	0	0	0	>=7	>=7	0	0	0	0	29.4	20.0551	0	2012
5.5-5.9	4	1	0	0	0	0	0	0	1	>=7	>=7	0	0	0	0	33.9	23.0155	0	2008
5.5-5.9	4	0	0	0	0	0	0	0	0	>=7	>=7	0	0	0	0	34.1	27.1621	0	2012
4.5-4.9	2	0	0	0	0	0	0	0	0	>=7	>=7	0	0	0	0	27.9	29.0091	1	2006
5.0-5.4	3	0	0	0	0	0	0	0	0	>=7	>=7	0	0	0	0	32.5	32.1981	0	2011
4.5-4.9	2	1	0	0	0	0	0	0	0	>=7	>=7	0	0	0	0	33	30.7306	0	2007
4.5-4.9	2	0	0	0	0	0	0	0	0	>=7	>=7	0	0	0	0	33.9	27.0389	1	2009
6.0-6.4	5	0	0	0	1	0	0	0	0	>=7	>=7	0	0	0	1	25	30.5333	1	2009
5.5-5.9	4	0	0	0	0	0	0	0	0	>=7	>=7	0	0	0	0	29.2	30.6667	0	2013
5.5-5.9	4	0	0	0	0	0	0	0	0	>=7	>=7	0	0	0	0	34.2	27.1203	0	2010
5.5-5.9	4	1	0	0	0	0	0	0	0	>=7	>=7	0	0	0	0	26.6	24.435	1	2011
5.0-5.4	3	0	0	0	0	0	0	0	0	>=7	>=7	0	0	0	0	29.1	24.2969	0	2013
4.5-4.9	2	1	0	0	0	0	0	0	0	>=7	>=7	0	0	0	0	29.5	25.3906	0	2008
5.5-5.9	4	1	0	0	0	0	0	0	0	>=7	>=7	0	0	0	0	34.8	29.911	1	2012
6.0-6.4	5	0	0	0	1	0	0	0	0	>=7	>=7	0	0	0	0	32.5	29.2187	0	2009
5.0-5.4	3	0	0	0	0	0	0	0	0	>=7	>=7	0	0	0	0	24	25.4069	0	2012
5.0-5.4	3	0	0	0	0	0	0	0	0	>=7	>=7	0	0	0	0	26.5	21.6141	1	2009
5.0-5.4	3	1	0	0	0	0	0	0	0	>=7	>=7	0	0	0	0	31.3	26.2985	0	2006
5.0-5.4	3	1	1	1	0	0	0	0	0	>=7	>=7	0	0	0	0	29.5	22.6602	1	2011
5.0-5.4	3	1	0	0	0	0	0	0	0	>=7	>=7	0	0	0	0	29.8	25.625	0	2008
5.0-5.4	3	0	0	0	0	1	0	0	0	>=7	>=7	0	0	0	0	31.2	30.1103	1	2011
5.0-5.4	3	0	0	0	0	0	0	0	0	>=7	>=7	0	0	0	0	29.6	23.2812	1	2012
5.0-5.4	3	1	0	0	0	0	0	0	0	>=7	>=7	0	0	0	0	33.3	26.3702	0	2011
5.0-5.4	3	1	0	0	0	0	0	0	0	>=7	>=7	0	0	0	0	35.1	25.6369	0	2013
4.5-4.9	2	0	0	0	0	0	0	0	0	>=7	>=7	0	0	0	0	29.2	24.9108	1	2013
5.0-5.4	3	0	0	0	0	0	0	0	0	>=7	>=7	0	0	0	0	31.5	28.7236	1	2013
5.0-5.4	3	0	0	0	0	0	0	0	0	>=7	>=7	0	0	0	0	31	25.4153	1	2009
5.0-5.4	3	0	0	1	0	0	0	0	0	>=7	>=7	0	0	0	0	34.3	24.9581	0	2012
5.5-5.9	4	0	0	0	0	0	0	0	0	>=7	>=7	0	0	0	1	24.6	35.4153	1	2008
5.5-5.9	4	0	0	0	0	0	0	0	0	>=7	>=7	0	0	0	0	30.9	31.7578	1	2009
5.0-5.4	3	0	0	0	0	0	0	0	0	>=7	>=7	0	0	0	0	33.9	26.8386	0	2008
5.5-5.9	4	0	0	0	0	0	0	0	0	>=7	>=7	0	0	0	0	36	24.6094	0	2010
5.0-5.4	3	1	1	1	0	0	0	0	0	>=7	>=7	0	0	0	0	26.3	25.2363	1	2008
5.0-5.4	3	0	0	0	0	0	0	0	0	>=7	>=7	0	0	0	0	30.8	27.1484	1	2008
5.5-5.9	4	0	0	1	0	0	0	0	0	>=7	>=7	0	0	0	0	37	29.3724	0	2013
5.0-5.4	3	0	0	1	0	0	0	0	0	>=7	>=7	0	0	0	0	32.2	30.7658	0	2012
5.0-5.4	3	0	0	0	0	1	0	0	0	>=7	>=7	1	0	0	1	34	31.5289	1	2008
5.5-5.9	4	0	0	0	0	1	0	0	0	>=7	>=7	0	0	0	0	29.1	24.5578	1	2007
5.0-5.4	3	0	0	0	0	0	0	0	0	>=7	>=7	0	0	0	0	29.7	21.6311	1	2009
5.0-5.4	3	0	0	0	0	0	0	0	0	>=7	>=7	0	0	0	0	29.7	25.0761	1	2010
4.5-4.9	2	0	0	0	0	0	0	0	0	>=7	>=7	0	0	0	0	31.4	23.5139	0	2012
5.0-5.4	3	0	0	0	0	0	0	0	0	>=7	>=7	0	0	0	0	27.4	23.6323	1	2009
5.0-5.4	3	0	0	0	0	0	0	0	0	>=7	>=7	0	0	0	0	27.6	24.7656	1	2008
6.0-6.4	5	0	0	1	0	0	0	0	0	>=7	>=7	0	0	0	0	31.8	26.1066	0	2012
5.0-5.4	3	0	0	0	0	0	0	0	0	>=7	>=7	0	0	0	0	30.5	26.2985	0	2008
4.5-4.9	2	0	0	0	0	0	0	0	0	>=7	>=7	0	0	0	0	39	24.1787	1	2011
5.0-5.4	3	1	0	0	0	0	0	0	0	>=7	>=7	0	0	0	0	34.3	28.2284	0	2011
6.5-6.9	6	1	1	0	0	0	0	0	0	>=7	>=7	0	1	0	0	32.1	35.2183	0	2012
5.5-5.9	4	0	0	0	0	0	0	0	0	>=7	>=7	0	0	0	0	34.9	30.98	1	2012
5.5-5.9	4	0	0	0	0	0	0	0	0	>=7	>=7	0	0	0	0	29.5	29.1114	1	2008
5.5-5.9	4	0	0	1	0	0	0	0	0	>=7	>=7	0	0	0	0	31.6	29.1114	0	2010
5.5-5.9	4	0	0	0	0	0	0	0	0	>=7	>=7	0	0	0	0	37.2	21.7865	0	2008
5.0-5.4	3	0	0	0	0	0	0	0	0	>=7	>=7	0	0	0	0	31.3	20.3659	0	2008
5.5-5.9	4	0	0	0	0	0	0	0	0	>=7	>=7	0	0	0	0	29.8	23.5539	1	2010
5.0-5.4	3	0	0	0	0	0	0	0	0	>=7	>=7	0	0	0	0	31.7	23.2335	1	2011
4.5-4.9	2	0	0	0	0	0	0	0	0	>=7	>=7	0	0	0	0	25.2	22.4059	1	2013
1.<4.5	1	0	0	0	0	0	0	0	0	>=7	>=7	0	0	0	0	25.2	35.3798	0	2006
5.0-5.4	3	0	0	1	0	0	0	0	0	>=7	>=7	0	0	0	0	35.9	23.1247	0	2012
5.0-5.4	3	1	0	0	0	0	0	0	0	>=7	>=7	0	0	0	0	34.7	25.0761	0	2009
5.5-5.9	4	0	0	0	0	0	0	0	0	>=7	>=7	0	0	0	0	44.1	25.1532	1	2011
5.5-5.9	4	1	0	0	0	0	0	0	0	>=7	>=7	0	0	0	0	41.9	28.9617	0	2010
5.0-5.4	3	1	0	0	0	0	0	0	0	>=7	>=7	1	0	0	0	37.7	26.2377	0	2007
5.0-5.4	3	1	1	0	0	0	0	0	1	>=7	>=7	0	0	0	0	30.5	29.0625	1	2013
4.5-4.9	2	0	0	0	0	0	0	0	0	>=7	>=7	0	0	0	0	22.6	29.0564	1	2011
5.5-5.9	4	0	0	0	0	0	0	0	0	>=7	>=7	0	0	0	0	29.4	31.0046	0	2010
5.0-5.4	3	0	0	0	0	0	1	0	0	>=7	>=7	0	0	0	0	25.7	23.7118	1	2009
5.5-5.9	4	0	0	0	0	1	0	0	0	>=7	>=7	0	0	0	0	24.8	28.3848	1	2010
5.5-5.9	4	1	0	0	0	0	0	0	0	>=7	>=7	0	0	0	0	32.4	34.2058	0	2012
6.5-6.9	6	1	1	1	0	0	0	0	0	>=7	>=7	0	0	0	0	28.3	32.7449	1	2009
5.5-5.9	4	1	0	0	0	0	0	0	0	>=7	>=7	0	0	0	0	30.9	28.6398	0	2012
5.0-5.4	3	1	0	0	0	0	0	0	0	>=7	>=7	0	0	0	0	33	28.1083	1	2011
5.5-5.9	4	0	0	0	0	0	0	0	0	>=7	>=7	0	0	0	0	33.4	24.8358	0	2008
4.5-4.9	2	0	0	0	0	0	0	0	0	>=7	>=7	0	0	0	0	30.4	28.441	1	2007
5.5-5.9	4	0	0	0	0	1	0	0	0	>=7	>=7	0	0	0	1	30.9	29.34	0	2013
5.0-5.4	3	0	0	0	0	0	0	0	0	>=7	>=7	0	0	0	0	38.8	23.7954	1	2009
5.5-5.9	4	1	0	0	0	0	0	0	0	>=7	>=7	0	0	0	0	36.8	35.8594	0	2013
5.0-5.4	3	0	0	0	0	0	0	0	0	>=7	>=7	0	0	0	0	36.1	24.6097	0	2008
5.0-5.4	3	0	0	0	0	0	0	0	0	>=7	>=7	0	0	0	0	22.8	31.7535	0	2009
5.5-5.9	4	1	0	0	0	1	0	0	0	>=7	>=7	0	0	0	1	34.7	25.6574	0	2006
5.0-5.4	3	1	1	1	0	0	0	0	0	>=7	>=7	0	1	0	0	36.5	27.6562	0	2007
4.5-4.9	2	0	0	0	0	0	0	0	0	>=7	>=7	0	0	0	0	20.8	27.3437	1	2008
5.0-5.4	3	0	0	0	0	0	0	0	0	>=7	>=7	0	1	0	0	30.1	32.8473	1	2007
5.5-5.9	4	0	0	0	0	0	0	0	1	>=7	>=7	1	0	0	0	36.6	32.7672	0	2009
5.0-5.4	3	0	0	1	0	0	0	0	0	>=7	>=7	0	0	0	0	38.9	25.8773	1	2010
5.0-5.4	3	0	0	0	0	0	0	0	0	>=7	>=7	0	0	0	0	33.2	30.0433	0	2006
5.0-5.4	3	0	0	0	0	0	0	0	0	>=7	>=7	0	0	0	0	28	28.6851	1	2012
5.5-5.9	4	0	0	0	0	1	0	0	0	>=7	>=7	0	0	0	0	29.6	23.8017	0	2008
5.5-5.9	4	1	0	0	0	1	0	0	0	>=7	>=7	0	0	0	1	30.9	38.7891	0	2013
5.5-5.9	4	0	0	0	0	0	0	0	0	>=7	>=7	0	0	0	0	38.6	23.737	0	2013
5.0-5.4	3	1	0	0	0	0	0	0	0	>=7	>=7	0	0	0	0	26.4	26.4381	1	2010
5.0-5.4	3	1	0	0	0	0	0	0	0	>=7	>=7	0	0	0	0	27.6	25.5588	0	2011
5.0-5.4	3	1	1	1	0	0	0	0	0	>=7	>=7	0	0	0	0	29.5	28.1205	1	2008
5.0-5.4	3	0	0	0	0	0	0	0	0	>=7	>=7	0	0	0	0	38.5	30.4867	0	2013
5.0-5.4	3	1	0	0	0	0	0	0	0	>=7	>=7	0	0	0	0	27.2	28.7831	1	2007
5.5-5.9	4	1	0	0	0	0	0	0	0	>=7	>=7	0	1	0	0	29.2	29.0819	0	2009
5.0-5.4	3	1	0	0	0	0	0	0	0	>=7	>=7	0	0	0	0	33.3	25.1904	1	2010
4.5-4.9	2	0	0	0	0	0	0	0	0	>=7	>=7	0	0	0	0	30.5	21.6041	0	2008
5.5-5.9	4	0	0	1	1	0	0	0	0	>=7	>=7	0	0	0	0	29.6	27.8	0	2008
5.0-5.4	3	0	0	0	0	0	0	0	0	>=7	>=7	0	0	0	0	29.4	24.0346	1	2011
5.5-5.9	4	0	0	0	0	0	0	0	0	>=7	>=7	0	0	0	0	27.6	26.1328	1	2006
5.0-5.4	3	1	0	0	0	0	0	0	0	>=7	>=7	0	0	0	0	29.8	28.6078	1	2010
5.0-5.4	3	0	0	0	0	0	0	0	0	>=7	>=7	0	0	0	1	32.4	23.6719	1	2008
6.0-6.4	5	1	0	0	0	0	0	0	0	>=7	>=7	0	0	0	0	24.4	36.2624	0	2006
5.0-5.4	3	0	0	0	0	0	0	0	0	>=7	>=7	0	0	0	0	32.3	26.1719	1	2009
5.0-5.4	3	1	1	1	0	0	0	0	0	>=7	>=7	0	0	0	0	31.6	33.6485	1	2008
5.0-5.4	3	0	0	0	0	0	0	0	0	>=7	>=7	0	0	0	0	33.8	31.7086	0	2011
5.5-5.9	4	0	0	0	0	0	0	0	0	>=7	>=7	0	0	0	0	37	28.2006	1	2008
5.5-5.9	4	0	0	0	0	0	0	0	0	>=7	>=7	1	0	0	0	38.9	25.5167	0	2010
5.5-5.9	4	0	0	0	0	0	0	0	0	>=7	>=7	0	0	0	0	29.7	26.7981	0	2011
4.5-4.9	2	1	0	0	0	0	0	0	0	>=7	>=7	0	0	0	0	29.7	29.1655	0	2012
5.0-5.4	3	1	1	1	0	0	0	0	0	>=7	>=7	0	0	0	0	29.7	30.8248	1	2009
5.5-5.9	4	0	0	0	0	0	0	0	0	>=7	>=7	0	0	0	0	33.8	26.1719	0	2010
5.0-5.4	3	0	0	0	0	0	0	0	0	>=7	>=7	0	0	0	0	27	20.3244	1	2010
5.0-5.4	3	0	0	0	0	0	0	0	0	>=7	>=7	0	0	0	0	27.6	31.8458	0	2006
5.5-5.9	4	0	0	0	0	0	0	0	1	>=7	>=7	1	0	0	0	27.1	28.9062	1	2010
4.5-4.9	2	1	0	0	0	0	0	0	0	>=7	>=7	0	0	0	0	32	26.5557	0	2009
4.5-4.9	2	0	0	0	0	0	0	0	0	>=7	>=7	1	0	0	0	32.9	21.9513	0	2012
5.0-5.4	3	0	0	0	0	0	0	0	0	>=7	>=7	0	0	0	0	34.9	30.1063	0	2010
5.0-5.4	3	0	0	0	0	0	0	0	0	>=7	>=7	0	0	0	0	26.8	22.8928	0	2008
5.0-5.4	3	0	0	0	0	1	0	0	1	>=7	>=7	0	0	0	0	35.1	31.9922	0	2011
5.0-5.4	3	0	0	0	0	0	0	0	1	>=7	>=7	0	0	0	0	27.8	24.7957	1	2013
5.0-5.4	3	0	0	0	0	0	0	0	0	>=7	>=7	0	0	0	0	31.5	21.1226	1	2013
5.5-5.9	4	1	0	0	0	0	0	0	0	>=7	>=7	0	0	0	0	25.2	27.7662	0	2011
5.0-5.4	3	0	0	0	0	1	0	0	0	>=7	>=7	1	0	0	1	27.5	26.9989	1	2010
5.0-5.4	3	0	0	0	0	0	0	0	0	>=7	>=7	0	0	0	0	27.3	35.1562	0	2007
5.5-5.9	4	1	0	0	0	0	0	0	0	>=7	>=7	0	0	0	0	36	26.8352	1	2012
5.0-5.4	3	0	0	0	0	0	0	0	0	>=7	>=7	0	0	0	0	34.1	25.5568	0	2006
5.5-5.9	4	0	0	0	0	0	0	0	0	>=7	>=7	0	0	0	0	24.6	26.7229	1	2010
5.0-5.4	3	0	0	0	0	0	0	0	0	>=7	>=7	0	0	0	0	35.8	27.9709	0	2013
5.0-5.4	3	0	0	0	0	0	0	0	0	>=7	>=7	0	0	0	0	34.5	26.5755	0	2007
5.5-5.9	4	0	0	0	0	0	0	0	0	>=7	>=7	0	0	0	0	28.9	34.0265	1	2012
5.5-5.9	4	0	0	0	0	0	0	0	0	>=7	>=7	0	0	0	0	31.3	25.924	0	2010
5.0-5.4	3	1	1	1	0	0	0	0	0	>=7	>=7	0	0	0	0	38.5	29.9631	1	2011
4.5-4.9	2	1	0	0	0	0	0	0	0	>=7	>=7	0	0	0	0	31.2	20.8325	0	2008
6.0-6.4	5	1	0	0	0	0	0	0	0	>=7	>=7	0	0	0	0	34.6	27.6951	1	2012
5.0-5.4	3	0	0	0	0	0	0	0	0	>=7	>=7	0	0	0	0	32	22.2506	1	2011
6.0-6.4	5	0	0	0	0	0	0	0	0	>=7	>=7	0	1	0	1	20.7	28.9283	1	2006
6.0-6.4	5	1	0	0	0	0	0	0	0	>=7	>=7	0	0	0	0	40.8	24.6094	0	2010
5.5-5.9	4	0	0	0	0	1	0	0	0	>=7	>=7	1	0	0	1	29.4	28.0109	0	2012
5.0-5.4	3	0	0	0	0	0	1	0	0	>=7	>=7	0	0	0	0	28.5	26.25	0	2010
5.0-5.4	3	0	0	0	0	0	0	0	0	>=7	>=7	0	0	0	0	37	30.8428	0	2012
5.0-5.4	3	0	0	0	0	0	0	0	0	>=7	>=7	0	0	0	0	35.3	27.9603	1	2011
4.5-4.9	2	0	0	0	0	0	0	0	0	>=7	>=7	0	0	0	0	27.7	27.3437	0	2006
5.0-5.4	3	1	1	1	0	0	0	0	1	>=7	>=7	0	0	0	0	30.2	25.974	1	2009
5.5-5.9	4	1	0	0	0	0	0	0	0	>=7	>=7	0	0	0	0	34.3	25.974	0	2013
5.5-5.9	4	1	0	0	0	0	0	0	0	>=7	>=7	0	1	0	0	24.5	35.7031	0	2009
5.0-5.4	3	0	0	0	0	1	0	0	0	>=7	>=7	0	0	0	0	36.5	30.064	0	2013
5.5-5.9	4	0	0	0	0	0	0	0	0	>=7	>=7	0	0	0	0	29.2	33.0579	1	2009
6.0-6.4	5	0	0	0	0	0	0	0	0	>=7	>=7	0	0	0	1	30.7	28.7201	0	2008
5.5-5.9	4	0	0	0	0	1	0	0	0	<7	>=7	1	0	0	1	27.2	25.677	0	2009
5.0-5.4	3	0	0	0	0	0	0	0	0	>=7	>=7	0	0	0	0	23.3	31.7636	0	2008
5.0-5.4	3	1	0	0	0	0	0	0	0	>=7	>=7	0	0	0	0	26.7	24.7567	0	2011
5.0-5.4	3	0	0	0	0	0	0	0	0	>=7	>=7	0	0	0	0	30.2	29.5186	1	2012
5.5-5.9	4	0	0	0	0	0	0	0	0	>=7	>=7	0	0	0	0	29.6	28.5536	0	2012
4.5-4.9	2	0	0	1	0	0	0	0	0	>=7	>=7	0	0	0	1	35.1	34.9303	1	2013
5.5-5.9	4	0	0	0	0	1	0	0	1	<7	<7	1	0	1	1	32.4	29.0533	0	2012
6.0-6.4	5	0	0	0	0	0	0	0	0	>=7	>=7	0	0	0	0	32	20.83	0	2009
5.0-5.4	3	1	0	0	0	0	0	0	0	>=7	>=7	0	0	0	0	28.5	28.8754	0	2009
5.0-5.4	3	0	0	0	0	0	0	0	0	>=7	>=7	0	0	0	0	38.7	24.2382	0	2011
5.0-5.4	3	1	0	0	0	1	0	0	0	>=7	>=7	0	0	0	0	24.7	30	1	2006
5.0-5.4	3	0	0	0	0	0	0	0	0	>=7	>=7	0	0	0	0	35.2	27.3646	0	2007
5.5-5.9	4	0	0	0	0	0	0	0	1	>=7	>=7	0	0	0	1	30.5	34.188	1	2013
5.0-5.4	3	1	0	0	0	0	0	0	0	>=7	>=7	0	0	0	0	29.3	25.8876	1	2008
5.5-5.9	4	0	0	0	0	0	0	0	0	>=7	>=7	0	0	0	0	30.7	29.6158	1	2010
5.0-5.4	3	0	0	0	0	0	0	0	0	>=7	>=7	0	0	0	0	31.8	21.6713	0	2007
5.5-5.9	4	1	0	0	0	0	0	0	0	>=7	>=7	0	0	0	0	34	24.4646	0	2009
5.5-5.9	4	1	1	1	0	0	0	0	0	>=7	>=7	0	0	0	0	30.8	27.3399	1	2007
1.<4.5	1	0	0	0	0	0	0	1	0	>=7	>=7	0	0	0	0	33.8	23.3958	1	2011
4.5-4.9	2	0	0	0	0	0	0	0	0	>=7	>=7	0	0	0	0	32.1	23.4755	1	2013
5.5-5.9	4	0	0	0	0	0	0	0	0	>=7	>=7	0	0	0	0	31.5	30.4832	0	2008
4.5-4.9	2	1	0	0	0	0	0	0	0	>=7	>=7	0	0	0	0	32.6	24.2475	0	2009
5.0-5.4	3	0	0	0	0	0	0	0	0	>=7	>=7	0	0	0	0	30.2	28.125	0	2012
5.0-5.4	3	0	0	1	0	0	0	0	0	>=7	>=7	0	0	0	0	27.2	24.5852	0	2008
5.0-5.4	3	0	0	0	0	1	0	0	0	>=7	>=7	1	0	0	1	28.1	22.6257	0	2008
6.0-6.4	5	1	0	0	0	0	0	0	0	>=7	>=7	0	0	0	0	39.2	30.7479	1	2010
5.0-5.4	3	0	0	0	0	0	0	0	0	>=7	>=7	0	0	0	0	29.1	30.3302	1	2008
5.0-5.4	3	0	0	0	0	0	0	0	0	>=7	>=7	0	0	0	0	28.5	28.6048	0	2006
5.0-5.4	3	0	0	0	0	1	0	0	0	>=7	>=7	1	0	0	0	36.2	23.8248	0	2010
4.5-4.9	2	1	0	0	0	0	0	0	0	>=7	>=7	0	0	0	0	37.6	29.3222	0	2012
5.0-5.4	3	0	0	0	0	0	0	0	0	>=7	>=7	0	0	0	0	23.8	25.2305	0	2013
5.0-5.4	3	1	0	0	0	0	0	0	0	>=7	>=7	0	0	0	0	41	32.4467	0	2008
5.0-5.4	3	0	0	0	0	1	0	0	0	>=7	>=7	1	0	0	1	36.6	26.0375	0	2012
5.5-5.9	4	0	0	0	0	0	0	0	0	>=7	>=7	0	0	0	0	30.2	33.5937	0	2011
4.5-4.9	2	1	0	0	0	0	0	0	0	>=7	>=7	0	0	0	0	34.2	27.5482	0	2007
5.5-5.9	4	1	1	0	0	0	0	0	1	>=7	>=7	0	0	0	1	23.8	40.813	1	2008
5.5-5.9	4	0	0	0	0	0	0	0	0	>=7	>=7	0	0	0	0	29.7	26.0375	1	2009
5.0-5.4	3	0	0	0	0	0	0	0	0	>=7	>=7	0	0	0	0	30.1	23.4375	0	2006
5.5-5.9	4	0	0	0	0	0	0	0	0	>=7	>=7	0	0	0	0	31.6	28.251	0	2006
5.0-5.4	3	1	1	1	0	0	0	0	0	>=7	>=7	0	0	0	0	34.8	23.0681	1	2010
5.0-5.4	3	0	0	1	0	1	0	0	0	>=7	>=7	0	0	0	0	27.5	28.1088	0	2011
6.0-6.4	5	1	0	0	0	0	0	0	0	>=7	>=7	0	0	0	0	31.8	40.4444	0	2011
5.0-5.4	3	1	0	0	0	0	0	0	0	>=7	>=7	0	0	0	0	34.7	27.6621	0	2007
5.0-5.4	3	1	0	0	0	0	0	0	0	>=7	>=7	0	0	0	0	34.6	31.5963	0	2011
5.0-5.4	3	0	0	0	0	0	0	0	0	>=7	>=7	0	0	0	0	31.5	29.0625	0	2010
5.0-5.4	3	0	0	0	0	0	0	0	0	>=7	>=7	0	0	0	0	33.3	29.6875	0	2012
5.0-5.4	3	0	0	0	0	0	0	0	0	>=7	>=7	0	0	0	0	28.8	25.9612	1	2007
5.5-5.9	4	0	0	0	0	1	0	0	0	>=7	>=7	1	0	0	1	30.4	28.5671	0	2008
5.5-5.9	4	0	0	0	0	0	0	0	0	>=7	>=7	0	0	0	0	33.4	24.0625	0	2009
5.0-5.4	3	0	0	0	0	0	0	0	0	>=7	>=7	0	0	0	0	29.4	29.8222	1	2012
6.0-6.4	5	1	1	1	0	0	0	0	0	>=7	>=7	0	0	0	0	21.8	26.4792	1	2010
5.0-5.4	3	0	0	1	0	0	0	0	0	>=7	>=7	0	0	0	0	27.5	25.1486	0	2010
4.5-4.9	2	1	0	0	0	0	0	0	0	>=7	>=7	0	0	0	0	32.8	26.4381	0	2010
5.5-5.9	4	0	0	1	0	0	0	0	0	>=7	>=7	0	0	0	0	27.7	32.4219	1	2011
5.0-5.4	3	0	0	0	0	0	0	0	0	>=7	>=7	1	0	0	0	27.6	29.1406	1	2009
5.0-5.4	3	0	0	0	0	0	0	0	0	>=7	>=7	0	0	0	0	29.5	29.375	0	2011
5.5-5.9	4	1	0	0	0	0	0	0	0	>=7	>=7	0	0	0	0	35.2	25.711	1	2008
5.5-5.9	4	1	0	0	0	0	0	0	0	>=7	>=7	0	0	0	0	37.4	25.6369	0	2010
5.0-5.4	3	0	0	0	0	0	0	0	0	>=7	>=7	0	0	0	0	35.7	27.1814	0	2010
5.5-5.9	4	0	0	0	0	0	0	0	0	>=7	>=7	0	0	0	0	28.2	28.441	1	2008
5.0-5.4	3	0	0	0	0	0	0	0	0	>=7	>=7	0	0	0	0	36.1	24.8286	0	2011
5.5-5.9	4	1	0	0	0	0	0	0	1	>=7	>=7	0	0	0	0	29.6	31.2314	1	2011
6.0-6.4	5	0	0	0	0	0	0	0	1	>=7	>=7	0	0	0	0	36	27.4004	1	2012
5.0-5.4	3	0	0	0	0	0	0	0	0	>=7	>=7	0	0	0	0	22.7	25.5102	1	2006
5.5-5.9	4	0	0	0	0	0	0	0	0	>=7	>=7	0	0	0	0	39.2	23.2335	0	2010
5.0-5.4	3	0	0	0	0	0	0	0	0	>=7	>=7	0	0	0	0	31.8	29.5626	1	2008
6.0-6.4	5	0	0	0	0	0	0	0	0	>=7	>=7	0	0	0	0	34.1	32.4467	0	2010
5.5-5.9	4	1	1	0	0	0	0	0	0	>=7	>=7	0	0	0	0	26.9	28.6813	0	2009
5.5-5.9	4	0	0	0	0	0	0	0	0	>=7	>=7	0	0	0	0	31	29.7228	0	2013
5.0-5.4	3	1	1	1	0	0	0	0	0	>=7	>=7	0	0	0	0	35.9	28.2731	1	2013
5.0-5.4	3	0	0	0	0	0	1	0	0	>=7	>=7	0	0	0	0	32.4	24	1	2009
5.0-5.4	3	0	0	0	0	0	0	0	0	>=7	>=7	0	0	0	0	34	31.2386	1	2010
4.5-4.9	2	0	0	0	0	0	0	0	0	>=7	>=7	0	0	0	0	32.1	27.438	0	2008
5.0-5.4	3	0	0	0	0	1	0	0	0	>=7	>=7	1	0	0	1	30.3	25.2994	1	2011
4.5-4.9	2	0	0	0	0	0	0	0	0	>=7	>=7	0	0	0	0	32.7	25.1307	0	2013
5.5-5.9	4	0	0	1	0	0	0	0	0	>=7	>=7	0	0	0	0	30.7	20.9644	0	2008
5.5-5.9	4	0	0	0	0	1	0	0	0	>=7	>=7	1	0	0	1	27.1	26.7759	0	2006
5.5-5.9	4	0	0	0	0	0	0	0	0	>=7	>=7	0	0	0	0	31.7	24.4646	1	2013
5.0-5.4	3	1	0	0	0	0	0	0	0	>=7	>=7	0	0	0	0	34.8	23.4221	1	2013
5.5-5.9	4	0	0	0	0	0	0	0	0	>=7	>=7	0	0	0	0	25.9	28.3987	0	2009
5.0-5.4	3	0	0	0	0	0	0	0	0	>=7	>=7	0	0	0	0	29.5	25.0761	1	2008
5.5-5.9	4	0	0	0	0	0	0	0	0	>=7	>=7	0	0	0	0	24.4	34.8087	0	2012
5.5-5.9	4	1	0	0	0	0	0	0	0	>=7	>=7	1	0	0	0	33.1	25.3333	0	2010
5.0-5.4	3	1	0	0	0	0	0	0	0	>=7	>=7	0	0	0	0	31	29.4118	0	2013
6.0-6.4	5	1	0	0	0	0	0	0	0	>=7	>=7	0	0	0	0	30.6	30.3125	0	2007
5.0-5.4	3	0	0	0	0	0	0	0	0	>=7	>=7	0	0	0	0	29.1	19.9965	0	2013
5.5-5.9	4	1	1	1	0	0	0	0	0	>=7	>=7	0	0	0	0	28.1	24.6035	1	2006
5.5-5.9	4	1	1	1	0	0	0	0	0	>=7	>=7	0	0	0	0	34.3	27.3033	1	2009
4.5-4.9	2	0	0	0	0	1	0	0	1	>=7	>=7	0	0	0	0	33	29.0531	1	2011
5.0-5.4	3	1	0	0	0	0	0	0	0	>=7	>=7	0	0	0	0	32.1	28.5952	0	2010
5.5-5.9	4	0	0	1	0	0	0	0	0	>=7	>=7	0	0	0	0	32.9	30.2222	0	2011
6.0-6.4	5	0	0	0	0	1	0	0	0	>=7	>=7	0	0	0	0	27.8	26.3702	1	2006
5.0-5.4	3	0	0	0	0	0	0	0	0	>=7	>=7	0	0	0	0	33.5	23.9188	0	2011
5.0-5.4	3	0	0	1	0	0	0	0	0	>=7	>=7	0	0	0	0	38.8	28.3039	0	2011
5.5-5.9	4	0	0	0	0	0	0	0	0	>=7	>=7	0	0	0	0	32.1	26.0776	1	2011
6.5-6.9	6	1	0	0	0	0	0	0	0	>=7	>=7	0	0	0	1	31.9	28.6818	0	2009
5.0-5.4	3	0	0	0	0	0	0	0	0	>=7	>=7	0	0	0	0	27.9	25.3165	0	2013
5.0-5.4	3	1	1	1	0	0	0	0	0	>=7	>=7	0	0	0	0	32.6	30.2608	1	2013
5.5-5.9	4	1	1	1	0	0	0	0	0	>=7	>=7	0	0	0	0	29.2	33.4882	1	2007
5.5-5.9	4	1	0	0	0	0	0	0	0	>=7	>=7	0	0	0	0	30.6	32.9687	0	2008
5.5-5.9	4	1	0	0	0	0	0	0	0	>=7	>=7	0	0	0	0	34.2	39.8493	0	2013
5.0-5.4	3	0	0	0	0	0	0	0	0	>=7	>=7	0	0	0	0	33.7	25.3906	1	2006
4.5-4.9	2	1	1	1	0	0	0	0	0	>=7	>=7	0	0	0	0	27.8	27.8876	1	2011
4.5-4.9	2	0	0	0	0	0	0	0	0	>=7	>=7	0	0	0	0	27	29.413	0	2009
5.5-5.9	4	1	0	0	0	0	0	0	0	>=7	>=7	0	0	0	0	31	24.5153	0	2009
5.0-5.4	3	0	0	0	0	0	0	0	0	>=7	>=7	0	0	0	0	32.7	24.974	0	2009
5.5-5.9	4	0	0	0	0	0	0	0	0	>=7	>=7	0	0	0	0	40.5	28.0778	0	2008
5.0-5.4	3	0	0	0	0	0	0	0	0	>=7	>=7	0	0	0	0	29.6	24.7281	1	2013
5.5-5.9	4	0	0	0	0	0	0	0	0	>=7	>=7	0	0	0	0	31.6	23.0469	0	2009
5.5-5.9	4	0	0	0	0	0	0	1	1	>=7	>=7	0	0	0	0	35.7	29.5626	1	2013
5.5-5.9	4	0	0	0	0	0	0	0	0	>=7	>=7	0	0	0	1	38.3	29.2421	1	2008
5.5-5.9	4	1	0	0	0	0	0	0	0	>=7	>=7	0	0	0	0	30.2	33.2479	0	2012
5.0-5.4	3	0	0	0	0	0	0	0	0	>=7	>=7	0	0	0	0	27.7	23.1291	1	2012
1.<4.5	1	0	0	0	0	0	0	0	0	>=7	>=7	0	0	0	0	27.8	31.6456	0	2013
4.5-4.9	2	0	0	0	0	0	0	0	0	>=7	>=7	1	0	0	1	29.7	20.9902	1	2007
5.5-5.9	4	0	0	0	0	1	0	0	0	>=7	>=7	0	0	0	0	26.9	26.4024	0	2012
5.0-5.4	3	0	0	0	0	0	0	1	0	>=7	>=7	0	0	0	0	27.9	25.2826	1	2010
5.0-5.4	3	0	0	0	0	0	0	0	0	>=7	>=7	0	0	0	0	33.8	26.9531	0	2009
6.0-6.4	5	0	0	0	0	0	0	0	0	>=7	>=7	0	0	0	0	24.5	29.8592	1	2011
6.0-6.4	5	0	0	0	0	0	0	0	0	>=7	>=7	0	0	0	0	31.6	25.3569	0	2008
5.5-5.9	4	0	0	0	0	0	0	0	0	>=7	>=7	0	0	0	0	31.5	27.2159	0	2007
5.5-5.9	4	0	0	0	0	0	1	0	0	>=7	>=7	0	0	0	0	31.4	30.0793	1	2009
6.0-6.4	5	0	0	0	0	0	0	0	0	>=7	>=7	0	0	0	0	31.9	34.8944	1	2009
5.5-5.9	4	0	0	0	0	0	0	0	0	>=7	>=7	0	0	0	0	30.8	26.0937	0	2009
5.5-5.9	4	1	0	0	0	0	0	0	1	>=7	>=7	0	1	0	0	31	35.4979	0	2013
5.5-5.9	4	0	0	0	0	0	0	0	0	>=7	>=7	0	0	0	1	34.7	28.4766	1	2009
5.0-5.4	3	1	0	0	0	0	0	0	0	>=7	>=7	0	0	0	0	28.5	33.6889	0	2011
4.5-4.9	2	0	0	0	0	1	0	0	0	>=7	>=7	1	0	0	1	33.7	35.371	0	2011
6.0-6.4	5	0	0	0	0	0	0	0	0	>=7	>=7	0	0	0	0	34	27.5546	0	2007
5.0-5.4	3	0	0	0	0	0	0	0	0	>=7	>=7	0	0	0	0	28.2	25.7031	0	2012
5.5-5.9	4	0	0	1	0	0	0	0	0	>=7	>=7	0	0	0	0	30	27.2392	0	2008
6.0-6.4	5	1	0	0	0	0	0	0	0	>=7	>=7	0	0	0	0	30.2	25.6821	0	2007
5.5-5.9	4	0	0	0	0	0	0	0	0	>=7	>=7	0	0	0	0	26	37.223	0	2008
5.0-5.4	3	0	0	0	0	0	0	0	0	>=7	>=7	0	0	0	0	27.2	25.7812	0	2012
5.0-5.4	3	0	0	1	0	0	0	0	0	>=7	>=7	0	0	0	0	25.8	21.9355	0	2009
5.0-5.4	3	0	0	0	0	0	0	0	0	>=7	>=7	0	0	0	0	31.3	27.5482	1	2008
5.0-5.4	3	0	0	1	0	0	0	0	0	>=7	>=7	0	0	0	1	32.8	25.625	0	2007
5.5-5.9	4	1	0	0	0	0	0	0	0	>=7	>=7	0	0	0	0	25.9	28.75	0	2009
5.5-5.9	4	1	0	0	0	0	0	0	0	>=7	>=7	0	0	0	0	30.2	24.287	0	2012
5.5-5.9	4	1	1	1	0	0	0	0	0	>=7	>=7	0	0	0	0	28.7	26.986	1	2008
5.0-5.4	3	1	0	0	0	0	0	0	0	>=7	>=7	0	0	0	0	32.8	30.3302	0	2013
5.5-5.9	4	1	0	0	0	0	0	0	0	>=7	>=7	0	0	0	0	35	31.875	0	2009
4.5-4.9	2	0	0	0	0	0	0	1	0	>=7	>=7	0	0	0	0	29.7	23.7141	0	2013
5.0-5.4	3	0	0	0	0	0	0	0	0	>=7	>=7	0	0	0	0	37.2	26.749	1	2011
5.0-5.4	3	0	0	0	0	0	0	0	0	>=7	>=7	0	0	0	0	26.6	25.8692	1	2008
5.0-5.4	3	0	0	1	0	0	0	0	0	>=7	>=7	0	0	0	0	22.9	25.2237	0	2007
5.5-5.9	4	0	0	0	0	0	0	0	0	>=7	>=7	0	0	0	0	26	36.6285	1	2012
5.0-5.4	3	0	0	0	0	0	0	0	0	>=7	>=7	0	0	0	0	26.2	27.7422	0	2007
5.5-5.9	4	1	0	0	0	0	0	0	0	<7	<7	0	0	0	1	36.6	28.9062	0	2012
4.5-4.9	2	0	0	0	0	0	0	0	0	>=7	>=7	0	0	0	0	33.2	24.0346	1	2012
4.5-4.9	2	0	0	0	0	0	0	0	0	>=7	>=7	0	0	0	0	35.5	26.9531	1	2009
5.0-5.4	3	0	0	0	0	0	0	0	0	>=7	>=7	0	0	0	0	32.1	25.9574	0	2008
4.5-4.9	2	0	0	0	0	0	0	0	0	>=7	>=7	0	0	0	0	31	25.1162	1	2012
6.5-6.9	6	0	0	0	0	0	0	0	0	>=7	>=7	0	0	0	0	30	25.3966	1	2006
4.5-4.9	2	1	0	0	0	0	0	0	0	>=7	>=7	0	0	0	0	38.1	24.8358	0	2007
5.0-5.4	3	0	0	0	0	0	0	0	0	>=7	>=7	0	0	0	0	31.7	26.3147	0	2013
5.0-5.4	3	0	0	0	0	0	0	0	0	>=7	>=7	0	0	0	0	35.4	26.0156	1	2009
5.0-5.4	3	1	0	0	0	0	0	0	0	>=7	>=7	0	0	0	0	28	27.4943	0	2007
5.0-5.4	3	1	0	0	0	0	0	0	0	>=7	>=7	0	0	0	0	41.7	28.6215	1	2012
5.5-5.9	4	0	0	0	0	0	0	0	0	>=7	>=7	0	0	0	0	26.3	24.7221	0	2008
4.5-4.9	2	0	0	0	0	0	0	0	0	>=7	>=7	0	0	0	0	24.3	28.764	0	2006
4.5-4.9	2	0	0	0	0	0	0	0	0	>=7	>=7	0	0	0	0	29.3	22.9936	0	2006
5.0-5.4	3	0	0	0	0	0	0	0	0	>=7	>=7	0	0	0	0	26	29.7778	0	2007
5.5-5.9	4	1	0	0	0	0	0	0	0	>=7	>=7	0	0	0	0	34.5	26.713	0	2007
6.0-6.4	5	0	0	0	0	0	0	0	0	>=7	>=7	0	1	0	0	24.7	29.0625	0	2007
5.5-5.9	4	0	0	0	0	0	0	0	0	>=7	>=7	0	0	0	0	27.5	30.2836	0	2009
5.0-5.4	3	0	0	0	0	0	0	0	0	>=7	>=7	0	0	0	0	21.4	22.9158	1	2008
5.0-5.4	3	1	0	0	0	0	0	0	0	>=7	>=7	0	0	0	0	34.5	23.3026	1	2011
5.0-5.4	3	1	0	0	0	0	0	0	0	>=7	>=7	0	0	0	0	28	30.3461	0	2007
6.0-6.4	5	0	0	1	0	0	0	0	0	>=7	>=7	0	0	0	0	31.6	24.6094	0	2011
5.5-5.9	4	0	0	1	0	0	0	0	0	>=7	>=7	0	0	0	0	33.6	34.5297	0	2010
5.0-5.4	3	1	0	0	0	0	0	0	0	>=7	>=7	0	0	0	0	28.5	23.9545	1	2007
5.0-5.4	3	1	0	0	0	0	0	0	0	>=7	>=7	0	0	0	0	30.5	25.3162	0	2009
5.5-5.9	4	1	0	0	0	0	0	0	0	>=7	>=7	0	0	0	0	29.7	32.4619	0	2013
4.5-4.9	2	1	0	0	0	0	0	0	0	>=7	>=7	0	0	0	0	23.8	26.3465	1	2013
5.5-5.9	4	0	0	0	0	0	0	0	0	>=7	>=7	0	0	0	0	32.6	22.6562	0	2012
5.5-5.9	4	0	0	0	0	0	0	0	0	>=7	>=7	0	0	0	0	28.1	23.2031	0	2013
5.5-5.9	4	1	0	0	0	1	0	0	1	>=7	>=7	1	0	0	1	32.3	28.9783	0	2012
5.0-5.4	3	0	0	0	0	0	0	0	0	>=7	>=7	0	1	0	1	27.2	29.3947	0	2013
5.5-5.9	4	1	0	0	0	0	0	0	0	>=7	>=7	0	0	0	0	38.2	28.1337	0	2007
>=7	7	0	0	0	0	0	0	0	1	>=7	>=7	0	1	0	0	28	31.8416	0	2010
5.0-5.4	3	0	0	0	0	0	0	0	0	>=7	>=7	0	0	0	0	28.8	31.7809	1	2012
5.0-5.4	3	0	0	0	0	0	0	0	0	>=7	>=7	0	0	0	0	28.2	21.9052	1	2013
5.0-5.4	3	0	0	0	0	0	1	0	0	>=7	>=7	0	0	0	0	28.8	28.6719	1	2010
6.0-6.4	5	1	1	1	0	0	0	0	0	>=7	>=7	0	0	0	0	34.3	29.1782	1	2007
5.5-5.9	4	0	0	0	0	0	0	0	0	>=7	>=7	0	0	0	0	30.2	27.0282	0	2007
5.0-5.4	3	1	1	1	0	0	0	0	0	>=7	>=7	0	0	0	0	26.5	30.0459	1	2011
5.0-5.4	3	0	0	0	0	0	0	0	0	>=7	>=7	0	0	0	0	32.5	21.9916	0	2009
4.5-4.9	2	0	0	0	0	0	0	0	0	>=7	>=7	0	0	0	0	23.7	28.3966	1	2011
4.5-4.9	2	0	0	0	0	0	0	0	0	>=7	>=7	0	0	0	0	24.2	23.833	0	2006
5.0-5.4	3	1	0	0	0	0	0	0	0	>=7	>=7	0	0	0	0	30.5	22.9931	1	2009
5.0-5.4	3	0	0	0	0	0	0	0	0	>=7	>=7	0	0	0	0	29.2	23.9224	1	2010
6.0-6.4	5	1	1	1	0	0	0	0	0	>=7	>=7	0	1	0	1	38	29.9497	1	2008
5.5-5.9	4	0	0	0	0	0	0	0	0	>=7	>=7	0	0	0	1	40.2	24.275	0	2013
4.5-4.9	2	0	0	0	0	0	0	0	0	>=7	>=7	0	0	0	0	35.2	21.4844	1	2011
5.0-5.4	3	0	0	0	0	0	0	0	0	>=7	>=7	0	0	0	0	29.3	22.8175	0	2007
5.0-5.4	3	0	0	0	0	0	0	0	0	>=7	>=7	0	0	0	0	33.6	28.9283	1	2013
5.5-5.9	4	0	0	0	1	0	0	0	0	>=7	>=7	0	0	0	0	27.6	31.2452	1	2013
5.5-5.9	4	0	0	1	0	0	0	0	0	>=7	>=7	0	0	0	0	35.5	24.5243	0	2009
5.5-5.9	4	0	0	0	0	0	0	0	0	>=7	>=7	0	0	0	0	27.9	27.9136	1	2013
5.5-5.9	4	0	0	0	0	0	0	0	0	>=7	>=7	0	0	0	0	30	28.0404	0	2008
5.0-5.4	3	1	0	0	0	0	0	0	0	>=7	>=7	0	0	0	0	28.9	25.5894	0	2009
6.0-6.4	5	0	0	1	1	0	0	0	0	>=7	>=7	0	0	0	0	39.7	30.3637	1	2009
5.0-5.4	3	1	0	0	0	0	0	0	0	>=7	>=7	0	0	0	0	30.8	22.8571	0	2012
5.0-5.4	3	1	0	0	0	0	0	0	0	>=7	>=7	0	0	0	0	36.3	25.0173	1	2013
5.5-5.9	4	0	0	0	0	0	0	0	0	>=7	>=7	0	0	0	0	37.4	23.6719	0	2012
5.5-5.9	4	0	0	0	0	0	0	0	0	>=7	>=7	1	0	0	0	27.3	27.3437	1	2009
5.0-5.4	3	0	0	0	0	0	0	0	0	>=7	>=7	0	0	0	0	31.8	27.4714	1	2011
5.0-5.4	3	0	0	0	0	0	0	0	0	>=7	>=7	0	0	0	0	32.3	24.0346	1	2008
5.0-5.4	3	0	0	0	0	1	0	0	0	>=7	>=7	1	0	0	1	37.2	25.1562	0	2012
5.5-5.9	4	0	0	0	0	0	0	0	0	>=7	>=7	0	0	0	0	30.3	21.83	0	2008
6.0-6.4	5	1	0	0	0	0	0	0	0	>=7	>=7	0	0	0	1	38.9	23.6756	0	2009
5.5-5.9	4	0	0	0	0	0	0	0	0	>=7	>=7	0	0	0	0	25.2	25.2301	0	2012
5.0-5.4	3	0	0	0	0	0	0	0	0	>=7	>=7	0	0	0	0	33.5	31.2394	0	2013
5.0-5.4	3	1	0	0	0	0	0	0	0	>=7	>=7	0	0	0	0	27.1	27.7344	0	2009
5.0-5.4	3	0	0	0	0	0	1	0	0	>=7	>=7	0	0	0	0	29.2	29.5833	1	2012
5.0-5.4	3	0	0	0	0	0	0	0	0	>=7	>=7	0	0	0	0	26.2	29.0006	1	2010
4.5-4.9	2	1	0	0	0	0	0	0	0	>=7	>=7	0	0	0	0	33.1	34.2976	0	2009
5.5-5.9	4	0	0	0	0	0	0	0	0	>=7	>=7	0	0	0	0	24.4	31.8694	0	2013
5.5-5.9	4	0	0	0	0	0	0	0	0	>=7	>=7	0	0	0	0	32	22.806	1	2009
5.0-5.4	3	0	0	0	0	0	0	0	0	>=7	>=7	0	0	0	0	35.1	28.8754	1	2008
6.0-6.4	5	0	0	0	0	0	0	0	0	>=7	>=7	0	0	0	0	37.8	33.7477	1	2008
5.0-5.4	3	0	0	0	0	0	0	0	1	>=7	>=7	0	0	0	0	26.8	29.4108	1	2012
5.0-5.4	3	0	0	0	0	0	0	0	0	>=7	>=7	0	0	0	0	31.5	27.0312	1	2011
4.5-4.9	2	0	0	0	0	0	0	0	0	>=7	>=7	0	0	0	0	31.6	24.5703	1	2012
5.0-5.4	3	0	0	1	0	0	0	0	0	>=7	>=7	0	0	0	0	32.9	29.1363	0	2007
4.5-4.9	2	1	1	1	0	0	0	0	0	>=7	>=7	0	0	0	0	22	28.7963	1	2006
5.0-5.4	3	1	0	0	0	0	0	0	0	>=7	>=7	0	0	0	0	23.2	27.9261	0	2007
5.0-5.4	3	0	0	0	0	0	0	0	0	>=7	>=7	0	0	0	0	28.2	28.9062	0	2011
4.5-4.9	2	1	1	1	0	0	0	0	0	>=7	>=7	0	0	0	0	30.9	23.3984	1	2009
5.0-5.4	3	1	0	0	0	1	0	0	0	<7	<7	1	0	0	1	29.4	25.4687	0	2012
5.0-5.4	3	1	0	0	0	1	0	0	0	>=7	>=7	0	0	0	0	30.4	27.268	0	2008
5.5-5.9	4	0	0	0	0	0	0	0	0	>=7	>=7	0	0	0	0	30.9	27.7199	0	2011
5.0-5.4	3	0	0	0	0	0	0	0	0	>=7	>=7	0	0	0	0	27.6	25.3125	1	2011
5.0-5.4	3	0	0	0	0	0	0	0	0	>=7	>=7	0	0	0	0	23.7	29.5513	1	2011
5.0-5.4	3	0	0	0	0	0	0	0	0	>=7	>=7	0	0	0	0	34.5	25.2363	0	2011
5.0-5.4	3	0	0	0	0	0	0	0	0	>=7	>=7	0	0	0	0	34	22.9421	1	2011
5.0-5.4	3	1	1	1	0	0	0	0	1	>=7	>=7	0	0	0	0	33.9	31.0213	0	2010
>=7	7	0	0	0	0	0	0	0	0	>=7	>=7	0	1	0	0	36.5	32.9425	0	2013
5.0-5.4	3	1	0	0	0	0	0	0	0	>=7	>=7	0	0	0	0	29.1	26.1066	0	2006
5.0-5.4	3	0	0	0	0	0	0	0	0	>=7	>=7	0	0	0	0	31.9	30.2978	0	2010
4.5-4.9	2	0	0	0	0	0	0	0	0	>=7	>=7	0	0	0	0	26.7	33.4224	0	2013
6.0-6.4	5	1	0	0	0	0	0	0	1	>=7	>=7	0	0	0	0	30.4	26.9185	0	2008
5.0-5.4	3	0	0	0	0	0	1	0	0	>=7	>=7	0	0	0	0	30.5	25.2889	1	2009
5.0-5.4	3	0	0	0	0	0	0	0	0	>=7	>=7	0	0	0	0	23.7	26.2188	1	2009
5.0-5.4	3	0	0	0	0	0	0	0	0	>=7	>=7	0	0	0	0	25.7	25.3685	0	2011
5.0-5.4	3	1	0	1	0	0	0	0	0	>=7	>=7	0	0	0	0	35.3	22.8838	0	2009
5.5-5.9	4	1	0	0	0	0	0	0	0	>=7	>=7	0	0	0	0	29.9	29.5988	0	2012
5.5-5.9	4	0	0	0	0	0	0	0	0	>=7	>=7	0	0	0	0	23.1	33.59	0	2007
5.0-5.4	3	0	0	0	0	1	0	0	0	>=7	>=7	0	0	0	0	31.2	23.9501	1	2008
5.0-5.4	3	1	0	0	0	0	0	0	0	>=7	>=7	0	0	0	0	31.1	22.231	1	2011
5.0-5.4	3	0	0	1	0	0	0	0	0	>=7	>=7	0	0	0	0	30.6	20.3125	0	2009
5.5-5.9	4	1	1	1	0	0	0	0	0	>=7	>=7	0	0	0	0	30.9	31.2883	1	2008
5.5-5.9	4	0	0	0	0	0	0	0	0	>=7	>=7	0	0	0	0	31	37.892	1	2013
5.5-5.9	4	0	0	0	0	0	0	0	0	>=7	>=7	1	0	0	1	35.9	31.1342	0	2013
5.5-5.9	4	0	0	1	0	0	0	0	0	>=7	>=7	0	0	0	0	27.6	31.6406	0	2009
5.0-5.4	3	0	0	0	0	0	0	0	0	>=7	>=7	0	0	0	0	31.8	23.9062	0	2006
5.0-5.4	3	0	0	0	0	0	0	0	0	>=7	>=7	0	0	0	0	23.7	26.2227	1	2008
5.0-5.4	3	1	1	1	0	0	0	0	0	>=7	>=7	0	0	0	0	26.2	26.6193	1	2013
4.5-4.9	2	1	0	0	0	0	0	0	1	>=7	>=7	1	0	0	1	34.2	26.5603	0	2012
5.0-5.4	3	1	0	0	0	0	0	0	0	>=7	>=7	0	0	0	0	35.1	27.8307	1	2011
4.5-4.9	2	0	0	1	0	0	0	0	0	>=7	>=7	0	0	0	1	27.9	22.71	0	2010
5.5-5.9	4	0	0	0	0	0	0	0	0	>=7	>=7	0	0	0	0	28.4	36.6285	0	2012
4.5-4.9	2	0	0	0	0	0	0	0	0	>=7	>=7	0	0	0	0	37.7	22.1893	1	2013
5.5-5.9	4	0	0	0	0	0	1	0	0	>=7	>=7	0	0	0	0	32.8	24.8889	1	2011
5.0-5.4	3	1	0	0	0	0	0	0	0	<7	>=7	0	0	0	1	39.2	23.0148	0	2013
5.0-5.4	3	0	0	0	0	0	0	0	0	>=7	>=7	0	0	0	0	32.9	24.287	0	2007
5.0-5.4	3	0	0	0	0	0	0	0	0	>=7	>=7	0	0	0	0	29.9	24.6152	0	2013
5.0-5.4	3	0	0	0	0	0	0	0	0	>=7	>=7	0	0	0	0	31.5	27.6361	1	2013
5.0-5.4	3	1	0	0	0	0	0	0	0	>=7	>=7	0	0	0	0	30.3	28.0889	1	2012
5.0-5.4	3	0	0	0	0	0	0	0	0	>=7	>=7	0	0	0	0	35	23.2335	0	2006
5.5-5.9	4	0	0	0	0	0	0	0	0	>=7	>=7	0	0	0	1	33.1	30.1562	0	2013
5.5-5.9	4	1	0	0	0	0	0	0	0	>=7	>=7	0	0	0	0	27.7	29.3848	0	2006
5.0-5.4	3	0	0	0	0	0	0	0	0	>=7	>=7	0	0	0	0	21.8	22.5182	0	2009
5.5-5.9	4	0	0	0	0	0	0	0	0	>=7	>=7	0	0	0	0	37	28.0889	0	2008
5.5-5.9	4	0	0	0	0	0	1	0	0	>=7	>=7	0	0	0	0	35	25.2363	1	2011
5.0-5.4	3	0	0	0	0	0	1	0	0	>=7	>=7	0	0	0	0	28.3	32.8824	0	2008
5.0-5.4	3	1	0	0	0	0	0	0	0	>=7	>=7	0	0	0	0	26	25.0995	0	2011
5.0-5.4	3	0	0	0	0	0	0	0	0	>=7	>=7	0	0	0	0	32.5	24.8222	0	2009
6.0-6.4	5	1	0	0	0	1	0	0	0	>=7	>=7	0	0	0	0	38.7	32.0294	0	2009
4.5-4.9	2	1	0	0	0	0	0	0	0	>=7	>=7	0	0	0	0	36.2	25.7812	0	2007
5.0-5.4	3	1	0	1	0	0	0	0	0	>=7	>=7	0	0	0	0	35.4	27.2545	0	2011
5.5-5.9	4	0	0	0	0	0	0	0	0	>=7	>=7	0	0	0	0	33.3	24.3661	0	2009
5.0-5.4	3	0	0	1	0	0	0	0	0	>=7	>=7	0	0	0	1	28.9	31.6444	0	2006
5.5-5.9	4	1	0	0	0	0	0	0	0	>=7	>=7	0	0	0	0	31.3	27.3278	0	2011
6.0-6.4	5	1	1	1	0	0	0	0	0	>=7	>=7	0	0	0	0	26.4	32.8473	1	2009
6.5-6.9	6	1	0	0	0	0	0	0	1	>=7	>=7	0	0	0	0	30.6	35.3386	0	2013
5.5-5.9	4	1	1	1	0	0	0	0	0	>=7	>=7	0	0	0	0	36.7	26.8352	1	2009
5.5-5.9	4	0	0	0	0	0	0	0	0	>=7	>=7	1	0	0	0	26.9	25.3123	1	2008
5.5-5.9	4	0	0	0	0	0	0	0	0	>=7	>=7	1	0	0	0	25.6	31.9311	1	2007
6.0-6.4	5	0	0	0	0	1	0	0	0	>=7	>=7	0	0	0	0	27.5	31.6263	0	2008
5.5-5.9	4	1	0	0	0	0	0	0	0	>=7	>=7	0	0	0	0	30.8	31.2452	0	2012
6.0-6.4	5	0	0	0	0	0	0	0	0	>=7	>=7	0	0	0	0	24.6	29.903	0	2009
5.5-5.9	4	1	1	1	0	0	0	0	0	>=7	>=7	0	0	0	0	34.3	26.4573	1	2012
5.0-5.4	3	0	0	0	0	0	0	0	0	>=7	>=7	1	0	0	0	39.6	22.6726	1	2007
5.5-5.9	4	0	0	0	0	0	0	0	0	>=7	>=7	0	0	0	0	26.6	26.7092	0	2011
4.5-4.9	2	1	0	0	0	0	0	0	1	>=7	>=7	0	0	0	1	28	33.3594	1	2008
5.5-5.9	4	1	0	0	0	0	0	0	1	>=7	>=7	0	0	0	0	30.1	35.8116	0	2011
5.5-5.9	4	0	0	0	0	0	0	0	0	>=7	>=7	0	0	0	0	31.9	23.9441	1	2011
5.0-5.4	3	1	0	0	0	0	0	0	0	>=7	>=7	0	0	0	0	39.1	28.6048	0	2012
4.5-4.9	2	0	0	0	0	0	0	0	0	>=7	>=7	0	0	0	0	39.6	28.9073	0	2009
5.5-5.9	4	1	0	0	0	1	0	0	0	>=7	>=7	0	0	0	0	38.1	25.641	1	2012
5.0-5.4	3	0	0	0	0	0	0	0	0	>=7	>=7	0	0	0	0	33.3	28.3987	1	2012
5.0-5.4	3	0	0	0	0	0	0	0	0	>=7	>=7	0	0	0	0	29.9	20.881	0	2006
5.5-5.9	4	0	0	0	0	0	0	0	0	>=7	>=7	0	0	0	0	34.9	27.5277	1	2008
5.0-5.4	3	0	0	0	0	0	0	1	0	>=7	>=7	0	0	0	0	23.7	27.8159	1	2008
5.5-5.9	4	0	0	0	0	0	0	0	0	<7	>=7	0	0	0	0	22.5	29.032	1	2008
5.0-5.4	3	0	0	0	0	0	0	0	0	>=7	>=7	0	0	0	1	26.9	36.6841	1	2012
>=7	7	1	0	0	0	0	0	0	1	>=7	>=7	0	0	0	0	34	37.2536	1	2007
5.5-5.9	4	0	0	0	0	0	0	0	0	>=7	>=7	0	0	0	0	23.4	26.6991	1	2010
5.5-5.9	4	0	0	0	0	1	0	0	0	>=7	>=7	0	0	0	0	27	26.0375	1	2011
5.5-5.9	4	0	0	0	0	0	0	0	0	>=7	>=7	0	0	0	0	32.7	27.1816	1	2010
5.0-5.4	3	0	0	1	0	0	0	0	0	>=7	>=7	0	0	0	0	30	25.0762	1	2011
5.5-5.9	4	1	0	0	0	0	0	0	0	>=7	>=7	0	0	0	0	35.5	34.7656	1	2010
5.5-5.9	4	0	0	0	0	0	1	0	0	>=7	>=7	0	0	0	0	29.4	26.2985	0	2009
5.0-5.4	3	0	0	0	0	0	0	0	0	>=7	>=7	0	0	0	0	23.9	23.8751	0	2012
5.0-5.4	3	1	0	0	0	0	0	0	0	>=7	>=7	0	0	0	0	33.2	24.4001	0	2008
5.0-5.4	3	0	0	0	0	0	1	0	0	>=7	>=7	0	0	0	0	26.9	21.9531	1	2013
5.0-5.4	3	1	1	1	0	0	0	0	0	>=7	>=7	0	0	0	0	33.3	27.9683	1	2008
5.0-5.4	3	1	0	0	0	0	0	0	0	>=7	>=7	0	0	0	0	35.5	27.9683	0	2010
5.0-5.4	3	0	0	1	0	0	0	0	0	>=7	>=7	0	0	0	0	38.4	21.2306	0	2008
5.0-5.4	3	0	0	0	0	0	0	0	0	>=7	>=7	0	0	0	0	27.1	30.7011	1	2013
5.0-5.4	3	1	0	0	0	0	0	0	0	>=7	>=7	0	0	0	0	34.7	25.0464	1	2013
5.5-5.9	4	0	0	0	0	1	0	0	0	>=7	>=7	1	0	0	1	33.2	21.875	1	2013
5.5-5.9	4	1	0	0	0	0	0	0	1	>=7	>=7	0	0	0	0	38.4	39.8864	0	2010
4.5-4.9	2	1	0	0	0	0	0	0	0	>=7	>=7	0	0	0	0	38.5	28.6368	0	2011
4.5-4.9	2	0	0	0	0	0	0	0	0	>=7	>=7	0	0	0	0	33.5	29.34	0	2010
5.0-5.4	3	0	0	0	0	0	0	0	0	>=7	>=7	0	0	0	0	32.8	21.6413	0	2008
5.5-5.9	4	0	0	0	0	0	0	1	1	>=7	>=7	0	0	0	0	38.2	34.2173	0	2008
6.0-6.4	5	1	0	0	0	0	0	0	0	>=7	>=7	0	0	0	0	40.5	33.7925	0	2012
5.5-5.9	4	1	0	0	0	0	0	0	0	>=7	>=7	0	0	0	0	38.4	30.9642	1	2010
5.0-5.4	3	0	0	0	0	0	0	0	0	>=7	>=7	0	0	0	0	29.8	26.6667	1	2011
5.0-5.4	3	0	0	0	0	0	0	0	0	>=7	>=7	0	0	0	1	35.5	29.9631	1	2008
5.5-5.9	4	0	0	0	0	0	0	0	0	>=7	>=7	0	0	0	0	30.5	23.8281	1	2008
5.0-5.4	3	0	0	0	0	0	0	0	0	>=7	>=7	0	0	0	1	31.7	23.3203	0	2009
5.0-5.4	3	0	0	0	0	0	0	0	0	>=7	>=7	0	0	0	0	34.1	28.6215	1	2011
5.0-5.4	3	0	0	0	0	0	0	0	0	>=7	>=7	0	0	0	0	25.9	28.764	0	2013
5.0-5.4	3	1	0	0	0	0	0	0	0	>=7	>=7	0	0	0	0	27.5	24.375	0	2007
5.0-5.4	3	0	0	0	0	0	0	0	0	>=7	>=7	0	0	0	0	31.9	26.9338	0	2007
5.0-5.4	3	1	0	0	0	0	0	0	0	>=7	>=7	0	0	0	0	37.8	25.8478	0	2013
5.0-5.4	3	0	0	0	0	0	0	0	0	>=7	>=7	0	0	0	0	27.1	26.986	1	2009
6.0-6.4	5	0	0	0	0	0	0	0	0	>=7	>=7	0	0	0	0	28.8	24.9112	0	2013
6.0-6.4	5	0	0	1	0	1	0	0	0	>=7	>=7	1	0	0	0	30.1	28.4079	0	2009
5.0-5.4	3	0	0	0	0	0	0	0	0	>=7	>=7	0	0	0	0	33.2	25.7812	1	2013
5.5-5.9	4	1	0	0	0	1	0	0	0	>=7	>=7	1	0	0	1	36.7	22.4323	1	2011
5.0-5.4	3	0	0	1	0	0	0	0	0	>=7	>=7	0	0	0	0	28.2	24.7676	0	2010
5.0-5.4	3	0	0	0	0	0	0	0	0	>=7	>=7	0	0	0	0	24.7	28.0404	1	2010
5.5-5.9	4	1	0	0	0	0	0	0	0	>=7	>=7	0	0	0	0	26.7	33.0579	0	2006
5.5-5.9	4	1	0	0	0	0	0	0	0	>=7	>=7	0	0	0	0	33.6	35.756	0	2013
5.0-5.4	3	0	0	0	0	0	0	0	0	>=7	>=7	0	0	0	0	35	25.4366	0	2009
6.0-6.4	5	1	0	0	0	0	0	0	0	>=7	>=7	0	0	0	1	32.5	26.3574	0	2009
5.5-5.9	4	1	0	0	0	1	0	0	0	>=7	>=7	1	0	0	1	33.8	29.8855	0	2006
5.5-5.9	4	0	0	0	0	1	1	0	0	>=7	>=7	1	0	0	0	34.5	30.8642	1	2009
4.5-4.9	2	0	0	0	0	0	0	0	0	>=7	>=7	0	0	0	0	30.7	26.0262	1	2007
5.0-5.4	3	0	0	0	0	1	0	0	0	>=7	>=7	1	0	0	1	30.3	25.8667	1	2012
5.0-5.4	3	0	0	0	0	0	0	0	0	>=7	>=7	0	0	0	0	17.6	22.9344	1	2012
5.5-5.9	4	0	0	0	0	0	0	0	0	>=7	>=7	0	0	0	0	27.8	22.9761	1	2010
5.5-5.9	4	0	0	0	0	0	0	0	0	>=7	>=7	0	0	0	0	30	25.5567	0	2012
5.5-5.9	4	1	1	1	0	0	0	0	0	>=7	>=7	0	0	0	0	33.8	26.9531	1	2010
5.5-5.9	4	1	0	0	0	0	0	0	0	>=7	>=7	0	0	0	0	29.1	32.2266	1	2012
4.5-4.9	2	1	0	0	0	0	0	0	0	>=7	>=7	0	0	0	0	29.4	30.3254	0	2012
5.5-5.9	4	1	0	0	0	0	0	0	0	>=7	>=7	0	0	0	0	33.5	26.079	1	2009
5.0-5.4	3	1	0	0	0	0	0	0	0	>=7	>=7	0	0	0	0	37.3	26.2336	0	2013
5.5-5.9	4	0	0	1	0	0	0	0	0	>=7	>=7	0	0	0	0	28.1	24.0346	0	2012
5.5-5.9	4	0	0	0	0	0	0	0	0	>=7	>=7	0	0	0	0	32.3	32.6327	0	2008
4.5-4.9	2	0	0	0	0	0	0	0	0	>=7	>=7	0	0	0	0	32.6	31.0913	0	2011
5.5-5.9	4	0	0	0	0	0	0	0	0	>=7	>=7	0	0	0	0	35.2	23.1934	0	2009
5.0-5.4	3	0	0	0	0	0	0	0	0	>=7	>=7	0	0	0	0	27.1	24.0346	1	2009
5.5-5.9	4	0	0	1	0	0	0	0	0	>=7	>=7	0	0	0	0	28.5	32.8933	1	2011
5.5-5.9	4	0	0	0	0	0	0	0	0	>=7	>=7	0	0	0	0	28.2	28.6328	1	2009
5.5-5.9	4	1	0	0	0	0	0	0	0	>=7	>=7	0	0	0	0	40	24.6528	0	2009
5.5-5.9	4	0	0	0	0	0	0	0	0	>=7	>=7	0	0	0	0	24	32.8731	1	2013
5.5-5.9	4	0	0	0	0	0	0	0	0	>=7	>=7	0	0	0	0	28.4	28.5295	0	2013
5.0-5.4	3	0	0	0	0	0	0	0	0	>=7	>=7	0	0	0	0	35.1	28.3737	1	2011
5.0-5.4	3	1	0	0	0	1	0	0	0	>=7	>=7	0	0	0	0	36	23.6652	1	2011
5.5-5.9	4	1	0	0	0	0	0	0	0	>=7	>=7	0	0	0	0	32.2	26.2227	0	2011
5.0-5.4	3	0	0	1	0	0	0	0	0	>=7	>=7	0	0	0	0	33	28.0843	0	2007
5.5-5.9	4	1	0	0	0	0	0	0	0	>=7	>=7	0	0	0	0	38	28.7963	0	2012
5.0-5.4	3	0	0	0	0	1	0	0	0	>=7	>=7	1	0	0	0	31.1	21.7969	0	2010
5.0-5.4	3	0	0	0	0	0	0	0	0	>=7	>=7	0	0	0	0	28.4	27.024	0	2013
5.0-5.4	3	0	0	1	0	0	0	0	0	>=7	>=7	0	0	0	0	23.1	24.577	0	2009
5.5-5.9	4	0	0	0	0	0	0	0	0	>=7	>=7	0	0	0	0	34.7	29.0819	1	2008
5.0-5.4	3	0	0	0	0	0	0	0	0	>=7	>=7	0	0	0	0	24	25.3902	0	2011
5.5-5.9	4	1	0	0	0	0	0	0	0	>=7	>=7	0	0	0	0	34.3	30.4867	0	2010
4.5-4.9	2	1	0	0	0	0	0	0	0	>=7	>=7	0	0	0	0	30.4	22.3703	1	2010
5.0-5.4	3	0	0	0	0	0	0	0	0	>=7	>=7	0	0	0	0	25.1	25.1486	1	2007
5.0-5.4	3	0	0	0	0	0	0	0	0	>=7	>=7	0	0	0	0	28.2	23.7065	0	2010
5.5-5.9	4	1	0	0	0	0	0	0	0	>=7	>=7	0	0	0	0	32.5	27.6822	0	2011
5.0-5.4	3	0	0	0	0	0	0	0	0	>=7	>=7	0	0	0	0	30.7	19.5059	1	2009
5.0-5.4	3	0	0	0	0	0	0	0	0	>=7	>=7	0	0	0	0	25.3	21.9429	0	2010
4.5-4.9	2	1	0	0	0	0	0	0	0	>=7	>=7	0	0	0	0	32	28.2006	0	2012
4.5-4.9	2	0	0	0	0	0	0	0	0	>=7	>=7	0	0	0	0	34.5	27.6995	0	2008
1.<4.5	1	1	1	1	0	0	0	0	1	>=7	>=7	0	0	0	0	29.9	32.4354	0	2008
5.5-5.9	4	1	0	0	0	0	0	0	0	>=7	>=7	0	0	0	0	29.8	26.2719	0	2009
5.0-5.4	3	0	0	0	0	0	0	0	0	>=7	>=7	0	0	0	0	24.5	32.0312	1	2008
5.5-5.9	4	0	0	0	0	1	0	0	1	>=7	>=7	1	0	0	1	39.1	22.7137	0	2013
6.0-6.4	5	1	0	0	0	0	0	0	0	>=7	>=7	0	0	0	0	39.4	27.3399	0	2013
5.0-5.4	3	0	0	0	0	0	0	0	0	>=7	>=7	0	0	0	0	24.4	25.7812	0	2007
5.0-5.4	3	0	0	0	0	0	0	0	0	>=7	>=7	0	0	0	0	37.6	24.7657	0	2008
5.0-5.4	3	0	0	0	0	0	0	0	0	>=7	>=7	0	0	0	0	37.5	28.7201	0	2011
5.0-5.4	3	0	0	0	0	0	0	0	0	>=7	>=7	0	0	0	0	30.1	26.3556	1	2011
5.0-5.4	3	0	0	0	0	0	0	0	0	>=7	>=7	0	0	0	0	31	25.7031	0	2012
5.0-5.4	3	0	0	0	0	0	0	0	0	>=7	>=7	0	0	0	0	24.3	42.6437	1	2012
5.5-5.9	4	0	0	0	0	0	0	0	1	>=7	>=7	0	0	0	0	34.7	28.5778	0	2008
4.5-4.9	2	1	0	0	0	1	0	0	0	>=7	>=7	0	0	0	0	30.7	28.0843	0	2006
6.0-6.4	5	0	0	0	0	0	0	0	0	>=7	>=7	0	0	0	0	35.3	28.8044	0	2013
4.5-4.9	2	0	0	0	0	0	0	0	0	>=7	>=7	0	0	0	0	41.5	22.5798	0	2013
5.0-5.4	3	1	0	0	0	0	0	0	0	>=7	>=7	0	0	0	0	27	30.7809	1	2012
4.5-4.9	2	0	0	0	0	0	0	0	0	>=7	>=7	0	0	0	0	20.9	29.3222	1	2011
5.0-5.4	3	0	0	0	0	0	0	0	0	>=7	>=7	0	0	0	0	26.8	34.2894	0	2013
5.0-5.4	3	1	1	1	0	0	0	0	1	>=7	>=7	0	0	0	0	32	33.7904	1	2012
5.0-5.4	3	1	0	0	0	0	0	0	0	>=7	>=7	0	0	0	0	24	26.9188	0	2009
6.0-6.4	5	0	0	0	0	0	1	0	0	>=7	>=7	0	0	0	0	25.6	29.3367	1	2011
5.5-5.9	4	0	0	0	0	0	0	0	0	>=7	>=7	0	0	0	0	28.1	26.5731	0	2013
5.0-5.4	3	1	0	0	0	0	0	0	0	>=7	>=7	0	0	0	0	38.3	29.9515	0	2011
5.5-5.9	4	0	0	0	0	1	0	0	0	>=7	>=7	1	0	0	0	29.4	20.3954	1	2009
5.0-5.4	3	0	0	0	0	0	0	0	0	>=7	>=7	0	0	0	0	24	24.8358	1	2008
5.5-5.9	4	0	0	0	0	1	0	0	0	>=7	>=7	0	0	0	0	26.2	23.7118	1	2009
5.5-5.9	4	0	0	0	0	0	0	0	0	>=7	>=7	0	0	0	0	29.2	23.3355	0	2012
5.5-5.9	4	0	0	0	0	0	0	0	0	>=7	>=7	0	0	0	0	31	24.3248	1	2009
5.5-5.9	4	1	1	1	0	0	0	0	0	>=7	>=7	0	0	0	0	30	26.3146	1	2011
5.5-5.9	4	0	0	0	0	0	0	0	0	>=7	>=7	0	0	0	0	27.3	27.7344	0	2010
5.0-5.4	3	0	0	0	0	0	0	0	0	>=7	>=7	0	0	0	0	30.4	28.125	0	2007
5.0-5.4	3	0	0	0	0	0	0	0	0	>=7	>=7	0	0	0	0	26.2	24.2439	1	2009
5.0-5.4	3	1	0	0	0	1	0	0	0	>=7	>=7	1	0	0	0	25.2	26.3672	0	2009
5.0-5.4	3	1	0	0	0	0	0	0	0	>=7	>=7	0	0	0	0	26.4	27.9421	0	2010
>=7	7	1	0	0	0	0	0	0	1	>=7	>=7	0	0	0	0	25.1	34.5405	1	2012
5.5-5.9	4	1	0	0	0	0	0	0	0	>=7	>=7	0	0	0	0	30.7	25.2826	0	2009
5.0-5.4	3	0	0	0	0	0	0	0	0	>=7	>=7	0	0	0	0	26.3	23.892	1	2011
5.5-5.9	4	0	0	0	0	0	0	0	0	>=7	>=7	0	0	0	0	25.2	29.9688	0	2006
5.5-5.9	4	0	0	1	0	0	0	0	0	>=7	>=7	0	0	0	0	27.8	27.7008	0	2007
6.0-6.4	5	0	0	0	0	0	0	0	0	>=7	>=7	0	0	0	0	32.3	27.9172	0	2012
5.5-5.9	4	1	0	0	0	0	0	0	0	>=7	>=7	0	0	0	0	31	27.8876	1	2007
5.0-5.4	3	0	0	0	0	0	0	0	0	>=7	>=7	0	0	0	0	31.9	23.4952	0	2008
4.5-4.9	2	0	0	1	0	0	0	0	0	>=7	>=7	0	0	0	0	22.3	28.5665	0	2008
5.0-5.4	3	0	0	0	0	0	0	0	0	>=7	>=7	0	0	0	0	34.9	24.4444	1	2007
5.0-5.4	3	0	0	0	0	0	0	0	0	>=7	>=7	0	0	0	0	37.5	24	0	2010
5.0-5.4	3	0	0	0	0	0	0	0	1	>=7	>=7	0	0	0	0	23.5	21.5625	0	2009
6.0-6.4	5	0	0	0	0	0	0	0	0	>=7	>=7	0	0	0	0	36	27.4796	0	2012
5.0-5.4	3	0	0	0	0	1	0	0	0	>=7	>=7	1	0	0	1	27.9	25.6369	1	2008
5.5-5.9	4	0	0	0	0	1	0	0	0	>=7	>=7	0	0	0	1	28.8	26.7585	0	2009
5.0-5.4	3	0	0	0	0	0	0	0	0	>=7	>=7	0	0	0	1	27.7	28.0471	1	2006
5.5-5.9	4	1	0	0	0	0	0	0	0	>=7	>=7	0	0	0	0	29.4	25.2595	0	2007
5.0-5.4	3	1	0	0	0	0	0	0	0	>=7	>=7	0	0	0	0	37.9	27.6398	1	2006
5.0-5.4	3	1	0	0	0	0	0	0	0	>=7	>=7	0	0	0	0	40	25.5591	0	2008
5.0-5.4	3	0	0	0	0	0	0	0	0	>=7	>=7	0	0	0	0	28.5	25.3077	1	2007
5.0-5.4	3	0	0	0	0	0	0	0	0	>=7	>=7	0	0	0	0	27.6	23.75	0	2010
5.5-5.9	4	0	0	0	0	0	0	0	0	>=7	>=7	0	0	0	0	25.4	24.093	0	2008
6.5-6.9	6	1	1	0	0	0	0	0	0	>=7	>=7	0	1	0	0	35.1	33.3706	1	2011
4.5-4.9	2	0	0	0	0	0	1	0	0	>=7	>=7	0	0	0	0	26.1	24.977	1	2012
5.0-5.4	3	0	0	0	0	0	0	0	0	>=7	>=7	0	0	0	0	33.2	23.7141	0	2006
4.5-4.9	2	0	0	0	0	0	0	0	0	>=7	>=7	0	0	0	0	27.5	25.8166	1	2011
5.5-5.9	4	1	1	1	0	0	0	0	0	>=7	>=7	0	0	0	0	28.6	26.5625	1	2012
5.0-5.4	3	0	0	1	0	0	0	0	0	>=7	>=7	0	0	0	0	28.1	25.3772	0	2009
6.5-6.9	6	0	0	0	0	0	0	0	1	<7	>=7	0	0	0	1	39.7	42.9687	0	2011
5.0-5.4	3	0	0	0	0	0	0	0	0	>=7	>=7	0	0	0	0	27.3	24.0882	1	2006
5.5-5.9	4	0	0	0	0	0	0	0	0	>=7	>=7	0	0	0	0	29	22.7709	0	2008
5.0-5.4	3	0	0	0	0	0	1	0	0	<7	<7	0	0	0	1	29.8	27.4013	1	2011
5.5-5.9	4	0	0	0	0	0	0	0	0	>=7	>=7	0	0	0	0	35.2	29.843	0	2010
5.0-5.4	3	1	0	0	0	0	0	0	0	>=7	>=7	0	0	0	0	40.4	24.3159	0	2006
5.0-5.4	3	0	0	0	0	0	0	1	0	>=7	>=7	0	0	0	0	35.5	26.227	0	2008
5.0-5.4	3	1	0	0	0	0	0	0	0	>=7	>=7	0	0	0	0	27	24.677	0	2009
5.0-5.4	3	0	0	0	0	0	0	0	0	>=7	>=7	0	0	0	0	30	25.8876	0	2010
5.0-5.4	3	1	1	1	0	0	0	0	0	>=7	>=7	0	0	0	0	30.8	26.1719	1	2010
5.0-5.4	3	0	0	0	0	0	0	0	0	>=7	>=7	0	0	0	0	29.6	23.9766	0	2008
5.5-5.9	4	0	0	0	0	0	1	0	0	>=7	>=7	0	0	0	0	31.3	22.482	1	2012
5.0-5.4	3	0	0	0	0	0	0	0	0	>=7	>=7	0	0	0	0	32.6	30.4898	1	2006
5.5-5.9	4	0	0	1	0	0	0	0	0	>=7	>=7	0	0	0	0	35.5	30.2433	0	2009
5.0-5.4	3	0	0	0	0	0	0	0	0	>=7	>=7	0	0	0	0	35.4	24.5153	1	2012
5.5-5.9	4	0	0	0	0	0	0	0	0	>=7	>=7	0	0	0	0	41	23.9545	0	2008
5.5-5.9	4	0	0	0	0	0	0	0	0	>=7	>=7	0	0	0	0	33.1	24.9909	1	2012
5.0-5.4	3	1	0	0	0	0	0	0	0	>=7	>=7	0	0	0	0	28.7	27.3333	0	2006
5.0-5.4	3	0	0	0	0	0	0	0	0	>=7	>=7	0	0	0	0	35.7	27.9603	0	2010
5.5-5.9	4	0	0	0	0	0	0	0	0	>=7	>=7	0	0	0	0	33	27.2392	0	2009
5.0-5.4	3	0	0	0	0	0	0	0	0	>=7	>=7	1	0	0	0	35.6	26.5625	1	2012
5.0-5.4	3	0	0	0	0	0	0	0	0	>=7	>=7	0	0	0	0	36.2	27.6389	1	2007
5.0-5.4	3	0	0	0	0	0	0	0	0	>=7	>=7	0	0	0	0	38.3	27.169	0	2009
5.5-5.9	4	0	0	0	0	0	0	0	0	>=7	>=7	0	0	0	0	39.6	27.169	0	2010
5.0-5.4	3	1	0	0	0	0	0	0	0	>=7	>=7	0	0	0	0	30	34.6746	0	2008
5.0-5.4	3	0	0	0	0	0	0	0	0	>=7	>=7	0	0	0	0	28.5	26.8977	1	2009
5.0-5.4	3	0	0	0	0	0	0	0	1	>=7	>=7	0	0	0	0	26.1	25.6312	1	2006
4.5-4.9	2	0	0	0	0	0	0	0	0	>=7	>=7	0	0	0	0	29	25.8054	0	2011
5.5-5.9	4	1	0	0	0	0	0	0	1	>=7	>=7	0	0	0	0	35	35.5795	0	2010
5.5-5.9	4	1	0	0	0	0	0	0	0	>=7	>=7	0	0	0	0	26.7	33.241	0	2013
5.0-5.4	3	1	0	0	0	0	0	0	0	>=7	>=7	0	0	0	0	31.7	28.764	1	2012
5.0-5.4	3	0	0	0	0	0	0	0	0	>=7	>=7	0	0	0	0	26.6	21.8939	1	2006
5.0-5.4	3	0	0	0	0	0	0	0	0	>=7	>=7	0	0	0	0	29.3	28.8415	0	2013
5.5-5.9	4	0	0	0	0	0	0	0	0	>=7	>=7	0	0	0	0	28.2	24.3141	1	2008
5.0-5.4	3	0	0	0	0	0	0	0	0	>=7	>=7	0	0	0	0	31.6	24.169	0	2012
5.0-5.4	3	0	0	0	0	0	0	0	0	>=7	>=7	0	0	0	0	28.7	29.162	1	2006
6.0-6.4	5	1	0	0	0	0	0	0	0	>=7	>=7	0	0	0	0	32.4	27.3045	0	2007
4.5-4.9	2	0	0	0	0	0	0	0	0	>=7	>=7	0	0	0	0	21.3	26.5625	1	2006
5.0-5.4	3	0	0	0	0	0	0	0	0	>=7	>=7	0	0	0	0	29.7	22.3111	1	2008
5.5-5.9	4	0	0	0	0	0	0	0	0	>=7	>=7	0	0	0	0	28.2	21.83	1	2011
5.0-5.4	3	1	0	0	0	0	0	0	0	>=7	>=7	0	0	0	0	34.8	25.717	0	2013
5.5-5.9	4	0	0	0	0	0	0	0	0	>=7	>=7	1	0	0	0	30.1	29.34	1	2010
5.5-5.9	4	1	0	0	0	0	0	0	0	>=7	>=7	0	0	0	0	37.3	27.3066	0	2013
5.5-5.9	4	0	0	0	0	0	1	0	0	>=7	>=7	0	0	0	0	28.1	21.3704	1	2006
5.0-5.4	3	0	0	1	0	0	0	0	0	>=7	>=7	0	0	0	0	32.2	29.4925	1	2012
5.0-5.4	3	0	0	0	0	0	0	0	0	>=7	>=7	0	0	0	0	28.5	23.2812	1	2007
5.5-5.9	4	0	0	0	0	1	0	0	0	>=7	>=7	1	0	0	0	31.2	21.3944	1	2009
5.0-5.4	3	0	0	0	0	0	0	0	0	>=7	>=7	0	0	0	0	21.9	29.1317	1	2007
5.0-5.4	3	0	0	0	0	0	0	0	0	>=7	>=7	0	0	0	0	28.2	29.375	0	2013
5.5-5.9	4	0	0	0	0	0	0	0	0	>=7	>=7	0	0	0	0	37.3	24.9581	1	2009
5.0-5.4	3	0	0	0	0	0	0	0	0	>=7	>=7	0	0	0	0	40.3	24.6914	0	2012
5.0-5.4	3	0	0	0	0	0	0	0	0	>=7	>=7	1	0	0	0	40.3	22.1282	1	2012
5.0-5.4	3	0	0	0	0	0	0	0	0	>=7	>=7	0	0	0	0	32.7	21.1446	0	2013
5.5-5.9	4	1	0	0	0	0	0	0	0	>=7	>=7	0	0	0	1	35.4	26.6784	0	2011
5.0-5.4	3	0	0	0	0	0	0	0	0	>=7	>=7	0	0	0	0	33.9	25.0761	1	2013
5.0-5.4	3	0	0	0	0	0	0	0	0	>=7	>=7	0	0	0	0	35.7	25.9375	1	2010
5.0-5.4	3	1	0	0	0	1	0	0	0	<7	>=7	0	0	0	1	37.9	23.9844	0	2012
5.0-5.4	3	0	0	0	0	0	0	0	0	>=7	>=7	0	0	0	0	25.8	26.3439	0	2011
4.5-4.9	2	0	0	0	0	0	0	0	0	>=7	>=7	0	0	0	0	28.9	27.1918	0	2012
5.5-5.9	4	0	0	0	0	0	0	0	0	>=7	>=7	0	0	0	0	27	29.4758	1	2007
5.5-5.9	4	0	0	0	0	0	0	0	0	>=7	>=7	0	0	0	0	31.8	34.4496	1	2009
5.0-5.4	3	1	1	1	0	0	0	0	0	>=7	>=7	0	0	0	0	37	25.4737	1	2013
5.0-5.4	3	0	0	0	0	0	0	0	0	>=7	>=7	0	0	0	0	29.4	30.0781	1	2012
5.5-5.9	4	1	0	0	0	0	0	0	0	>=7	>=7	0	0	0	0	30.5	27.3437	1	2006
5.5-5.9	4	1	0	0	0	0	0	0	0	>=7	>=7	0	0	0	0	28.5	36.8069	0	2011
5.5-5.9	4	0	0	0	0	0	0	0	0	>=7	>=7	0	0	0	0	29.8	26.5625	1	2007
5.0-5.4	3	0	0	0	0	0	0	0	0	>=7	>=7	0	0	0	0	26.8	24.2439	0	2008
5.0-5.4	3	1	0	0	0	0	0	0	0	>=7	>=7	0	0	0	0	28.3	28.3501	0	2008
>=7	7	0	0	0	0	0	0	0	0	>=7	>=7	0	0	0	0	29.9	34.0999	1	2007
6.5-6.9	6	0	0	0	0	0	0	0	0	>=7	>=7	0	0	0	0	32.4	32.1051	0	2010
5.0-5.4	3	0	0	0	0	0	0	0	0	>=7	>=7	0	0	0	0	35.8	27.989	1	2007
5.0-5.4	3	0	0	0	0	0	0	0	0	>=7	>=7	0	0	0	0	31.4	24.0983	0	2009
5.5-5.9	4	1	1	1	0	0	0	0	0	>=7	>=7	0	0	0	0	38.6	26.1752	1	2006
5.5-5.9	4	0	0	0	0	0	0	0	0	>=7	>=7	0	0	0	0	28.7	22.7481	1	2009
5.0-5.4	3	0	0	0	0	0	1	0	0	>=7	>=7	0	0	0	0	29.9	22.8906	1	2007
4.5-4.9	2	0	0	0	0	0	0	0	0	>=7	>=7	0	0	0	0	32.4	29.7778	0	2009
5.0-5.4	3	1	0	0	0	0	0	0	1	>=7	>=7	0	0	0	0	31.7	24.0346	1	2010
5.5-5.9	4	0	0	0	0	1	0	0	0	>=7	>=7	1	0	0	1	29.2	25	0	2007
5.5-5.9	4	1	1	1	0	0	0	0	0	>=7	>=7	0	0	0	0	32.2	28.4444	1	2006
5.5-5.9	4	1	0	0	0	0	0	0	0	>=7	>=7	0	0	0	0	32.5	24.0444	0	2008
5.0-5.4	3	0	0	0	0	0	0	0	0	>=7	>=7	0	0	0	1	25.6	34.8584	1	2013
5.0-5.4	3	0	0	0	0	0	0	0	0	>=7	>=7	0	0	0	1	28.1	28.9445	1	2013
5.5-5.9	4	1	0	0	0	0	0	0	0	>=7	>=7	0	0	0	0	36.6	28.764	0	2013
4.5-4.9	2	0	0	0	0	0	0	0	0	>=7	>=7	0	0	0	0	32.5	23.3323	1	2012
5.5-5.9	4	0	0	0	0	0	0	0	0	>=7	>=7	0	0	0	0	29.2	27.6562	1	2006
5.5-5.9	4	1	0	0	0	1	0	0	0	>=7	>=7	0	0	0	0	29	35.3798	0	2008
5.5-5.9	4	0	0	0	0	0	0	0	0	>=7	>=7	0	0	0	0	31.1	22.8085	0	2009
4.5-4.9	2	1	0	1	0	0	0	0	0	>=7	>=7	0	0	0	1	24.2	24.841	0	2010
4.5-4.9	2	1	0	0	0	0	0	0	0	>=7	>=7	0	0	0	0	25.8	24.9915	0	2011
5.5-5.9	4	0	0	0	0	0	0	0	0	>=7	>=7	0	0	0	0	36.9	29.7592	0	2008
5.0-5.4	3	0	0	0	0	0	0	0	0	>=7	>=7	0	0	0	0	25.7	35.6513	1	2007
5.5-5.9	4	0	0	0	0	0	0	0	0	>=7	>=7	0	0	0	0	33.8	32.2518	1	2008
5.0-5.4	3	0	0	0	0	0	0	0	0	>=7	>=7	0	0	0	0	24.4	28.5585	0	2012
5.0-5.4	3	0	0	0	0	0	0	0	0	>=7	>=7	0	0	0	0	23.5	27.0552	0	2007
5.0-5.4	3	0	0	0	0	0	0	0	0	>=7	>=7	0	0	0	0	35.1	27.1809	0	2010
4.5-4.9	2	0	0	1	0	0	0	0	0	>=7	>=7	0	0	0	0	23.4	28.306	0	2010
5.5-5.9	4	0	0	0	0	0	0	0	0	>=7	>=7	0	0	0	0	30.9	26.3179	0	2012
5.0-5.4	3	0	0	1	0	0	0	0	0	>=7	>=7	0	0	0	0	30.3	29.2969	1	2012
6.0-6.4	5	1	0	0	0	0	0	0	0	>=7	>=7	0	0	0	0	24.5	34.1797	1	2007
5.0-5.4	3	0	0	0	0	0	0	0	0	>=7	>=7	0	0	0	0	27.4	27.3437	1	2013
5.0-5.4	3	0	0	0	0	0	0	0	0	>=7	>=7	0	0	0	0	31.3	24.0444	1	2012
5.5-5.9	4	1	1	1	0	0	0	0	0	>=7	>=7	0	0	0	0	33.2	25.0781	1	2007
5.5-5.9	4	1	0	0	0	0	0	0	0	>=7	>=7	0	0	0	0	34.4	24.1288	0	2008
5.0-5.4	3	0	0	1	0	0	0	0	0	>=7	>=7	0	0	0	0	19.9	23.1473	1	2007
1.<4.5	1	0	0	0	0	0	0	0	0	>=7	>=7	0	0	0	1	19.9	23.3176	1	2007
4.5-4.9	2	0	0	0	0	0	0	0	0	>=7	>=7	0	0	0	0	31.6	27.7767	1	2006
5.0-5.4	3	0	0	0	0	0	0	0	0	>=7	>=7	0	0	0	0	35.1	27.2874	0	2010
1.<4.5	1	1	1	1	0	1	0	0	1	>=7	>=7	0	0	0	0	33.3	32.2725	1	2013
4.5-4.9	2	0	0	0	0	0	0	0	0	>=7	>=7	0	0	0	0	30.6	30.5515	1	2007
5.0-5.4	3	0	0	0	0	1	0	0	0	>=7	>=7	1	0	0	1	28.4	25.0138	1	2010
5.0-5.4	3	0	0	0	0	0	1	0	0	>=7	>=7	0	0	0	0	24.2	27.7008	1	2011
5.0-5.4	3	1	1	1	0	0	0	0	0	>=7	>=7	0	0	0	0	20.7	24.0346	1	2006
4.5-4.9	2	0	0	1	0	0	0	0	0	>=7	>=7	0	0	0	0	30.2	24.977	0	2011
5.5-5.9	4	0	0	0	0	0	0	0	0	>=7	>=7	0	0	0	0	33.3	25.3966	1	2009
5.0-5.4	3	1	0	0	0	0	0	0	0	>=7	>=7	0	0	0	0	26.5	24.7285	1	2007
5.5-5.9	4	0	0	0	0	0	0	0	0	>=7	>=7	0	0	0	0	34.5	23.7007	1	2007
5.5-5.9	4	0	0	0	0	0	0	0	0	>=7	>=7	0	0	0	0	39.4	25.3391	0	2012
5.0-5.4	3	1	0	0	0	0	0	0	0	>=7	>=7	1	0	0	0	36.2	27.483	1	2007
6.0-6.4	5	1	0	0	0	0	0	0	0	>=7	>=7	0	0	0	0	28	27.8307	0	2008
5.0-5.4	3	0	0	0	0	0	0	0	0	>=7	>=7	0	0	0	0	23	25.9375	1	2007
4.5-4.9	2	1	1	1	0	0	0	0	0	>=7	>=7	0	0	0	0	29.6	26.3702	1	2011
5.0-5.4	3	0	0	0	0	0	0	0	0	>=7	>=7	0	0	0	0	30.5	23.1405	0	2007
5.0-5.4	3	1	0	0	0	0	0	0	0	>=7	>=7	0	0	0	0	35.7	25.2248	1	2013
5.5-5.9	4	0	0	0	0	0	0	0	0	>=7	>=7	0	0	0	0	22.4	26.2188	0	2012
5.0-5.4	3	1	1	1	0	0	0	0	0	>=7	>=7	0	0	0	0	24.8	29.5833	1	2008
5.0-5.4	3	1	0	0	0	0	0	0	0	>=7	>=7	0	1	0	0	28.9	27.7254	0	2012
5.0-5.4	3	1	0	0	0	1	0	0	0	>=7	>=7	0	0	0	0	31.2	38.404	1	2007
4.5-4.9	2	0	0	0	0	0	0	0	0	>=7	>=7	0	0	0	0	35.8	21.1556	0	2012
5.0-5.4	3	0	0	0	0	0	0	0	0	>=7	>=7	0	0	0	0	31.5	22.7839	1	2013
5.0-5.4	3	0	0	0	0	0	1	0	0	>=7	>=7	0	0	0	0	31.4	28.0624	1	2012
5.0-5.4	3	0	0	0	0	0	0	0	0	>=7	>=7	0	0	0	0	30.8	33.7925	0	2012
4.5-4.9	2	1	0	0	0	0	0	0	0	>=7	>=7	0	0	0	0	31.8	26.5339	0	2013
6.0-6.4	5	0	0	0	0	0	0	0	0	>=7	>=7	0	0	0	0	27.9	24.6094	1	2007
5.0-5.4	3	0	0	0	0	0	0	0	0	>=7	>=7	0	0	0	0	26.7	24.9477	1	2007
5.5-5.9	4	1	0	0	0	0	0	0	0	>=7	>=7	0	0	0	0	26.8	24.7005	0	2013
5.0-5.4	3	0	0	0	0	0	0	0	0	>=7	>=7	0	0	0	0	25.2	24.9014	1	2011
5.0-5.4	3	0	0	1	0	1	0	0	0	>=7	>=7	1	0	0	0	24.5	20.7031	1	2011
5.0-5.4	3	0	0	0	0	0	0	0	0	>=7	>=7	0	0	0	0	29	24.375	1	2008
5.0-5.4	3	0	0	1	0	0	0	0	0	>=7	>=7	0	0	0	0	32	23.4375	0	2011
5.5-5.9	4	1	1	1	0	0	0	0	0	>=7	>=7	0	0	0	0	31.6	30.4687	1	2007
5.5-5.9	4	1	0	0	0	0	0	0	0	>=7	>=7	0	0	0	0	33.6	29.3087	0	2009
5.0-5.4	3	0	0	0	0	0	0	0	0	>=7	>=7	0	0	0	0	34.3	25.2343	1	2011
6.0-6.4	5	1	0	0	0	0	0	0	0	>=7	>=7	0	0	0	0	29.5	30.6285	1	2009
5.5-5.9	4	1	0	0	0	0	0	0	0	>=7	>=7	0	0	0	0	33.2	42.2893	0	2010
5.0-5.4	3	0	0	1	0	0	0	0	0	>=7	>=7	0	0	0	0	32	20.5151	0	2009
5.0-5.4	3	0	0	0	0	0	0	0	0	>=7	>=7	1	0	0	0	31.9	33.9289	1	2009
6.5-6.9	6	1	1	0	0	0	0	0	0	>=7	>=7	0	1	0	1	36.4	30.2801	0	2012
4.5-4.9	2	0	0	0	0	0	0	0	0	>=7	>=7	0	0	0	0	29.4	24.9904	1	2010
5.0-5.4	3	1	1	1	0	0	0	0	0	>=7	>=7	0	0	0	0	31.6	24.7576	1	2013
6.0-6.4	5	1	0	0	0	0	0	0	1	>=7	>=7	0	0	0	0	39.1	36.3281	1	2008
6.0-6.4	5	1	1	1	0	0	0	0	0	>=7	>=7	0	0	0	0	25.9	36.0648	1	2011
6.0-6.4	5	0	0	0	0	0	0	0	0	>=7	>=7	0	0	0	0	34	29.3724	1	2010
6.0-6.4	5	0	0	1	0	0	0	0	0	>=7	>=7	0	0	0	0	35.4	29.3623	0	2012
4.5-4.9	2	0	0	0	0	0	0	0	0	>=7	>=7	0	0	0	0	29.6	21.262	0	2013
5.0-5.4	3	0	0	0	0	0	0	0	0	>=7	>=7	0	0	0	0	29.9	24.287	0	2011
5.5-5.9	4	0	0	1	0	0	0	0	0	>=7	>=7	0	0	0	0	29.4	28.5665	0	2009
5.0-5.4	3	1	0	0	0	0	0	0	0	>=7	>=7	0	0	0	0	33.2	23.4375	0	2011
5.0-5.4	3	0	0	0	0	1	0	0	0	>=7	>=7	0	0	0	0	29.2	31.3197	1	2013
5.0-5.4	3	0	0	0	0	0	0	0	0	>=7	>=7	1	0	0	0	29	24.9307	1	2007
5.5-5.9	4	1	0	0	0	0	0	0	0	>=7	>=7	0	0	0	0	37.7	36.5126	0	2010
5.5-5.9	4	0	0	0	0	0	0	0	0	>=7	>=7	0	0	0	0	28.9	25.8203	1	2009
5.5-5.9	4	0	0	0	0	0	0	0	0	>=7	>=7	0	0	0	0	30.3	25.5469	0	2011
5.5-5.9	4	0	0	1	0	0	0	0	0	>=7	>=7	0	0	0	0	21.1	21.0937	0	2008
5.0-5.4	3	0	0	0	0	0	0	0	0	>=7	>=7	0	0	0	0	28.9	28.2931	0	2007
5.0-5.4	3	0	0	1	0	0	0	0	0	>=7	>=7	0	0	0	0	26.8	30.1205	0	2011
5.5-5.9	4	0	0	0	0	0	0	0	0	>=7	>=7	0	0	0	0	34.3	24.5205	1	2013
6.0-6.4	5	0	0	0	0	1	0	0	0	>=7	>=7	1	0	0	1	39.5	25.641	1	2007
5.5-5.9	4	0	0	0	0	0	0	0	0	>=7	>=7	0	0	0	0	30.6	31.5254	1	2007
6.0-6.4	5	0	0	0	0	0	0	0	0	>=7	>=7	0	1	0	0	35.9	34.4496	0	2013
5.5-5.9	4	0	0	0	0	0	1	0	0	>=7	>=7	0	0	0	0	29.9	27.4756	1	2007
5.0-5.4	3	0	0	0	0	0	0	0	0	>=7	>=7	0	0	0	0	23.6	23.634	1	2007
5.0-5.4	3	0	0	1	0	0	0	0	0	>=7	>=7	0	0	0	0	21.7	27.852	0	2009
6.0-6.4	5	1	1	1	0	0	0	0	1	>=7	>=7	0	0	0	0	29.6	32.4467	1	2012
5.0-5.4	3	0	0	0	0	0	0	0	0	>=7	>=7	0	0	0	0	29.6	27.745	1	2007
1.<4.5	1	0	0	0	0	0	0	0	0	>=7	>=7	0	0	0	0	30.9	29.5225	0	2007
5.0-5.4	3	1	1	1	0	0	0	0	0	>=7	>=7	0	0	0	0	32	24.6094	1	2007
5.0-5.4	3	0	0	0	0	0	0	0	0	>=7	>=7	0	0	0	0	30	26.5585	0	2009
5.0-5.4	3	0	0	0	0	0	0	0	0	>=7	>=7	0	0	0	0	29.6	20.9142	1	2012
5.0-5.4	3	0	0	0	0	0	0	0	0	>=7	>=7	0	0	0	0	29.7	23.9674	1	2007
4.5-4.9	2	1	0	0	0	0	0	0	0	>=7	>=7	0	0	0	0	28.5	21.6311	0	2010
5.5-5.9	4	0	0	0	0	0	0	0	0	>=7	>=7	0	0	0	0	35.8	26.5625	0	2009
5.5-5.9	4	0	0	1	0	1	0	0	0	>=7	>=7	1	0	0	1	27.9	22.4609	0	2012
5.5-5.9	4	0	0	1	0	0	0	0	0	>=7	>=7	0	0	0	0	24.7	27.3646	1	2007
5.5-5.9	4	0	0	1	0	1	0	0	0	>=7	>=7	0	0	0	0	26.8	29.3848	0	2009
5.5-5.9	4	0	0	0	0	0	0	0	0	>=7	>=7	0	0	0	0	28.7	29.3848	0	2011
5.5-5.9	4	0	0	0	0	0	0	0	0	>=7	>=7	0	0	0	1	25	25.301	1	2008
5.0-5.4	3	0	0	0	0	0	0	0	0	>=7	>=7	0	0	0	0	26.9	24.7676	0	2011
5.0-5.4	3	0	0	1	0	0	0	0	0	>=7	>=7	0	0	0	0	32.7	21.299	0	2012
5.0-5.4	3	1	0	0	0	0	0	0	0	>=7	>=7	0	0	0	0	32	26.2378	1	2008
5.0-5.4	3	1	0	0	0	0	0	0	0	>=7	>=7	0	0	0	0	37.1	26.4706	0	2013
5.0-5.4	3	1	1	1	0	0	0	0	0	>=7	>=7	0	0	0	0	35.4	27.5108	1	2007
6.0-6.4	5	1	0	1	0	0	0	0	0	>=7	>=7	0	0	0	0	28.4	36.7476	0	2009
5.0-5.4	3	1	1	1	0	0	0	0	0	>=7	>=7	0	0	0	0	32.2	29.9967	1	2008
5.0-5.4	3	0	0	0	0	0	0	0	0	>=7	>=7	0	0	0	0	23.6	23.538	1	2008
5.0-5.4	3	0	0	0	0	0	0	0	0	>=7	>=7	0	0	0	0	35.3	24.287	1	2013
5.0-5.4	3	0	0	0	0	0	0	0	0	>=7	>=7	0	0	0	0	26.7	24.9014	0	2009
5.0-5.4	3	0	0	1	0	0	0	0	0	>=7	>=7	0	0	0	0	28.8	25.1562	0	2011
5.0-5.4	3	1	0	0	0	0	0	0	0	>=7	>=7	0	0	0	0	38.9	28.956	0	2013
5.5-5.9	4	1	0	0	0	0	0	0	0	>=7	>=7	0	0	0	0	26.9	29.5525	0	2010
5.5-5.9	4	0	0	0	0	0	0	0	0	>=7	>=7	0	0	0	0	32.5	30.5083	0	2007
5.0-5.4	3	0	0	1	0	0	0	0	0	>=7	>=7	0	0	0	0	30.1	19.8714	1	2009
5.0-5.4	3	0	0	0	0	0	1	0	0	>=7	>=7	0	0	0	0	32.7	24.5554	1	2009
5.0-5.4	3	0	0	0	0	0	0	0	0	>=7	>=7	0	0	0	0	35.4	24.315	0	2012
5.5-5.9	4	0	0	0	0	0	0	0	0	>=7	>=7	0	0	0	0	24.4	33.0469	1	2007
5.0-5.4	3	1	0	0	0	0	0	0	0	>=7	>=7	0	0	0	0	35.6	30.5701	1	2011
5.0-5.4	3	0	0	0	0	1	0	0	0	>=7	>=7	1	0	0	1	36.4	24.4352	1	2007
6.0-6.4	5	0	0	1	0	0	0	0	0	>=7	>=7	0	0	0	0	34.9	31.2386	0	2012
5.0-5.4	3	0	0	0	0	0	0	0	0	>=7	>=7	0	0	0	0	36.9	27.6134	0	2007
5.0-5.4	3	0	0	1	0	0	0	0	0	>=7	>=7	0	0	0	0	37.2	27.6398	0	2008
5.5-5.9	4	0	0	0	0	1	0	0	0	>=7	>=7	1	0	0	1	25	31.2394	1	2009
5.5-5.9	4	0	0	0	0	0	0	0	0	>=7	>=7	0	0	0	0	28.2	36.1323	0	2012
5.0-5.4	3	1	0	0	0	0	0	0	0	>=7	>=7	0	0	0	0	33.4	30.4438	0	2013
5.0-5.4	3	0	0	0	0	0	0	0	0	>=7	>=7	0	0	0	0	30.4	28.4008	0	2011
5.5-5.9	4	0	0	0	0	0	0	0	0	>=7	>=7	0	0	0	0	33.9	26.8508	0	2011
5.5-5.9	4	1	0	0	0	0	0	0	0	>=7	>=7	0	0	0	0	30.9	31.1634	0	2008
5.5-5.9	4	1	0	0	0	0	0	0	0	>=7	>=7	0	1	0	0	28.5	32.4547	0	2010
4.5-4.9	2	0	0	0	0	0	0	0	0	>=7	>=7	0	0	0	0	25.1	24.5243	1	2008
5.0-5.4	3	1	1	1	0	0	0	0	0	>=7	>=7	0	0	0	0	26.5	22.8057	1	2009
5.5-5.9	4	0	0	0	0	0	0	0	0	>=7	>=7	0	0	0	0	31.6	34.3698	0	2012
5.0-5.4	3	0	0	1	0	0	0	0	0	>=7	>=7	0	0	0	0	19.7	23.8281	1	2010
5.5-5.9	4	1	0	0	0	0	0	0	0	>=7	>=7	0	0	0	0	27	28.6254	1	2009
5.0-5.4	3	0	0	0	0	0	0	0	0	>=7	>=7	0	0	0	0	38.8	24.6755	1	2008
5.0-5.4	3	1	0	0	0	0	0	0	0	>=7	>=7	0	0	0	0	37.8	24.0346	0	2010
5.0-5.4	3	1	1	1	0	1	0	0	0	>=7	>=7	0	0	0	0	29.2	26.0375	1	2008
5.5-5.9	4	1	0	0	0	1	0	0	0	>=7	>=7	1	0	0	0	31.8	27.2392	0	2011
5.5-5.9	4	0	0	0	0	1	0	0	0	>=7	>=7	0	0	0	1	35.8	29.903	0	2009
5.5-5.9	4	0	0	0	0	1	0	0	0	>=7	>=7	0	0	0	0	28.8	30.0739	0	2009
5.0-5.4	3	0	0	0	0	0	0	0	0	>=7	>=7	0	0	0	0	27.8	23.4375	1	2012
4.5-4.9	2	0	0	0	0	0	0	0	0	>=7	>=7	0	0	0	0	35	24.3911	0	2013
5.5-5.9	4	0	0	0	0	0	0	0	0	>=7	>=7	0	0	0	0	33.8	28.179	1	2009
5.0-5.4	3	0	0	0	0	0	0	0	0	>=7	>=7	0	0	0	0	23.6	27.2216	0	2012
5.5-5.9	4	1	0	0	0	0	0	0	0	>=7	>=7	0	0	0	0	26.8	29.865	0	2011
5.5-5.9	4	0	0	0	0	0	0	0	0	>=7	>=7	0	0	0	0	24.5	27.7344	1	2008
5.0-5.4	3	1	0	0	0	0	0	0	0	>=7	>=7	0	0	0	0	29.8	26.807	1	2013
5.0-5.4	3	0	0	0	0	0	0	0	0	>=7	>=7	0	0	0	0	38.6	31.1649	0	2013
5.0-5.4	3	0	0	0	0	0	0	0	0	>=7	>=7	0	0	0	0	31.1	23.7118	1	2009
5.5-5.9	4	1	0	0	0	0	0	0	0	>=7	>=7	0	0	0	0	29.9	30.3391	0	2009
5.5-5.9	4	0	0	0	0	0	0	0	0	>=7	>=7	0	0	0	0	33.1	23.3377	0	2010
5.0-5.4	3	0	0	0	0	0	0	0	0	>=7	>=7	0	0	0	0	32.5	23.2389	1	2011
4.5-4.9	2	1	0	0	0	0	0	0	0	>=7	>=7	0	0	0	1	26.5	30.3593	1	2008
5.0-5.4	3	1	0	0	0	0	0	0	0	>=7	>=7	0	0	0	0	29.3	26.986	0	2011
4.5-4.9	2	0	0	0	0	0	1	0	0	>=7	>=7	0	1	0	0	24.1	27.4747	1	2008
5.0-5.4	3	1	0	0	0	0	0	0	0	>=7	>=7	0	0	0	0	39.6	23.533	1	2011
5.0-5.4	3	0	0	0	0	0	0	0	0	>=7	>=7	0	0	0	0	25.5	34.0479	1	2008
5.0-5.4	3	0	0	0	0	0	0	0	0	<7	<7	0	0	0	1	32.4	29.2421	0	2011
5.0-5.4	3	0	0	0	0	0	0	0	0	>=7	>=7	0	0	0	0	28.5	24.974	0	2010
5.5-5.9	4	0	0	0	1	0	0	0	0	>=7	>=7	0	0	0	0	26.3	25.6369	0	2009
5.5-5.9	4	0	0	0	0	0	0	0	0	>=7	>=7	0	0	0	0	25.8	28.8828	0	2011
5.5-5.9	4	0	0	0	0	0	0	0	0	>=7	>=7	0	0	0	0	32.6	25.8726	1	2009
5.0-5.4	3	1	1	1	0	0	0	0	0	>=7	>=7	0	0	0	0	26.4	23.1533	1	2008
1.<4.5	1	0	0	0	0	0	0	0	0	>=7	>=7	0	0	0	0	29.7	29.3848	1	2010
4.5-4.9	2	0	0	0	0	0	0	0	0	>=7	>=7	0	0	0	0	31.6	24.1406	1	2008
6.0-6.4	5	0	0	0	1	0	0	0	0	>=7	>=7	0	0	0	0	28	29.6665	1	2009
5.0-5.4	3	1	0	0	0	0	0	0	0	>=7	>=7	0	0	0	0	34.8	25.7211	0	2013
4.5-4.9	2	1	0	0	0	0	0	0	0	>=7	>=7	0	0	0	0	36.7	24.5935	0	2012
5.5-5.9	4	0	0	0	0	0	0	0	0	>=7	>=7	0	0	0	0	35.1	25.932	1	2013
5.5-5.9	4	0	0	1	0	0	0	0	0	>=7	>=7	0	0	0	0	28.3	24.8703	0	2008
5.0-5.4	3	0	0	0	1	0	1	0	0	>=7	>=7	0	0	0	1	24.9	21.3675	1	2011
5.5-5.9	4	0	0	0	0	0	0	0	0	>=7	>=7	0	0	0	0	27.1	32.0312	1	2008
5.5-5.9	4	0	0	0	0	0	0	0	0	>=7	>=7	0	0	0	0	27.6	31.975	0	2009
5.5-5.9	4	1	0	0	0	0	0	0	0	>=7	>=7	0	0	0	0	23.4	33.2031	1	2008
4.5-4.9	2	1	0	0	0	0	0	0	0	>=7	>=7	0	0	0	0	32.2	27.102	0	2012
6.5-6.9	6	0	0	0	0	0	0	0	0	>=7	>=7	0	0	0	0	29.5	37.1862	0	2008
5.5-5.9	4	0	0	0	0	0	0	0	0	>=7	>=7	0	0	0	0	25.9	24.0817	1	2008
5.0-5.4	3	0	0	0	0	0	0	0	0	>=7	>=7	0	0	0	0	29.7	26.7094	1	2008
5.0-5.4	3	0	0	0	0	0	0	0	0	>=7	>=7	0	0	0	0	29.1	31.2049	0	2013
5.0-5.4	3	0	0	0	0	0	0	0	0	>=7	>=7	0	0	0	0	31.5	26.7916	0	2013
5.0-5.4	3	0	0	0	0	1	0	0	0	>=7	>=7	0	0	0	0	30.5	27.466	1	2011
6.5-6.9	6	1	1	1	0	0	0	0	1	>=7	>=7	0	0	0	0	26.3	39.5421	1	2008
5.5-5.9	4	0	0	0	0	0	0	0	0	>=7	>=7	1	0	0	0	37.4	24.3418	1	2008
5.5-5.9	4	0	0	0	0	0	0	0	0	>=7	>=7	0	0	0	0	38.6	31.8002	0	2013
5.0-5.4	3	0	0	0	0	0	0	0	0	>=7	>=7	0	0	0	0	32	27.0312	1	2013
5.0-5.4	3	0	0	0	0	0	0	0	0	>=7	>=7	0	0	0	0	25.8	26.0444	1	2010
5.0-5.4	3	0	0	0	0	0	0	0	0	>=7	>=7	0	0	0	0	30.4	25.1953	1	2008
4.5-4.9	2	0	0	0	0	0	0	0	0	>=7	>=7	0	0	0	0	33.5	26.7187	0	2011
5.0-5.4	3	1	1	0	0	0	0	0	0	>=7	>=7	0	0	0	0	31.8	23.8751	1	2008
5.5-5.9	4	1	0	0	0	0	0	0	0	>=7	>=7	0	0	0	0	36.9	25.5057	0	2013
4.5-4.9	2	1	0	0	0	0	0	0	0	>=7	>=7	0	0	0	0	33.5	27.5312	0	2012
5.0-5.4	3	0	0	0	0	0	0	0	0	>=7	>=7	0	0	0	0	25.4	23.3067	1	2010
5.0-5.4	3	0	0	1	0	0	0	0	0	>=7	>=7	0	0	0	0	28.5	23.4552	0	2013
5.5-5.9	4	0	0	0	0	0	0	0	0	>=7	>=7	0	0	0	0	35	23.8531	0	2008
5.0-5.4	3	0	0	0	0	0	0	0	0	>=7	>=7	0	0	0	0	38.6	27.1875	0	2011
5.0-5.4	3	0	0	0	0	1	0	0	0	>=7	>=7	0	0	0	0	30.9	25.7812	1	2012
5.0-5.4	3	1	1	1	0	0	0	0	0	>=7	>=7	0	0	0	0	27.8	24.8358	1	2011
5.0-5.4	3	0	0	0	0	0	0	0	0	>=7	>=7	0	0	0	0	27.8	21.7013	1	2009
5.0-5.4	3	0	0	0	0	0	0	0	0	>=7	>=7	0	0	0	0	30.2	21.1932	0	2012
6.5-6.9	6	1	0	0	0	0	0	0	0	>=7	>=7	0	0	0	0	29.5	30.7556	1	2009
5.0-5.4	3	1	0	0	0	0	0	0	0	>=7	>=7	0	0	0	0	24.7	26.2778	0	2011
>=7	7	0	0	0	0	1	0	0	0	>=7	>=7	1	0	0	0	24.8	34.9636	0	2011
4.5-4.9	2	0	0	0	0	1	0	0	0	>=7	>=7	1	0	0	0	35.6	24.4646	1	2011
6.0-6.4	5	1	0	0	0	0	0	0	0	>=7	>=7	0	0	0	0	29.2	29.3393	1	2008
4.5-4.9	2	1	0	0	0	1	0	0	0	>=7	>=7	1	0	0	1	27.9	27.5535	1	2008
5.5-5.9	4	1	0	0	0	0	0	0	1	>=7	>=7	0	0	0	0	33.1	27.5556	0	2011
5.0-5.4	3	0	0	1	0	0	0	0	0	>=7	>=7	0	0	0	0	28.1	30.0937	1	2008
5.0-5.4	3	0	0	0	0	0	0	0	0	>=7	>=7	0	0	0	0	19.3	23.0796	1	2009
5.5-5.9	4	0	0	0	0	0	0	0	1	>=7	>=7	0	0	0	0	30.3	27.852	1	2012
5.0-5.4	3	1	0	0	0	0	0	0	0	>=7	>=7	0	0	0	0	27.1	36.9513	0	2011
4.5-4.9	2	0	0	1	0	1	0	0	0	>=7	>=7	0	0	0	0	27.4	21.5611	1	2012
4.5-4.9	2	0	0	0	0	0	0	0	0	>=7	>=7	0	0	0	0	27.4	22.9421	1	2013
5.5-5.9	4	0	0	0	0	0	0	0	0	>=7	>=7	0	0	0	0	27.3	25.3906	1	2008
5.5-5.9	4	0	0	0	0	0	0	0	0	>=7	>=7	0	0	0	0	21.7	27.8876	1	2012
5.0-5.4	3	0	0	0	0	0	0	0	0	>=7	>=7	0	0	0	0	30.5	25.204	0	2011
5.5-5.9	4	0	0	0	0	0	0	0	1	>=7	>=7	0	0	0	0	27.3	27.2656	0	2008
5.5-5.9	4	0	0	0	0	0	0	0	0	>=7	>=7	0	0	0	0	24.9	23.9188	1	2009
5.0-5.4	3	0	0	1	0	0	0	0	0	>=7	>=7	0	0	0	0	27.6	24.4204	0	2011
5.0-5.4	3	0	0	0	0	0	0	0	0	>=7	>=7	0	0	0	0	31.1	29.4331	0	2012
4.5-4.9	2	0	0	0	0	0	0	0	0	>=7	>=7	0	0	0	0	29.1	28.8462	0	2011
5.0-5.4	3	1	1	1	0	0	0	0	0	<7	>=7	0	0	0	1	27.8	24.4745	1	2013
5.0-5.4	3	0	0	0	0	0	0	0	0	>=7	>=7	1	0	0	0	39.2	25.8876	1	2010
5.5-5.9	4	1	1	1	0	0	0	1	0	>=7	>=7	0	0	0	0	28.7	33.0237	1	2010
5.5-5.9	4	0	0	0	0	0	0	0	0	>=7	>=7	0	0	0	0	31.6	24.7768	1	2011
6.5-6.9	6	0	0	0	0	0	0	0	0	>=7	>=7	0	0	0	0	26.5	31.7815	1	2010
5.5-5.9	4	0	0	0	0	0	0	0	0	>=7	>=7	0	0	0	0	23.1	24.2187	1	2009
5.5-5.9	4	0	0	0	0	0	0	0	0	>=7	>=7	0	0	0	0	24.5	26.9531	0	2010
5.0-5.4	3	0	0	0	0	0	0	0	0	>=7	>=7	0	0	0	0	25.1	24.5675	0	2010
5.0-5.4	3	0	0	0	0	0	0	0	0	>=7	>=7	0	0	0	1	30.3	27.3437	1	2009
5.5-5.9	4	0	0	0	0	0	0	0	0	>=7	>=7	0	0	0	0	28.5	25.6369	1	2010
5.5-5.9	4	0	0	0	0	1	0	0	0	>=7	>=7	0	0	0	0	34.2	23.6128	1	2012
5.0-5.4	3	0	0	1	0	0	0	0	0	>=7	>=7	0	0	0	0	32.4	22.3933	1	2013
>=7	7	1	0	0	0	0	0	0	0	>=7	>=7	0	0	0	0	26.4	34.375	0	2012
5.0-5.4	3	1	0	0	0	0	0	0	0	>=7	>=7	0	0	0	0	36	24.974	0	2013
5.5-5.9	4	0	0	0	0	0	1	0	0	>=7	>=7	0	0	0	0	27.7	27.1094	1	2010
5.5-5.9	4	0	0	0	0	0	0	0	0	>=7	>=7	0	0	0	0	35.5	25	1	2010
5.5-5.9	4	0	0	0	0	0	0	0	0	>=7	>=7	0	0	0	0	37.7	24.6875	0	2012
5.5-5.9	4	0	0	0	0	0	0	0	0	>=7	>=7	0	0	0	0	24	24.7768	1	2010
5.0-5.4	3	0	0	0	0	0	0	0	0	>=7	>=7	0	0	0	1	32	33.4073	1	2010
5.0-5.4	3	1	0	0	0	1	0	0	0	>=7	>=7	1	0	0	1	33.8	28.578	0	2010
5.5-5.9	4	0	0	0	0	1	0	0	0	>=7	>=7	0	0	0	0	35.3	27.2847	1	2008
6.0-6.4	5	0	0	0	0	1	0	0	0	>=7	>=7	1	0	0	1	40.3	30.2649	0	2013
5.5-5.9	4	0	0	0	0	0	0	0	0	>=7	>=7	0	0	0	0	34.4	29.3623	1	2009
1.<4.5	1	0	0	0	0	0	0	0	0	>=7	>=7	0	0	0	0	31.5	28.8415	0	2011
5.5-5.9	4	0	0	0	0	0	0	0	0	>=7	>=7	0	0	0	0	25.5	30.8463	1	2008
4.5-4.9	2	1	0	0	0	0	0	0	0	>=7	>=7	0	0	0	0	24.7	23.4375	0	2010
4.5-4.9	2	1	0	0	0	0	0	0	0	>=7	>=7	0	0	0	0	34.9	25.5937	0	2011
5.0-5.4	3	0	0	0	0	0	1	0	0	>=7	>=7	0	0	0	0	32.4	23.7542	1	2009
5.5-5.9	4	1	0	0	0	0	0	0	0	>=7	>=7	0	0	0	1	31.4	31.5083	0	2012
6.0-6.4	5	0	0	0	0	0	1	0	0	>=7	>=7	0	0	0	0	30.5	30.6159	0	2011
5.0-5.4	3	0	0	0	0	0	0	0	0	>=7	>=7	0	0	0	1	27.4	23.1096	0	2012
4.5-4.9	2	1	0	0	0	0	0	0	0	>=7	>=7	0	0	0	0	25.7	30.2448	0	2012
5.0-5.4	3	1	0	0	0	0	0	0	0	>=7	>=7	0	0	0	0	37.2	27.2392	1	2011
4.5-4.9	2	0	0	0	0	0	0	0	0	>=7	>=7	0	0	0	0	30.9	26.067	1	2011
5.0-5.4	3	1	0	0	0	1	0	0	0	>=7	>=7	0	0	0	0	37.7	25.5469	0	2010
5.5-5.9	4	0	0	0	0	0	0	0	0	>=7	>=7	0	0	0	0	25.7	26.0262	1	2010
4.5-4.9	2	1	1	1	0	0	0	0	0	>=7	>=7	0	0	0	0	29.2	25.2939	1	2013
5.5-5.9	4	0	0	0	0	0	1	0	0	>=7	>=7	0	0	0	0	30.8	31.0447	1	2010
6.0-6.4	5	0	0	0	0	0	0	0	0	>=7	>=7	0	0	0	0	27.6	25.2344	1	2009
5.5-5.9	4	0	0	0	0	0	0	0	0	>=7	>=7	0	0	0	0	37.2	25.5937	1	2009
4.5-4.9	2	0	0	0	0	0	0	0	0	>=7	>=7	0	0	0	0	27.6	24.3551	1	2009
4.5-4.9	2	0	0	0	0	0	0	0	0	>=7	>=7	0	0	0	0	29.2	22.6726	1	2011
5.0-5.4	3	1	0	0	0	0	0	0	0	>=7	>=7	0	0	0	0	29.6	26.7698	1	2010
4.5-4.9	2	1	0	0	0	0	0	0	0	>=7	>=7	0	0	0	0	33.7	32.0499	0	2012
5.0-5.4	3	0	0	0	0	0	0	0	0	>=7	>=7	0	0	0	0	28.2	26.3702	1	2011
6.0-6.4	5	0	0	0	0	0	0	0	0	>=7	>=7	0	0	0	0	26	34.3546	1	2009
5.5-5.9	4	0	0	0	0	0	0	0	0	>=7	>=7	0	0	0	0	26.4	29.7211	1	2009
5.0-5.4	3	1	0	0	0	0	0	0	0	>=7	>=7	0	0	0	0	30.1	27.5062	1	2009
5.0-5.4	3	0	0	0	0	0	0	0	0	>=7	>=7	0	0	0	0	28.5	26.9531	1	2009
5.5-5.9	4	0	0	0	0	0	0	0	0	>=7	>=7	0	0	0	0	34.2	28.2334	1	2009
5.5-5.9	4	0	0	0	0	0	0	0	0	>=7	>=7	0	0	0	0	27.9	34.2493	1	2009
5.0-5.4	3	1	0	0	0	0	0	0	0	>=7	>=7	0	0	0	0	27.5	26.6728	0	2012
6.5-6.9	6	0	0	0	0	0	0	0	0	>=7	>=7	0	0	0	0	38.3	28.2828	0	2010
5.0-5.4	3	0	0	0	0	0	1	0	0	>=7	>=7	0	0	0	0	28.5	22.7365	0	2010
5.0-5.4	3	0	0	1	0	0	0	0	0	>=7	>=7	0	0	0	0	31.6	26.0262	1	2012
5.0-5.4	3	0	0	0	0	0	0	0	0	>=7	>=7	0	0	0	0	25.1	27.0552	0	2011
4.5-4.9	2	0	0	0	0	0	0	0	0	>=7	>=7	0	0	0	0	27.2	26.6389	0	2013
5.5-5.9	4	0	0	0	0	0	0	0	0	>=7	>=7	0	0	0	0	28.5	32.4438	1	2009
5.0-5.4	3	0	0	0	0	0	0	0	0	>=7	>=7	0	0	0	0	27.9	27.1209	1	2009
5.0-5.4	3	0	0	1	0	0	0	0	0	>=7	>=7	0	0	0	0	30.2	27.3138	0	2011
5.5-5.9	4	1	0	0	0	0	0	0	0	>=7	>=7	0	0	0	0	39.3	24.7781	1	2009
5.5-5.9	4	1	1	1	0	0	0	0	1	>=7	>=7	0	0	0	0	32.1	32.2953	1	2009
5.0-5.4	3	0	0	0	0	0	0	0	0	>=7	>=7	0	0	0	0	25.5	29.865	1	2009
5.0-5.4	3	1	0	0	0	1	0	0	1	>=7	>=7	1	0	0	1	34.6	22.3771	1	2013
5.0-5.4	3	0	0	0	0	0	0	0	0	>=7	>=7	0	0	0	0	32.3	29.5312	1	2013
4.5-4.9	2	0	0	0	0	0	0	0	0	>=7	>=7	0	0	0	0	30	23.1096	0	2011
5.0-5.4	3	1	0	0	0	0	0	0	0	>=7	>=7	0	0	0	0	33	29.0105	1	2010
5.0-5.4	3	0	0	0	0	0	0	0	0	>=7	>=7	0	0	0	0	31.7	22.4996	1	2010
6.0-6.4	5	1	1	1	0	0	0	0	0	>=7	>=7	0	0	0	0	29.5	21.3504	1	2009
4.5-4.9	2	0	0	0	0	0	0	0	0	>=7	>=7	0	0	0	0	20.4	31.2394	1	2009
5.5-5.9	4	0	0	0	0	0	0	0	0	>=7	>=7	0	0	0	0	30.2	29.4162	1	2009
5.0-5.4	3	0	0	0	0	0	0	0	0	>=7	>=7	0	1	0	0	29.3	32.1427	0	2013
5.0-5.4	3	1	0	0	0	0	0	0	0	>=7	>=7	0	0	0	0	42.2	26.9983	1	2009
4.5-4.9	2	1	0	0	0	0	0	0	0	>=7	>=7	0	0	0	0	31.9	22.53	0	2013
5.0-5.4	3	0	0	0	0	0	0	0	0	>=7	>=7	0	0	0	0	30.6	23.2335	1	2009
5.0-5.4	3	0	0	0	0	0	0	0	0	>=7	>=7	0	0	0	0	26	25.5298	1	2009
5.0-5.4	3	1	0	0	0	0	0	0	0	>=7	>=7	0	0	0	0	33.5	27.8801	1	2009
5.0-5.4	3	0	0	1	0	0	0	0	0	>=7	>=7	0	0	0	0	31.1	24.8692	0	2013
5.5-5.9	4	1	1	1	0	0	0	0	0	>=7	>=7	0	0	0	0	34.2	33.2986	1	2010
5.0-5.4	3	0	0	0	0	0	0	0	0	>=7	>=7	0	0	0	0	37.7	25.3565	0	2009
5.0-5.4	3	1	0	0	0	0	0	0	0	>=7	>=7	0	0	0	0	26.4	27.6361	1	2009
5.5-5.9	4	1	0	0	0	0	0	0	0	>=7	>=7	0	0	0	0	32.2	34.3228	0	2009
6.0-6.4	5	0	0	0	0	1	0	0	0	>=7	>=7	0	0	0	1	25.2	27.9556	1	2009
5.5-5.9	4	0	0	0	0	0	0	0	0	>=7	>=7	1	0	0	0	34.7	30.8444	1	2009
4.5-4.9	2	0	0	0	0	0	0	0	0	>=7	>=7	0	0	0	0	22.9	23.3984	1	2012
5.5-5.9	4	1	0	0	0	0	0	0	0	>=7	>=7	1	0	0	1	29.3	28.2807	1	2013
5.0-5.4	3	0	0	1	0	0	0	0	0	>=7	>=7	0	0	0	0	36.1	35.5712	0	2013
5.0-5.4	3	1	0	0	0	0	0	0	0	>=7	>=7	0	0	0	0	36.1	24.3418	0	2012
5.0-5.4	3	0	0	1	0	0	0	0	0	>=7	>=7	0	0	0	0	27.3	29.0667	0	2011
4.5-4.9	2	0	0	0	0	0	0	0	0	>=7	>=7	0	0	0	0	26	25.3444	1	2009
5.0-5.4	3	0	0	0	0	0	0	0	0	>=7	>=7	0	0	0	0	27.3	24.3141	0	2011
5.5-5.9	4	0	0	0	0	0	0	0	0	>=7	>=7	0	0	0	1	23.8	27.2932	1	2009
5.5-5.9	4	0	0	0	0	0	0	0	0	>=7	>=7	0	0	0	0	29.5	23.1473	1	2009
6.0-6.4	5	0	0	0	0	0	0	0	0	>=7	>=7	0	0	0	0	21.4	29.5312	1	2009
5.5-5.9	4	0	0	0	0	0	1	0	1	>=7	>=7	0	0	0	0	31.4	27.4077	1	2009
4.5-4.9	2	0	0	0	0	0	0	0	0	>=7	>=7	0	0	0	0	36	26.7187	1	2011
5.0-5.4	3	0	0	0	0	0	0	0	0	>=7	>=7	0	0	0	0	25.1	30.4867	1	2009
6.0-6.4	5	1	0	0	0	0	0	0	0	>=7	>=7	0	0	0	0	24.1	31.5886	1	2010
5.0-5.4	3	1	0	0	0	0	0	0	0	>=7	>=7	0	0	0	0	36.2	23.0146	1	2013
5.0-5.4	3	0	0	0	0	0	0	0	0	>=7	>=7	0	0	0	0	25.5	25.5945	1	2009
5.0-5.4	3	0	0	0	0	0	0	0	0	>=7	>=7	0	0	0	0	24.5	25.1532	1	2009
5.0-5.4	3	1	0	0	0	0	0	0	0	>=7	>=7	1	0	0	0	29.3	24.8445	1	2012
5.5-5.9	4	0	0	0	0	0	0	0	0	>=7	>=7	0	0	0	0	25.8	26.8386	1	2011
5.5-5.9	4	1	0	0	0	0	0	0	0	>=7	>=7	0	0	0	0	30.7	37.2536	1	2009
5.5-5.9	4	1	0	0	0	0	0	0	0	>=7	>=7	0	0	0	0	32.9	39.0807	0	2011
5.5-5.9	4	1	0	0	0	0	0	0	0	>=7	>=7	0	0	0	0	24	28.9062	0	2009
5.0-5.4	3	0	0	0	0	0	0	0	0	>=7	>=7	0	0	0	0	37.8	23.2434	1	2010
5.0-5.4	3	1	0	0	0	0	0	0	0	>=7	>=7	0	0	0	0	29.6	22.918	0	2012
5.5-5.9	4	0	0	0	0	0	0	0	0	>=7	>=7	0	0	0	0	29.4	24.5726	1	2010
6.5-6.9	6	1	0	0	0	0	0	0	0	>=7	>=7	0	0	0	0	42.8	34.188	1	2011
5.5-5.9	4	1	0	0	0	0	0	0	0	>=7	>=7	0	0	0	0	30.9	25.4432	1	2009
6.0-6.4	5	1	0	0	0	0	0	0	0	>=7	>=7	0	0	0	0	39.3	32.6991	0	2010
6.0-6.4	5	1	0	0	0	0	0	0	0	>=7	>=7	0	0	0	0	41.5	32.05	0	2013
1.<4.5	1	1	1	1	0	0	0	0	0	>=7	>=7	0	0	0	0	27.5	24.5333	1	2010
5.5-5.9	4	1	0	0	0	0	0	0	0	>=7	>=7	0	0	0	0	32.6	28.125	1	2011
5.5-5.9	4	0	0	0	0	1	0	0	0	>=7	>=7	1	0	0	1	33.7	23.2333	1	2010
4.5-4.9	2	0	0	0	0	0	0	0	0	>=7	>=7	0	0	0	0	28.6	31.25	1	2010
5.5-5.9	4	1	0	0	0	0	0	0	0	>=7	>=7	0	0	0	0	28.2	29.3894	0	2011
5.0-5.4	3	1	0	0	0	0	0	0	0	>=7	>=7	0	0	0	0	30.7	29.5159	0	2013
4.5-4.9	2	1	1	1	0	0	0	0	0	>=7	>=7	0	0	0	0	28.9	30.2203	1	2010
5.0-5.4	3	0	0	0	0	1	0	0	0	>=7	>=7	1	0	0	1	22.1	24.8358	1	2013
5.5-5.9	4	0	0	0	0	0	0	0	0	>=7	>=7	0	0	0	0	31.7	27.4077	1	2010
5.0-5.4	3	0	0	0	0	0	0	0	0	>=7	>=7	0	0	0	0	22.6	25.2248	0	2009
5.5-5.9	4	0	0	0	0	0	0	0	0	>=7	>=7	0	0	0	0	38.1	27.4714	1	2010
6.0-6.4	5	1	0	0	0	0	0	0	0	>=7	>=7	0	0	0	0	36.3	28.4375	0	2012
6.0-6.4	5	1	0	0	0	1	0	0	0	>=7	>=7	1	0	0	1	38.4	28.2582	0	2010
>=7	7	1	0	0	0	0	0	0	1	<7	<7	0	0	0	1	25.2	43.4385	1	2010
5.5-5.9	4	1	0	0	0	1	0	0	0	>=7	>=7	1	0	0	0	29	27.5111	0	2010
5.0-5.4	3	0	0	0	0	0	1	0	0	>=7	>=7	0	0	0	0	33.6	26.3158	0	2011
6.0-6.4	5	0	0	0	0	0	0	0	0	>=7	>=7	0	0	0	0	42.2	27.449	0	2012
5.0-5.4	3	0	0	0	0	0	0	0	0	>=7	>=7	0	0	0	0	21.5	23.2335	1	2010
5.0-5.4	3	0	0	0	0	0	0	0	0	>=7	>=7	0	0	0	0	35	23.5156	0	2012
5.5-5.9	4	0	0	0	0	0	0	0	0	>=7	>=7	0	0	0	0	32.7	24.762	1	2010
5.5-5.9	4	1	0	0	0	0	0	0	0	>=7	>=7	0	0	0	0	31.5	32.0461	0	2012
5.5-5.9	4	0	0	0	0	0	0	0	0	>=7	>=7	0	0	0	0	31.7	24.977	1	2010
5.5-5.9	4	1	1	1	0	0	0	0	0	>=7	>=7	0	0	0	0	25.1	34.9636	1	2010
5.5-5.9	4	1	0	0	0	0	0	0	0	>=7	>=7	0	0	0	0	26.6	34.4641	0	2011
5.0-5.4	3	0	0	0	0	0	0	0	0	>=7	>=7	0	0	0	0	23.4	22.8374	1	2010
5.0-5.4	3	0	0	0	1	0	0	0	0	>=7	>=7	0	0	0	0	25.7	23.5588	1	2011
5.5-5.9	4	1	1	0	0	0	0	0	0	>=7	>=7	0	0	0	0	34.6	30.2545	1	2009
5.0-5.4	3	0	0	0	0	0	0	0	0	>=7	>=7	0	0	0	0	34.7	25.2268	1	2010
4.5-4.9	2	0	0	1	0	0	0	0	0	>=7	>=7	0	0	0	0	34.5	25.0668	0	2011
5.0-5.4	3	0	0	0	0	0	0	0	0	>=7	>=7	0	0	0	0	29	25.5298	1	2012
4.5-4.9	2	0	0	0	0	0	0	0	0	>=7	>=7	0	0	0	0	25.7	23.5883	1	2012
5.0-5.4	3	1	1	1	0	0	0	0	0	>=7	>=7	0	0	0	0	23.6	25.1532	1	2013
5.0-5.4	3	0	0	0	0	0	0	0	0	>=7	>=7	0	0	0	0	23.4	31.7993	1	2010
4.5-4.9	2	1	1	1	0	0	0	0	0	>=7	>=7	0	0	0	0	25.9	25.5568	1	2010
4.5-4.9	2	0	0	0	0	0	0	0	0	>=7	>=7	0	0	0	0	29.7	24.0055	1	2012
5.0-5.4	3	0	0	0	0	0	0	0	0	>=7	>=7	0	0	0	0	26.8	25.5457	1	2012
5.5-5.9	4	1	0	0	0	0	0	0	0	>=7	>=7	0	0	0	0	33.2	27.1094	1	2010
5.0-5.4	3	1	0	0	0	0	0	0	0	>=7	>=7	0	0	0	1	27.2	26.8444	1	2010
5.5-5.9	4	0	0	0	0	0	0	0	0	>=7	>=7	0	0	0	1	22.9	24.0346	1	2010
5.0-5.4	3	0	0	0	0	0	0	0	0	>=7	>=7	0	0	0	0	28.1	24.1787	1	2011
5.0-5.4	3	0	0	0	0	0	0	0	0	>=7	>=7	0	0	0	0	25.8	24.0346	1	2010
4.5-4.9	2	0	0	0	0	0	1	0	0	>=7	>=7	1	0	0	0	25.9	25.6369	1	2011
5.0-5.4	3	0	0	0	0	0	0	0	0	>=7	>=7	0	0	0	0	31.5	26.406	1	2010
5.0-5.4	3	0	0	0	0	0	0	0	0	>=7	>=7	0	0	0	0	33.7	27.5873	0	2012
5.0-5.4	3	0	0	0	0	0	0	0	0	>=7	>=7	0	0	0	0	31.3	26.3114	0	2011
6.5-6.9	6	0	0	0	0	0	0	0	0	>=7	>=7	0	0	0	0	33.3	37.2529	1	2010
5.5-5.9	4	0	0	0	0	0	0	0	0	>=7	>=7	0	0	0	0	27.5	26.956	0	2012
5.0-5.4	3	1	0	0	0	0	0	0	0	>=7	>=7	0	0	0	0	23.8	27.538	0	2011
5.0-5.4	3	0	0	0	0	0	0	0	0	>=7	>=7	0	0	0	0	26.7	24.9199	1	2011
5.0-5.4	3	0	0	0	0	0	0	0	0	>=7	>=7	0	0	0	0	31.5	24.9199	0	2012
5.0-5.4	3	0	0	0	0	0	0	0	1	>=7	>=7	1	0	0	0	29.1	31.8835	1	2011
5.0-5.4	3	1	1	1	0	0	0	0	1	>=7	>=7	0	0	0	0	27.3	27.4762	1	2010
4.5-4.9	2	1	0	0	0	0	0	0	0	>=7	>=7	0	0	0	0	24.6	24.093	0	2011
5.5-5.9	4	0	0	0	0	0	0	0	0	>=7	>=7	0	0	0	0	31.6	29.8845	1	2010
5.5-5.9	4	1	0	0	0	0	0	0	0	>=7	>=7	0	0	0	0	37.3	30.9018	0	2011
5.5-5.9	4	0	0	0	0	0	0	0	0	>=7	>=7	0	0	0	0	31.4	29.4023	0	2013
5.0-5.4	3	0	0	0	0	0	1	0	0	>=7	>=7	0	0	0	0	22.3	24.2701	0	2010
5.0-5.4	3	0	0	0	0	0	0	0	0	>=7	>=7	0	0	0	0	33.7	24.977	1	2012
5.0-5.4	3	0	0	0	0	0	0	0	0	>=7	>=7	0	0	0	0	35.2	32.2934	0	2013
5.5-5.9	4	0	0	0	0	0	1	0	0	>=7	>=7	0	0	0	0	34.2	26.6193	0	2013
6.0-6.4	5	0	0	0	0	0	0	0	0	>=7	>=7	0	0	0	0	30.5	32.8473	1	2010
5.5-5.9	4	1	0	0	0	0	0	0	0	>=7	>=7	0	0	0	0	28.2	25.8065	1	2010
5.5-5.9	4	0	0	0	0	0	0	0	0	>=7	>=7	0	0	0	0	28.4	18.7328	1	2013
5.0-5.4	3	1	0	0	0	0	0	0	0	>=7	>=7	0	0	0	0	29.7	24.4444	1	2011
5.5-5.9	4	0	0	0	0	0	0	0	0	>=7	>=7	0	0	0	0	30.4	29.5159	1	2011
5.5-5.9	4	0	0	0	0	0	1	0	0	>=7	>=7	0	0	0	0	29.3	25.7883	0	2012
5.5-5.9	4	0	0	0	0	0	1	0	0	>=7	>=7	0	0	0	0	30.9	28.3472	0	2013
5.5-5.9	4	0	0	0	0	0	0	0	0	>=7	>=7	0	0	0	0	24.7	28.7233	0	2012
5.0-5.4	3	0	0	1	0	0	0	1	0	>=7	>=7	0	0	0	0	34.8	27.6888	0	2012
5.0-5.4	3	0	0	1	0	1	0	1	0	>=7	>=7	0	0	0	1	36.4	26.1977	0	2013
5.0-5.4	3	0	0	1	0	0	0	0	0	>=7	>=7	0	0	0	0	21.2	20.1891	1	2010
5.5-5.9	4	1	0	0	0	1	0	0	0	>=7	>=7	0	0	0	0	34.8	29.903	1	2010
5.0-5.4	3	0	0	0	0	0	0	0	0	>=7	>=7	0	0	0	0	26.6	25.2826	1	2010
5.5-5.9	4	0	0	0	0	0	0	0	0	>=7	>=7	0	0	0	0	38.2	32.0499	1	2012
5.0-5.4	3	1	0	0	0	0	0	0	0	>=7	>=7	0	0	0	0	35.9	30.5996	1	2010
5.5-5.9	4	1	1	0	0	0	0	0	0	>=7	>=7	0	1	0	0	23.3	31.6456	1	2011
5.5-5.9	4	1	1	0	0	0	0	0	0	>=7	>=7	0	1	0	0	30.1	27.9155	1	2010
5.5-5.9	4	1	1	0	0	0	0	0	0	>=7	>=7	0	1	0	0	27.6	37.9239	1	2010
6.0-6.4	5	1	0	0	0	1	0	0	0	>=7	>=7	0	0	0	0	30.5	39.1136	0	2013
4.5-4.9	2	0	0	0	0	0	0	0	0	>=7	>=7	0	0	0	0	28.5	26.079	0	2012
5.5-5.9	4	0	0	0	0	0	0	0	0	>=7	>=7	0	0	0	0	35.3	34.049	0	2013
5.5-5.9	4	1	0	0	0	0	0	0	0	>=7	>=7	0	0	0	0	37	29.8855	0	2012
5.5-5.9	4	0	0	0	0	0	0	0	0	>=7	>=7	0	0	0	0	30	24.3418	0	2012
5.0-5.4	3	0	0	0	0	0	0	0	0	>=7	>=7	0	0	0	1	30.1	26.8386	0	2010
5.0-5.4	3	0	0	1	0	0	0	0	0	>=7	>=7	0	0	0	1	30.2	24.0796	0	2012
5.0-5.4	3	1	0	0	0	0	0	0	0	>=7	>=7	0	0	0	0	29.6	27.4681	0	2010
5.0-5.4	3	0	0	0	0	0	0	0	0	>=7	>=7	0	0	0	0	33.5	21.875	1	2010
5.0-5.4	3	0	0	1	0	0	0	0	0	>=7	>=7	0	0	0	0	30.4	26.1207	0	2012
5.0-5.4	3	0	0	0	0	0	0	0	0	>=7	>=7	0	0	0	0	23.3	23.4375	1	2010
4.5-4.9	2	0	0	0	0	1	0	0	0	>=7	>=7	1	0	0	1	25.3	22.151	0	2012
5.0-5.4	3	0	0	0	0	0	0	0	0	>=7	>=7	0	0	0	0	35.2	28.0624	1	2012
4.5-4.9	2	0	0	0	0	0	0	0	0	>=7	>=7	0	0	0	0	29.9	22.6337	1	2011
4.5-4.9	2	1	0	0	0	0	0	0	0	>=7	>=7	0	0	0	0	28	29.0564	0	2013
5.0-5.4	3	1	0	0	0	0	0	0	0	>=7	>=7	0	0	0	0	28.2	26.2227	0	2013
5.0-5.4	3	1	0	0	0	0	0	0	0	>=7	>=7	0	0	0	0	29.1	23.8144	1	2010
5.0-5.4	3	0	0	0	0	0	1	0	0	>=7	>=7	0	0	0	0	25.7	26.0937	1	2011
5.0-5.4	3	1	1	1	0	0	0	0	0	>=7	>=7	0	0	0	0	28.3	25.1559	1	2010
5.0-5.4	3	1	0	0	0	0	0	0	0	>=7	>=7	0	0	0	0	28.8	23.721	0	2013
5.5-5.9	4	1	0	0	0	0	0	0	0	>=7	>=7	0	0	0	0	27.7	27.239	0	2013
5.0-5.4	3	0	0	0	0	0	0	0	0	>=7	>=7	0	0	0	0	33.8	25.9612	1	2012
4.5-4.9	2	0	0	0	0	0	0	0	0	>=7	>=7	0	0	0	0	25.2	24.5632	1	2010
5.0-5.4	3	1	1	1	0	0	0	0	0	>=7	>=7	0	0	0	0	23.6	29.4758	1	2012
5.5-5.9	4	0	0	0	0	0	0	0	0	>=7	>=7	0	0	0	0	40.9	25.9645	0	2012
6.0-6.4	5	1	0	0	0	0	0	0	0	>=7	>=7	0	0	0	0	33.2	29.3623	0	2010
6.0-6.4	5	1	0	0	0	0	0	0	0	>=7	>=7	0	0	0	0	31.1	32.4192	1	2010
5.5-5.9	4	0	0	0	0	0	0	0	0	>=7	>=7	0	0	0	0	30.4	23.6244	1	2010
6.0-6.4	5	0	0	0	0	0	0	0	0	>=7	>=7	0	0	0	0	31.5	24.999	0	2012
5.5-5.9	4	0	0	0	0	0	0	0	0	>=7	>=7	0	0	0	0	29.6	33.2391	1	2011
5.5-5.9	4	0	0	0	0	0	0	0	0	>=7	>=7	0	0	0	0	31.8	33.4622	0	2013
5.0-5.4	3	0	0	0	0	0	0	0	0	>=7	>=7	0	0	0	0	26.1	23.8804	0	2010
5.0-5.4	3	1	0	0	0	0	0	0	0	>=7	>=7	0	0	0	0	32.3	27.1203	1	2011
1.<4.5	1	0	0	0	0	0	0	0	0	>=7	>=7	0	0	0	0	28.7	24.6904	1	2011
5.0-5.4	3	0	0	0	0	0	0	0	0	>=7	>=7	0	0	0	0	26.4	25.625	1	2011
5.5-5.9	4	1	1	1	0	0	0	0	0	>=7	>=7	0	0	0	0	28.7	26.4441	1	2011
5.5-5.9	4	0	0	0	0	0	0	0	1	>=7	>=7	0	0	0	0	25.9	30.1103	0	2013
4.5-4.9	2	1	0	0	0	0	0	0	0	>=7	>=7	0	0	0	0	31.9	24.3418	0	2013
5.0-5.4	3	1	0	0	0	0	0	0	0	>=7	>=7	0	0	0	1	26.4	22.8624	1	2011
4.5-4.9	2	0	0	1	0	0	0	0	0	>=7	>=7	0	0	0	0	29.5	23.4339	1	2013
5.5-5.9	4	0	0	0	0	0	0	0	0	>=7	>=7	1	0	0	1	31.9	24.4473	1	2010
5.5-5.9	4	0	0	0	0	0	0	0	0	>=7	>=7	0	0	0	0	34.5	25.0142	0	2013
5.5-5.9	4	0	0	0	0	0	0	0	0	>=7	>=7	0	0	0	0	29.1	25.4767	1	2011
5.0-5.4	3	0	0	0	0	0	0	0	1	>=7	>=7	0	0	0	0	27.4	30.385	1	2013
5.0-5.4	3	0	0	0	0	0	0	0	0	>=7	>=7	0	0	0	0	28.6	24.9778	1	2011
5.5-5.9	4	1	0	0	0	0	0	0	0	>=7	>=7	0	0	0	0	33.1	30.9171	0	2011
5.5-5.9	4	0	0	0	0	0	0	0	0	>=7	>=7	0	0	0	1	39.5	24.4511	0	2011
5.0-5.4	3	0	0	0	0	0	0	0	0	>=7	>=7	0	0	0	0	24.5	23.1111	1	2011
5.5-5.9	4	0	0	0	0	0	0	0	0	>=7	>=7	0	0	0	0	30.6	27.4219	0	2012
5.0-5.4	3	0	0	0	0	0	0	0	0	>=7	>=7	0	0	0	0	31.7	24.1795	1	2011
5.5-5.9	4	1	1	1	0	1	0	0	1	>=7	>=7	0	0	0	0	29	33.5111	1	2011
5.0-5.4	3	0	0	0	0	0	0	0	0	>=7	>=7	0	0	0	0	30.7	26.2985	1	2011
5.0-5.4	3	0	0	1	0	0	0	0	0	>=7	>=7	0	0	0	0	27.1	26.3807	0	2013
5.0-5.4	3	0	0	0	0	0	0	0	0	>=7	>=7	0	0	0	0	30.7	24.2215	1	2011
6.0-6.4	5	0	0	0	0	0	0	0	0	>=7	>=7	0	0	0	0	28	27.6444	1	2010
5.0-5.4	3	0	0	0	0	0	0	0	0	>=7	>=7	0	0	0	0	28.1	28.8	1	2011
5.0-5.4	3	0	0	0	0	0	0	0	0	>=7	>=7	0	0	0	0	22.9	22.6726	0	2011
5.0-5.4	3	0	0	1	0	0	0	0	0	>=7	>=7	0	0	0	0	25.4	23.0344	1	2010
5.5-5.9	4	0	0	0	0	0	0	0	0	>=7	>=7	0	0	0	0	32	24.5954	1	2011
6.0-6.4	5	0	0	0	0	1	0	0	0	>=7	>=7	1	0	0	0	30.6	30.8185	0	2010
5.5-5.9	4	1	0	0	0	0	0	0	1	>=7	>=7	0	0	0	1	35.7	31.4672	1	2011
5.5-5.9	4	0	0	0	0	0	0	0	0	>=7	>=7	1	0	0	0	30.9	25.3203	0	2010
5.5-5.9	4	0	0	0	0	0	0	0	0	>=7	>=7	0	0	0	0	31.3	23.6547	1	2011
5.5-5.9	4	0	0	1	0	0	0	0	0	>=7	>=7	0	0	0	0	28.1	25.8478	0	2013
5.0-5.4	3	0	0	1	0	0	0	0	1	>=7	>=7	0	0	0	0	36.1	27.2392	0	2010
5.0-5.4	3	0	0	0	0	0	1	0	0	>=7	>=7	0	0	0	0	34.2	24.6914	1	2011
5.0-5.4	3	0	0	0	0	0	0	0	0	>=7	>=7	0	0	0	0	27.7	30.3302	1	2010
5.0-5.4	3	1	0	0	0	0	0	0	0	>=7	>=7	0	0	0	0	37.3	35.1301	1	2011
5.5-5.9	4	1	0	0	0	0	0	0	0	>=7	>=7	0	0	0	0	39.8	36.2123	0	2013
5.0-5.4	3	0	0	0	0	0	0	0	0	>=7	>=7	0	0	0	0	35.5	23.1473	0	2011
>=7	7	0	0	1	0	0	0	0	0	>=7	>=7	0	0	0	0	35.1	23.4375	1	2011
5.0-5.4	3	0	0	0	0	0	0	0	0	>=7	>=7	0	0	0	0	30	26.5932	1	2011
5.5-5.9	4	1	0	0	0	0	0	0	0	>=7	>=7	0	0	0	1	31.9	32.4151	0	2011
5.5-5.9	4	1	0	0	0	0	0	0	0	>=7	>=7	0	0	0	0	34.3	26.6137	0	2011
5.0-5.4	3	0	0	0	0	0	0	0	0	>=7	>=7	0	0	0	0	30.5	28.3594	0	2011
5.5-5.9	4	0	0	0	0	0	0	0	1	>=7	>=7	0	0	0	0	28.7	26.3298	0	2013
5.0-5.4	3	0	0	0	0	0	0	0	0	>=7	>=7	0	0	0	0	32.7	25.8383	1	2011
5.5-5.9	4	0	0	0	0	0	0	0	0	>=7	>=7	0	0	0	0	31	28.2426	1	2011
5.5-5.9	4	0	0	1	0	0	0	0	0	>=7	>=7	0	0	0	1	32.4	28.3217	0	2012
4.5-4.9	2	1	0	0	0	0	0	0	0	>=7	>=7	0	0	0	0	32.3	29.6427	0	2013
5.0-5.4	3	0	0	0	0	0	0	0	0	>=7	>=7	0	0	0	1	28.9	26.6564	1	2011
5.0-5.4	3	0	0	0	0	0	0	0	0	>=7	>=7	0	0	0	0	26.5	29.3848	1	2011
5.0-5.4	3	0	0	0	0	0	0	0	0	>=7	>=7	0	0	0	0	30.2	25.7166	0	2011
6.0-6.4	5	0	0	0	0	0	0	0	0	>=7	>=7	0	0	0	0	27.9	32.0312	1	2011
6.0-6.4	5	1	1	1	0	0	0	0	0	>=7	>=7	0	1	0	0	34.4	22.1875	1	2011
6.5-6.9	6	1	1	0	0	0	0	0	0	>=7	>=7	0	0	0	0	31.7	28.125	1	2013
5.0-5.4	3	0	0	0	0	0	0	0	0	>=7	>=7	0	0	0	0	26.3	24.8192	1	2011
5.0-5.4	3	0	0	1	0	0	0	0	0	>=7	>=7	0	0	0	0	41.2	26.1977	0	2011
5.5-5.9	4	1	1	0	0	0	0	0	0	>=7	>=7	0	1	0	0	28	31.966	0	2011
5.5-5.9	4	0	0	0	0	1	0	0	0	>=7	>=7	1	0	0	1	32.8	34.6746	1	2011
5.0-5.4	3	1	0	0	0	0	0	0	0	>=7	>=7	0	0	0	0	27.8	30.7574	1	2011
5.0-5.4	3	1	0	0	0	0	0	0	0	>=7	>=7	0	0	0	0	28.9	31.6118	0	2012
5.0-5.4	3	1	0	0	0	0	0	0	0	>=7	>=7	0	0	0	0	30.1	31.1182	0	2012
4.5-4.9	2	0	0	0	0	0	0	0	0	>=7	>=7	0	0	0	0	27.1	28.4352	1	2011
6.0-6.4	5	0	0	0	0	0	1	0	0	>=7	>=7	0	0	0	0	25.5	22.8928	1	2011
6.0-6.4	5	0	0	0	0	0	0	0	0	>=7	>=7	0	0	0	0	43.5	39.8975	1	2013
4.5-4.9	2	0	0	0	0	0	0	0	0	>=7	>=7	0	0	0	0	33.3	21.4844	1	2012
4.5-4.9	2	0	0	0	0	0	0	0	0	>=7	>=7	0	0	0	0	35.1	22.1094	0	2013
5.0-5.4	3	0	0	1	0	0	0	0	0	>=7	>=7	0	0	0	0	32.2	26.8386	1	2011
5.0-5.4	3	0	0	0	0	0	0	0	0	>=7	>=7	0	0	0	0	34.5	28.2284	1	2012
5.0-5.4	3	0	0	0	0	0	0	0	0	>=7	>=7	0	0	0	0	34.9	20.0079	0	2013
5.0-5.4	3	1	1	1	0	1	0	0	0	>=7	>=7	0	0	0	0	26.9	27.9807	1	2012
5.5-5.9	4	1	0	0	0	0	0	0	0	>=7	>=7	0	1	0	0	34.2	34.245	0	2011
5.0-5.4	3	0	0	0	0	0	0	0	0	>=7	>=7	1	0	0	0	23.7	21.4525	1	2012
5.0-5.4	3	0	0	0	0	0	0	0	1	>=7	>=7	0	0	0	0	30.8	26.3147	1	2011
5.5-5.9	4	1	1	1	0	0	0	0	0	>=7	>=7	0	0	0	0	35.7	39.9408	1	2011
5.5-5.9	4	0	0	0	0	0	0	0	0	>=7	>=7	0	0	0	1	29.9	27.1992	1	2011
5.5-5.9	4	1	1	1	0	0	0	0	0	>=7	>=7	0	0	0	0	29.3	34.1059	1	2011
5.5-5.9	4	0	0	0	0	0	0	0	0	>=7	>=7	0	0	0	0	26.8	28.1666	0	2013
5.0-5.4	3	0	0	0	0	0	0	0	0	>=7	>=7	0	0	0	0	24.1	24.6548	1	2013
5.0-5.4	3	1	0	0	0	0	0	0	0	>=7	>=7	0	0	0	0	28.7	28.6851	1	2012
5.5-5.9	4	0	0	0	0	0	1	0	0	>=7	>=7	0	0	0	0	30	32.4354	1	2012
5.0-5.4	3	0	0	0	0	0	1	0	0	>=7	>=7	0	0	0	0	28.6	23.7228	0	2011
5.0-5.4	3	0	0	0	0	0	0	0	0	>=7	>=7	0	0	0	0	33	29.2822	0	2013
5.5-5.9	4	0	0	0	0	0	0	0	0	>=7	>=7	0	0	0	1	34.8	24.5578	1	2012
5.0-5.4	3	0	0	1	0	0	0	0	0	>=7	>=7	0	0	0	0	28.1	26.4381	0	2012
5.0-5.4	3	0	0	0	0	0	0	0	0	>=7	>=7	0	0	0	1	32.8	28.0404	1	2012
5.5-5.9	4	0	0	0	0	0	0	0	0	>=7	>=7	0	0	0	0	24.8	24.8437	0	2011
1.<4.5	1	0	0	0	0	0	0	0	0	>=7	>=7	0	0	0	0	39.1	20.5049	1	2011
5.0-5.4	3	0	0	0	0	0	0	0	0	>=7	>=7	0	0	0	0	30	23.996	1	2011
4.5-4.9	2	0	0	0	0	0	0	0	0	>=7	>=7	0	0	0	0	38.8	26.5039	1	2012
4.5-4.9	2	0	0	0	0	0	0	0	0	>=7	>=7	0	0	0	0	29.2	22.8883	1	2011
5.0-5.4	3	0	0	0	0	1	0	0	0	>=7	>=7	0	0	0	0	29	25.6369	1	2013
5.0-5.4	3	0	0	0	0	0	0	0	0	>=7	>=7	0	0	0	0	30.9	23.472	0	2013
5.0-5.4	3	1	0	0	0	1	0	0	1	>=7	>=7	1	0	0	1	30.6	27.5492	1	2012
5.0-5.4	3	0	0	0	0	0	0	0	0	>=7	>=7	0	0	0	0	30.1	32.9687	1	2012
4.5-4.9	2	0	0	0	0	0	0	0	0	>=7	>=7	0	0	0	0	26.7	27.5506	1	2012
5.0-5.4	3	0	0	0	0	0	0	0	0	>=7	>=7	1	0	0	1	38.9	26.5731	1	2013
5.5-5.9	4	1	1	1	0	0	0	0	0	>=7	>=7	0	0	0	0	42.9	32.3563	0	2013
5.0-5.4	3	0	0	0	0	0	0	0	0	>=7	>=7	0	0	0	0	38.7	25.8291	0	2012
1.<4.5	1	1	1	1	0	0	0	0	0	>=7	>=7	0	0	0	0	31	28.8778	1	2012
4.5-4.9	2	0	0	0	0	0	0	0	0	>=7	>=7	0	0	0	0	33.8	24.2187	0	2011
5.5-5.9	4	0	0	0	0	0	0	0	0	>=7	>=7	0	0	0	0	38.2	26.0055	0	2012
6.5-6.9	6	1	1	0	0	0	0	0	0	>=7	>=7	0	0	0	0	37.1	30.1838	1	2012
6.0-6.4	5	1	0	0	0	1	0	0	1	>=7	>=7	1	0	0	1	42.7	34.9277	0	2013
5.0-5.4	3	0	0	1	0	0	0	0	0	>=7	>=7	0	0	0	0	24.1	19.5776	1	2012
5.0-5.4	3	0	0	0	0	0	0	0	0	>=7	>=7	0	0	0	0	33.5	32.4661	0	2011
5.0-5.4	3	0	0	1	0	0	0	0	0	>=7	>=7	0	0	0	0	35.8	24.4444	0	2013
5.5-5.9	4	0	0	0	0	0	0	0	0	>=7	>=7	0	0	0	0	32.5	25.2237	0	2012
5.0-5.4	3	0	0	0	0	0	0	0	0	>=7	>=7	0	0	0	0	24.2	29.132	1	2012
5.0-5.4	3	1	0	0	0	1	0	0	0	>=7	>=7	1	0	0	0	29.8	28.617	1	2012
6.0-6.4	5	1	0	0	0	0	0	0	0	>=7	>=7	0	0	0	0	29.3	26.8273	1	2012
5.5-5.9	4	0	0	0	0	0	0	0	0	>=7	>=7	0	0	0	0	35	26.6728	1	2012
5.0-5.4	3	0	0	0	0	0	0	0	0	>=7	>=7	0	0	0	0	26.1	20.1956	1	2011
5.0-5.4	3	0	0	0	0	0	1	0	0	>=7	>=7	0	0	0	0	28.9	29.5987	1	2012
5.5-5.9	4	0	0	1	0	0	0	0	0	>=7	>=7	1	0	0	0	31.2	23.4375	1	2012
5.0-5.4	3	1	0	0	0	0	0	0	0	>=7	>=7	0	0	0	0	32.7	24.6667	1	2012
5.5-5.9	4	1	1	1	0	0	0	0	0	>=7	>=7	0	0	0	0	22.1	29.2101	1	2012
5.0-5.4	3	1	1	1	0	0	0	0	0	>=7	>=7	0	0	0	0	30.1	21.4201	1	2011
5.0-5.4	3	0	0	0	0	0	0	0	0	>=7	>=7	0	0	0	0	30.5	23.0841	1	2012
5.0-5.4	3	0	0	0	0	0	0	0	0	>=7	>=7	0	0	0	0	27.6	19.9219	1	2012
5.0-5.4	3	0	0	0	0	0	0	0	0	>=7	>=7	0	0	0	0	26	28.4799	1	2012
5.0-5.4	3	0	0	0	0	0	0	0	0	>=7	>=7	0	0	0	0	25.8	34.207	0	2013
5.0-5.4	3	1	0	0	0	0	0	0	0	>=7	>=7	0	0	0	1	31.6	23.7141	0	2012
6.0-6.4	5	1	0	0	0	0	0	0	0	>=7	>=7	0	0	0	1	41.3	26.7094	1	2013
5.0-5.4	3	0	0	0	0	0	0	0	0	>=7	>=7	0	0	0	0	33.1	27.6889	1	2013
5.5-5.9	4	1	0	0	0	0	0	0	0	>=7	>=7	0	0	0	0	26	39.8199	1	2012
6.0-6.4	5	0	0	0	0	0	0	0	0	>=7	>=7	0	0	0	0	33.7	28.3987	1	2012
5.0-5.4	3	0	0	0	0	0	0	0	0	>=7	>=7	0	0	0	0	28.8	22.7333	1	2012
4.5-4.9	2	0	0	0	0	0	0	0	0	>=7	>=7	0	0	0	0	27	20.9644	1	2012
6.0-6.4	5	0	0	0	0	0	0	0	0	>=7	>=7	0	0	0	0	31	23.7282	0	2012
5.5-5.9	4	0	0	0	0	0	0	0	0	>=7	>=7	0	1	0	1	35.1	27.1745	0	2013
5.5-5.9	4	0	0	1	0	0	0	0	0	>=7	>=7	0	0	0	0	26.3	20.7612	1	2012
5.5-5.9	4	0	0	0	0	0	0	0	0	>=7	>=7	0	0	0	0	31	24.5205	1	2012
5.5-5.9	4	0	0	1	0	0	0	0	0	>=7	>=7	0	0	0	0	29.7	32.8614	0	2012
5.5-5.9	4	1	0	0	0	0	0	0	0	>=7	>=7	0	0	0	0	26.3	28.6328	1	2012
5.0-5.4	3	0	0	0	0	0	0	0	0	>=7	>=7	0	0	0	0	27.4	32.0094	1	2012
4.5-4.9	2	0	0	0	0	0	0	0	0	>=7	>=7	0	0	0	0	24	26.5625	1	2012
5.5-5.9	4	0	0	0	0	0	0	0	0	>=7	>=7	0	0	0	0	31.6	29.0114	1	2012
5.0-5.4	3	0	0	0	0	0	0	0	0	>=7	>=7	0	0	0	0	22.9	23.5156	0	2013
5.5-5.9	4	0	0	1	0	0	1	0	0	>=7	>=7	0	0	0	0	22.7	25.7812	1	2012
5.0-5.4	3	0	0	1	0	1	0	0	0	>=7	>=7	0	0	0	0	26.7	21.3382	1	2012
6.5-6.9	6	0	0	0	0	0	0	0	0	>=7	>=7	0	0	0	0	43.7	25.7657	0	2012
5.0-5.4	3	0	0	0	0	0	0	0	0	>=7	>=7	0	0	0	0	16.7	25.6816	1	2012
5.0-5.4	3	0	0	0	0	0	0	0	0	>=7	>=7	0	0	0	0	28.9	27.9421	0	2012
5.5-5.9	4	1	1	1	0	0	0	0	0	>=7	>=7	0	0	0	0	30.5	21.0068	1	2012
5.0-5.4	3	0	0	0	0	0	0	0	0	>=7	>=7	0	0	0	0	32.4	29.2427	1	2013
5.0-5.4	3	0	0	0	0	0	0	0	0	>=7	>=7	0	0	0	0	26.6	22.1003	1	2012
5.0-5.4	3	0	0	1	0	0	0	0	0	<7	>=7	0	0	0	1	31.9	23.3731	1	2013
6.5-6.9	6	0	0	0	0	0	0	0	0	>=7	>=7	0	0	0	0	28.9	30.863	1	2012
5.0-5.4	3	1	0	0	0	0	0	0	0	<7	>=7	0	0	0	1	30	28.441	1	2013
5.0-5.4	3	0	0	0	0	0	0	0	0	>=7	>=7	0	0	0	0	28	27.2817	1	2013
5.5-5.9	4	0	0	0	0	0	0	0	0	>=7	>=7	0	0	0	0	35.4	25.9701	1	2013
5.5-5.9	4	1	0	0	0	0	0	0	0	>=7	>=7	0	0	0	0	28.4	35.5891	0	2012
5.5-5.9	4	1	0	0	0	0	0	0	0	>=7	>=7	0	0	0	0	32.2	30.6293	0	2013
5.0-5.4	3	1	1	1	0	0	0	0	0	>=7	>=7	0	0	0	0	38.3	25.2343	1	2012
5.0-5.4	3	0	0	0	0	0	0	0	0	>=7	>=7	0	0	0	0	27.9	32.218	1	2012
5.0-5.4	3	0	0	0	0	0	0	0	0	>=7	>=7	0	0	0	0	27.6	24.2222	1	2012
5.5-5.9	4	0	0	0	0	0	0	0	1	>=7	>=7	0	0	0	0	37	28.3594	1	2012
4.5-4.9	2	1	0	0	0	0	0	0	0	>=7	>=7	0	0	0	0	29.6	24.8033	1	2013
5.0-5.4	3	0	0	0	0	0	0	0	0	>=7	>=7	0	0	0	0	29.5	24.2389	1	2012
5.5-5.9	4	1	1	1	0	0	0	0	0	>=7	>=7	0	0	0	0	28.4	30.8984	1	2013
5.0-5.4	3	0	0	1	1	0	0	0	0	>=7	>=7	0	1	0	0	39.8	29.5312	0	2013
5.0-5.4	3	0	0	0	0	0	0	0	0	>=7	>=7	0	0	0	0	35.1	28.0234	1	2013
5.0-5.4	3	0	0	0	0	0	0	0	0	>=7	>=7	0	0	0	0	28.2	34.1749	1	2012
4.5-4.9	2	0	0	0	0	1	0	0	0	>=7	>=7	0	0	0	0	36.4	26.7969	0	2012
5.5-5.9	4	0	0	0	0	1	0	0	0	>=7	>=7	1	0	0	0	25.9	25.4735	1	2013
5.5-5.9	4	0	0	0	0	0	0	0	0	>=7	>=7	0	0	0	0	30	23.4337	1	2012
5.0-5.4	3	0	0	0	0	0	0	0	0	>=7	>=7	0	0	0	0	25.7	25.0761	1	2012
5.5-5.9	4	0	0	0	0	0	0	0	0	>=7	>=7	0	0	0	0	24.8	29.9556	1	2012
5.0-5.4	3	1	0	0	0	0	0	0	0	>=7	>=7	0	0	0	0	31.9	34.626	1	2013
4.5-4.9	2	0	0	0	0	0	0	0	0	>=7	>=7	0	0	0	1	29.8	27.0163	1	2013
4.5-4.9	2	0	0	0	0	0	0	0	0	>=7	>=7	0	0	0	0	25.4	26.3111	1	2013
5.5-5.9	4	0	0	0	0	0	0	0	0	>=7	>=7	0	0	0	0	27.5	28.7614	0	2013
1.<4.5	1	0	0	0	0	0	0	0	0	>=7	>=7	0	0	0	0	23.6	29.3724	1	2013
5.5-5.9	4	0	0	0	0	0	0	0	0	>=7	>=7	0	0	0	0	29.5	27.6562	1	2013
5.0-5.4	3	0	0	1	0	0	0	0	0	>=7	>=7	0	0	0	0	32.8	33.5937	1	2013
4.5-4.9	2	0	0	0	0	0	0	0	0	>=7	>=7	0	0	0	0	28	22.1003	1	2013
6.0-6.4	5	0	0	0	0	1	0	0	0	>=7	>=7	0	0	0	0	41.1	30.6354	1	2012
5.0-5.4	3	0	0	0	0	0	0	0	0	>=7	>=7	0	0	0	0	25.8	21.6512	1	2013
5.0-5.4	3	0	0	0	0	0	0	0	0	>=7	>=7	0	0	0	0	22.1	27.2392	1	2013
5.5-5.9	4	0	0	0	0	0	0	0	0	>=7	>=7	0	0	0	0	30.4	26.4441	1	2013
5.0-5.4	3	1	0	0	0	0	0	0	0	>=7	>=7	0	0	0	0	40.4	22.0106	1	2013
5.0-5.4	3	1	0	0	0	0	0	0	0	>=7	>=7	0	0	0	0	26.7	31.8058	0	2013
5.0-5.4	3	0	0	0	0	0	0	0	0	>=7	>=7	0	0	0	0	32.6	27.7199	1	2013
5.0-5.4	3	0	0	0	0	0	0	0	0	>=7	>=7	0	0	0	0	27	23.4375	1	2013
5.0-5.4	3	1	1	1	0	0	0	0	0	>=7	>=7	0	0	0	0	28.3	37.0934	1	2013
5.0-5.4	3	0	0	0	0	0	0	0	0	>=7	>=7	0	0	0	0	43.3	29.6449	1	2013
5.0-5.4	3	0	0	0	0	0	0	0	0	>=7	>=7	0	0	0	0	21.3	31.4861	1	2013
4.5-4.9	2	0	0	0	0	0	0	0	0	>=7	>=7	0	0	0	1	36.7	20.4382	1	2013
5.5-5.9	4	1	0	0	0	0	0	0	0	>=7	>=7	0	0	0	0	22.8	30.8172	0	2013
5.0-5.4	3	0	0	0	0	0	0	0	0	>=7	>=7	0	0	0	0	29.9	24.5361	1	2013
5.0-5.4	3	1	1	1	0	0	0	0	0	>=7	>=7	0	0	0	0	19.9	32.1875	1	2013
5.5-5.9	4	0	0	0	0	0	0	0	0	>=7	>=7	0	0	0	0	32.5	30.4438	1	2013
6.0-6.4	5	0	0	0	0	0	0	0	0	>=7	>=7	0	0	0	0	37.4	28.7201	0	2013
5.0-5.4	3	0	0	0	0	0	0	0	0	>=7	>=7	0	0	0	0	32.4	21.7969	1	2013
5.5-5.9	4	0	0	0	0	1	0	0	1	>=7	>=7	1	0	0	1	31.5	29.9497	1	2013
5.0-5.4	3	0	0	0	0	0	0	0	0	>=7	>=7	0	0	0	0	24.7	23.7333	1	2013
5.0-5.4	3	0	0	0	0	1	0	0	1	>=7	>=7	1	0	0	1	32.1	24.4627	1	2013
5.0-5.4	3	0	0	0	0	0	0	0	0	>=7	>=7	0	0	0	0	35	25.3569	0	2013
5.0-5.4	3	0	0	0	0	0	0	0	0	>=7	>=7	0	0	0	0	23.5	26.5557	1	2013
5.5-5.9	4	1	1	1	0	0	0	0	0	>=7	>=7	0	0	0	0	33.9	30.7087	1	2013
6.0-6.4	5	0	0	0	0	0	0	0	0	>=7	>=7	1	0	0	1	38.6	27.2932	1	2013
5.0-5.4	3	0	0	0	0	0	0	0	0	>=7	>=7	0	0	0	0	29.4	30.2545	1	2013
4.5-4.9	2	0	0	0	0	0	0	0	0	>=7	>=7	0	0	0	1	34.2	29.129	0	2013
5.5-5.9	4	0	0	0	0	0	0	0	0	>=7	>=7	0	0	0	0	34.5	30.0864	0	2013
5.5-5.9	4	0	0	0	0	0	0	0	0	>=7	>=7	0	0	0	0	27.5	25.1562	1	2013
5.0-5.4	3	0	0	0	0	0	0	0	0	>=7	>=7	0	0	0	0	30.8	31.1478	1	2013
5.0-5.4	3	0	0	0	1	0	0	0	0	>=7	>=7	0	0	0	0	34	28.3786	0	2013
5.0-5.4	3	0	0	0	0	0	1	0	0	>=7	>=7	0	1	0	0	29	37.0447	1	2013
5.0-5.4	3	0	0	0	0	0	1	0	0	>=7	>=7	0	0	0	0	31.6	26.782	1	2013
4.5-4.9	2	0	0	0	0	0	0	0	0	>=7	>=7	0	0	0	0	25.9	24.7768	1	2013
